# Supplementary material for: Design and synthesis of novel monoterpenoid indole alkaloid-like analogues and their antitumour activities in vitro
Source: Royal Society of Chemistry journal article supplement (doi:10.1039/c8ob00677f), 2018-01-01

## Supporting Information

### Design and synthesis of novel monoterpenoidindole alkaloids-like analogues and their antitumour activities *in vitro*

Jiaqi Fang,<sup>†a,b</sup> Tao Huang,<sup>†a,b,c</sup> MengyuanXia,<sup>c</sup> Lulu Deng,<sup>a,b</sup> XiaojiangHao,<sup>a,b</sup> Yuehu Wang,<sup>c,\*</sup> and Shuzhen Mu<sup>a,\*</sup>

<sup>a</sup> State Key Laboratory of Functions and Applications of Medicinal Plants, Guizhou Medical University, 3491 Baijin Road, Guiyang 550014, PR China.

<sup>b</sup> The Key Laboratory of Chemistry for Natural Products of Guizhou Province and Chinese Academy of Sciences, 3491 Baijin Road, Guiyang 550014, China.

<sup>c</sup> Kunming Institute of Botany, Chinese Academy of Sciences, Kunming 650201, Yunnan, P. R. China.

<sup>†</sup> These authors contributed equally to this work.

\*Corresponding authors.

Tel.: +86-851-83802214; Fax.: +86-851-83805081. E-mail address: muzi0558@126.com (S.Z. Mu), wangyuehu@mail.kib.ac.cn (Y.H. Wang).

| Table of contents.....                                                                            | Page No. |
|---------------------------------------------------------------------------------------------------|----------|
| The preparation of genipin derivatives and L-tryptophane derivatives.....                         | 2        |
| synthetic routes of intermediates.....                                                            | 7        |
| References.....                                                                                   | 8        |
| <sup>1</sup> H- NMR and <sup>13</sup> C-NMR, and HR-EI-MS spectra for compounds <b>1–34</b> ..... | 9        |

### The preparation of genipin (**G**)

Genipin (**G**) was obtained by the enzymatic hydrolysis (emulsin) of geniposide that was isolated from *Gardenia jasminoides* Ellis. **G** was unsteady in aqueous solution and could be isomerized to form a couple of epimers<sup>[1]</sup> that can be observed by the NMR. These two epimers were unable to be separated by conventional methods.

<sup>1</sup>H-NMR (CDCl<sub>3</sub>, 400 MHz) for **G**  $\delta$  (ppm): 7.53 (d,  $J$  = 0.8 Hz, 1H), 5.88 (d,  $J$  = 0.8 Hz, 1H), 4.80 (d,  $J$  = 7.2 Hz, 1H), 4.33 (d,  $J$  = 13.2 Hz, 1H), 4.28 (d,  $J$  = 13.2 Hz, 1H), 3.74 (s, 3H), 3.21 (m, 1H), 2.88 (m, 1H), 2.53 (ddd,  $J$  = 8.2, 8.2, 1.6 Hz, 1H), 2.06 (m, 1H); <sup>13</sup>C-NMR (CDCl<sub>3</sub>, 100 MHz) for **G**  $\delta$  (ppm): 168.0, 152.6, 142.0, 130.9, 110.7, 96.3, 61.2, 51.3, 48.1, 39.0, 36.7. ESI-MS  $m/z$ : 249.1 [M + Na]<sup>+</sup>.

### The preparation of **G**<sub>1</sub>

According to the reported procedure<sup>[2]</sup>, several drops of HCl were added to the solution of **G** (500 mg) in methanol (or ethanol), and stirred at 60°C for 6 h. The solution was treated with NaHCO<sub>3</sub>, then extracted three times with EtOAc, the combined organic phases were evaporated at reduced pressure. The residue was purified by silica gel column chromatography eluting with a gradient of petroleum ether and EtOAc (1:1) to afford **G**<sub>1</sub>. When R<sup>1</sup> was CH<sub>3</sub>, **G**<sub>1-1</sub> was obtained (the ESI-MS  $m/z$ : 263.0 [M + Na]<sup>+</sup>), when R<sup>1</sup> was CH<sub>3</sub>CH<sub>2</sub>, **G**<sub>1-2</sub> was obtained (ESI-MS  $m/z$ : 277.1 [M + Na]<sup>+</sup>).

### The preparation of **G**<sub>6a</sub> and **G**<sub>6b</sub>

Dess-Martin periodinane (DMP, 883 mg, 2.08 mmol) was added to the solution of **G**<sub>1-1</sub> (500 mg, 2.08 mmol) in the dry dichloromethane, stirred at room temperature for 1h. The saturated solutions of NaHCO<sub>3</sub> and Na<sub>2</sub>S<sub>2</sub>O<sub>3</sub> were added progressively to the

mixture, then extracted three times with dichloromethane, after distillation of the dichloromethane, the residue was purified by silica gel column chromatography (petroleum ether:EtOAc = 8:1) to give **G<sub>6a-1</sub>** and **G<sub>6b-1</sub>**. **G<sub>6a-2</sub>** and **G<sub>6b-2</sub>** can be prepared in the same way. Intermediates **G<sub>6a</sub>** and **G<sub>6b</sub>** were a pair of epimer that were able to be separated by silica gel column chromatography.

<sup>1</sup>H-NMR (CDCl<sub>3</sub>, 400 MHz) for **G<sub>6a-1</sub>**  $\delta$  (ppm): 9.77 (s, 1H), 7.47 (d,  $J$  = 1.0 Hz, 1H), 6.98 (d,  $J$  = 1.7 Hz, 1H), 5.29 (d,  $J$  = 4.1 Hz, 1H), 3.73 (s, 3H), 3.48 (s, 3H), 3.34 (ddd,  $J$  = 7.8, 4.1, 1.0 Hz, 1H), 3.29 (dt,  $J$  = 3.9, 2.0 Hz, 1H), 3.01 (m, 1H), 2.57 (dddd,  $J$  = 19.5, 4.4, 2.8, 1.8 Hz, 1H). When R<sup>1</sup> was CH<sub>3</sub>, **G<sub>6a-1</sub>** was obtained (ESI-MS  $m/z$ : 261.1 [M + Na]<sup>+</sup>; **G<sub>6b-1</sub>** was obtained (ESI-MS  $m/z$ : 261.1 [M + Na]<sup>+</sup>). When R<sup>1</sup> was CH<sub>3</sub>CH<sub>2</sub>, **G<sub>6a-2</sub>** was obtained (ESI-MS  $m/z$ : 275.0 [M + Na]<sup>+</sup>); **G<sub>6b-2</sub>** was obtained (ESI-MS  $m/z$ : 275.0 [M + Na]<sup>+</sup>).

### The preparation of **G<sub>1a</sub>** and **G<sub>1b</sub>**

**G<sub>6a-2</sub>** (546 mg, 2.16 mmol) was dissolved in MeOH, then NaBH<sub>4</sub> (90 mg, 2.38 mmol) was added to the solution and stirred at room temperature for 30 minutes, then extracted three times with EtOAc, the combined organic phases were evaporated at reduced pressure. The residue was purified by silica gel column chromatography (petroleum ether: EtOAc = 4:1) to give **G<sub>1a-2</sub>**. And other intermediates **G<sub>1a-1</sub>**, **G<sub>1b-1</sub>** and **G<sub>1b-2</sub>** can be got in the same way.

<sup>1</sup>H-NMR (CDCl<sub>3</sub>, 400 MHz) for **G<sub>1a-2</sub>**  $\delta$  (ppm): 7.52 (s, 1H), 5.84 (s, 1H), 4.55 (d,  $J$  = 8.4 Hz, 1H), 4.26 (s, 2H), 4.14 (m, 1H), 3.73 (s, 3H), 3.64 (m, 1H), 3.22 (d,  $J$  = 8.6 Hz, 1H), 3.18 (d,  $J$  = 8.6 Hz, 1H), 2.88 (m, 1H), 2.68 (br s, 1H), 2.59 (t,  $J$  = 8.2 Hz, 1H), 2.07 (m, 1H), 1.80 (t,  $J$  = 6.8 Hz, 3H). ESI-MS  $m/z$ : 277.1 [M + Na]<sup>+</sup>.

$^1\text{H-NMR}$  ( $\text{CDCl}_3$ , 400 MHz) for  $\text{G}_{1b-2}$   $\delta$  (ppm): 7.46 (s, 1H), 5.76 (s, 1H), 5.11 (d,  $J$  = 2.8 Hz, 1H), 4.26 (d,  $J$  = 13.2 Hz, 1H), 4.18 (d,  $J$  = 13.2 Hz, 1H), 3.88 (m, 1H), 3.72 (s, 1H), 3.57 (s, 1H), 3.15 (m, 2H), 2.75 (m, 1H), 2.36 (br s, 1H), 2.25 (m, 1H), 1.21 (t,  $J$  = 7.0 Hz, 3H); ESI-MS  $m/z$ : 277.1  $[\text{M} + \text{Na}]^+$ .

### The preparation of $\text{G}_2$

$\text{G}$  (501 mg, 2.21 mmol), imidazole (301 mg, 4.43 mmol) were added into a flask in dry THF under the condition of ice-bath, the solution of TBS-Cl in dry THF was injected slowly into the mixture, then stirred at room temperature, monitored by TLC. The residue was obtained after distillation under reduced pressure, then purified by silica gel column chromatography (petroleum ether:EtOAc = 10:1) to give  $\text{G}_{2m}$  (ESI-MS  $m/z$ : 363.2  $[\text{M} + \text{Na}]^+$ ). Dess-Martin periodinane (451 mg, 1.06 mmol) was added to the solution of  $\text{G}_{2m}$  (181 mg, 0.532 mmol) in dry dichloromethane, stirred at room temperature, monitored by TLC<sup>[6]</sup>. The saturated solution of  $\text{Na}_2\text{S}_2\text{O}_3$  was added progressively to the mixture, then extracted three times with diethyl ether, the combined organic phases were evaporated at reduced pressure. The residue was purified by silica gel column chromatography (petroleum ether:EtOAc = 10:1) to offer  $\text{G}_2$  (ESI-MS  $m/z$ : 361.1  $[\text{M} + \text{Na}]^+$ ).

### The preparation of $\text{G}_3$

$\text{G}_{1a-1}$  (200 mg, 0.832 mmol) and  $\text{Ph}_3\text{P}$  (251 mg, 0.957 mmol) were added into a flask in dry dichloromethane, the solution of  $\text{CBr}_4$  (317 mg, 0.957 mmol) in dry dichloromethane<sup>[3]</sup> was injected into the flask and stirred at room temperature under  $\text{N}_2$  atmosphere, monitored by TLC. The residue was obtained after distillation under reduced pressure, then purified by silica gel column chromatography (petroleum ether:EtOAc = 10:1) to give  $\text{G}_3$ .



### The preparation of **G<sub>4</sub>**

**G<sub>1a-1</sub>** (50 mg, 0.222 mmol) and triethylamine (37  $\mu$ L, 0.266 mmol) were added into a flask in dry THF, and acrylylchloride (18  $\mu$ L, 0.224 mmol) was added and stirred at room temperature for 4h<sup>[4]</sup>. Then extracted three times with EtOAc, the combined organic phases were evaporated at reduced pressure. The residue was purified by silica gel column chromatography (petroleum ether:EtOAc = 4:1) to offer **G<sub>4</sub>**.

**G<sub>4</sub>**: ESI-MS  $m/z$ : 317.0 [M +Na]<sup>+</sup>.

### The preparation of **G<sub>5</sub>**

**G<sub>1a-1</sub>** (140 mg, 0.588 mmol), phthalimide (111 mg, 0.756 mmol), Ph<sub>3</sub>P (196 mg, 0.756 mmol) were added into a flask in dry THF. Diisopropyl azodiformate (153 $\mu$ L, 1.164 mmol) was injected into the solution and stirred at room temperature for 1h<sup>[5]</sup>, then extracted three times with EtOAc, the combined organic phases were evaporated at reduced pressure. The residue was purified by silica gel column chromatography (petroleum ether:EtOAc = 8:1) to give **G<sub>5m</sub>**. 80% hydrazinehydrate (127  $\mu$ L) was added to the solution of **G<sub>5m</sub>** (130 mg, 0.548 mmol) in EtOH and stirred overnight. After filtration and distillation under reduced pressure, the residue was purified with preparative TLC (EtOAc:MeOH:Et<sub>2</sub>NH = 60:5:1) to provide **G<sub>5-1</sub>** (ESI-MS  $m/z$ : 240.1 [M + H]<sup>+</sup>). **G<sub>5-2</sub>** can be obtained in the same way by using **G<sub>1a-2</sub>**.

### The preparation of **G<sub>7a</sub>**

The aqueous solution of NaOH (1.5 mL, 1M) was added to the solution of **G<sub>1a-2</sub>** (30 mg) in THF, stirred at room temperature for 24 h. The pH of the solution was adjusted to around 5 by progressively adding 10% HCl, then extracted three times with ethyl

acetate. The combined organic phases were evaporated at reduced pressure. The residue was purified with silica gel column chromatography (petroleum ether:EtOAc AcOH = 100:50:3) to give **G<sub>7a</sub>**.

#### **The preparation of **M<sub>14</sub>****

Thionyl chloride (180  $\mu$ L, 0.297 mmol) was added dropwisely to the solution of tryptophan (200 mg, 0.979 mmol) in dry MeOH under the condition of ice-bath, then heated to reflux, monitored by TLC. **M<sub>14</sub>** was obtained after distillation under reduced pressure (**M<sub>14</sub>**: ESI-MS  $m/z$ : 219.1 [**M** + H]<sup>+</sup>).

#### **The preparation of **M<sub>15</sub>****

NaBH<sub>4</sub> (600 mg, 15.9 mmol) was added gradually to the solution of **M<sub>14</sub>** (300 mg, 1.18 mmol) in EtOH/H<sub>2</sub>O (V/V = 1:1), stirred at room temperature for 11h, then extracted three times with CHCl<sub>3</sub>. The combined organic phases were evaporated at reduced pressure to give **M<sub>15</sub>** (ESI-MS  $m/z$ : 189.1 [**M** – H]<sup>–</sup>).

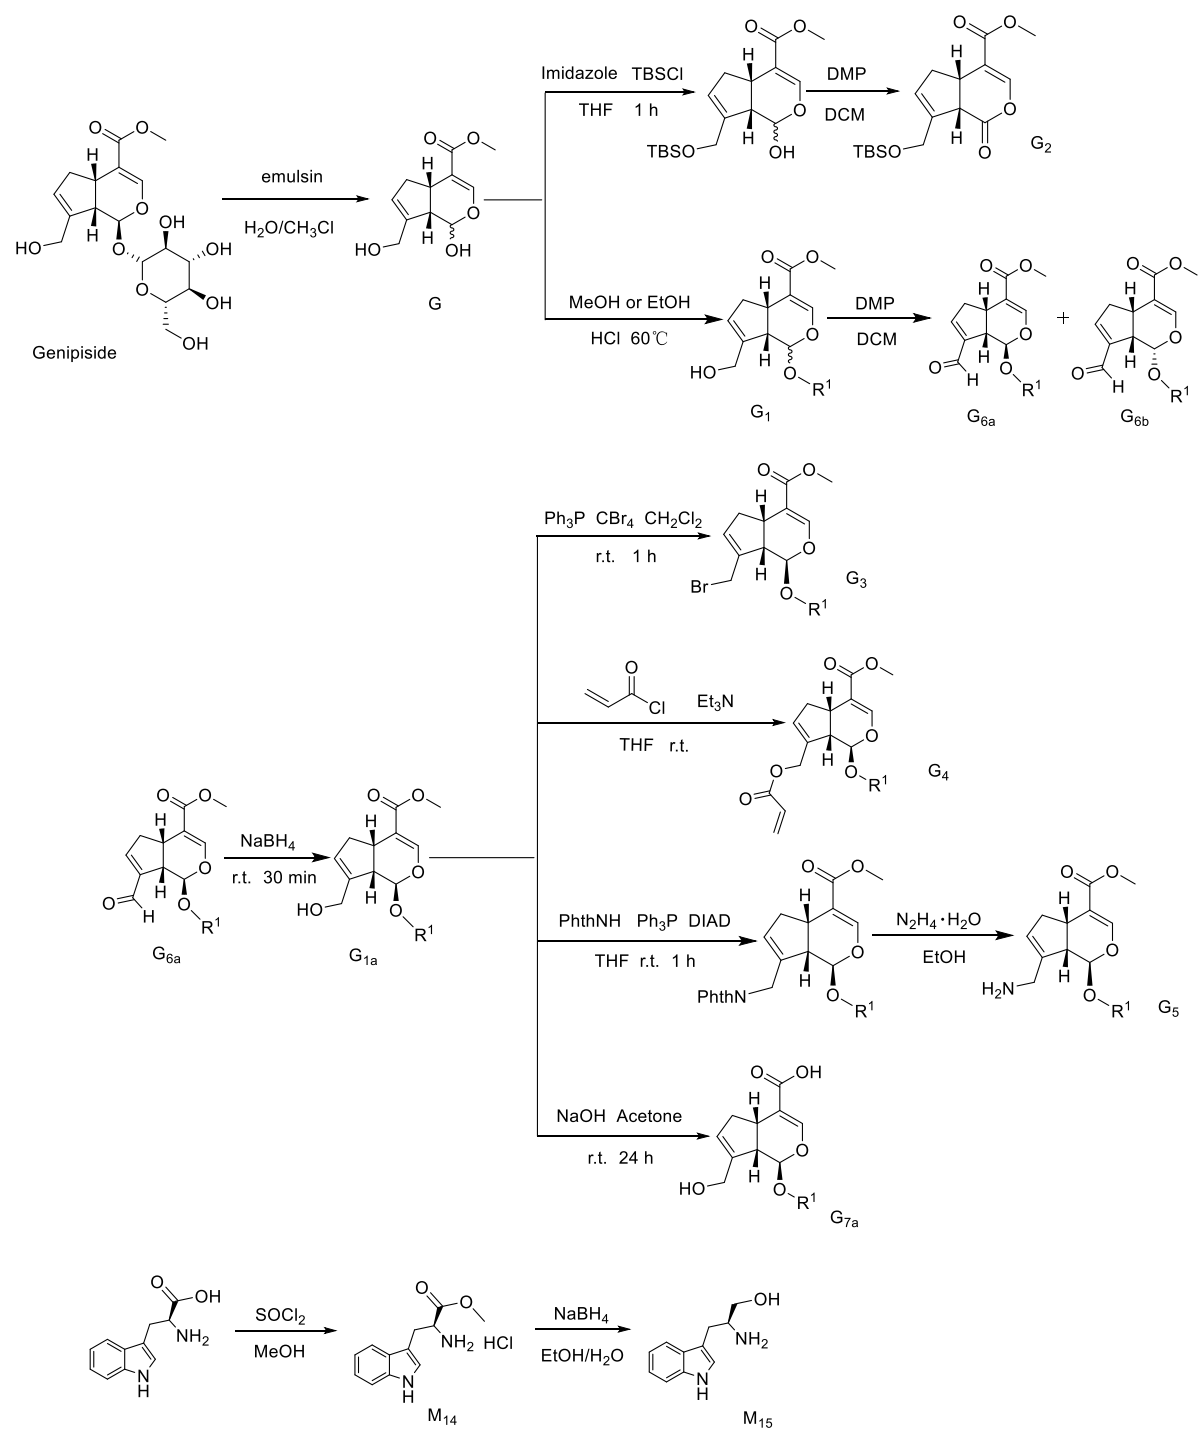

Scheme 1. Synthesis routes of intermediates.

## References

- [1] Yang Yi-Shun, Zhang Tong, Yu Shai-Cheng, Transformation of geniposide into genipin by immobilized  $\beta$ -glucosidase in a two-phase aqueous-organic system, *Molecules*. 2011, 16(5): 4295 - 4304.
- [2] Hirokazu Suzuki, Matsumi Yamazaki, Kenzo Chiba, Neuritogenic activities of 1-alkyloxygenipins, *Chem.Parm.Bull.* 2010, 58(2):168-171.
- [3] Mori Miwako, Kuzuba Yuichi, Kitamura Tsuyoshi, Ruthenium-Catalyzed ROM-RCM of Cycloalkene-yne, *Org. Lett.* 2002, 4(22): 3855 - 3858.
- [4] Takayoshi Arai, Tetuya Sekiguti, Kazuhiro Otsuki, "Catalyst Analogue": A Concept for Constructing Multicomponent Asymmetric Catalysts (MAC) by Using a Polymer Support, *Angew. Chem. Int. Ed.* 2003(42):2144-2147.
- [5] Burgess Kevin, Linthicum D. Scott, Shin Hunwoo, Festphasensynthese nicht natuerlicher Biopolymere mit sich wiederholenden Harnstoffeinheiten, *Angewandte Chemie*. 1995, 107(8): 975 - 977.
- [6] Miura, Okajima, Hondo, Acid-catalyzed cyclization of vinylsilanes bearing a hydroxy group: A new method for stereoselective synthesis of disubstituted tetrahydrofurans, *J. Am. Chem. Soc.* 2000, 122(46): 11348 - 11357.

**<sup>1</sup>H and <sup>13</sup>C-NMR, and HR-MS spectra for compounds 1–34.**

<sup>1</sup>H-NMR of compound **1**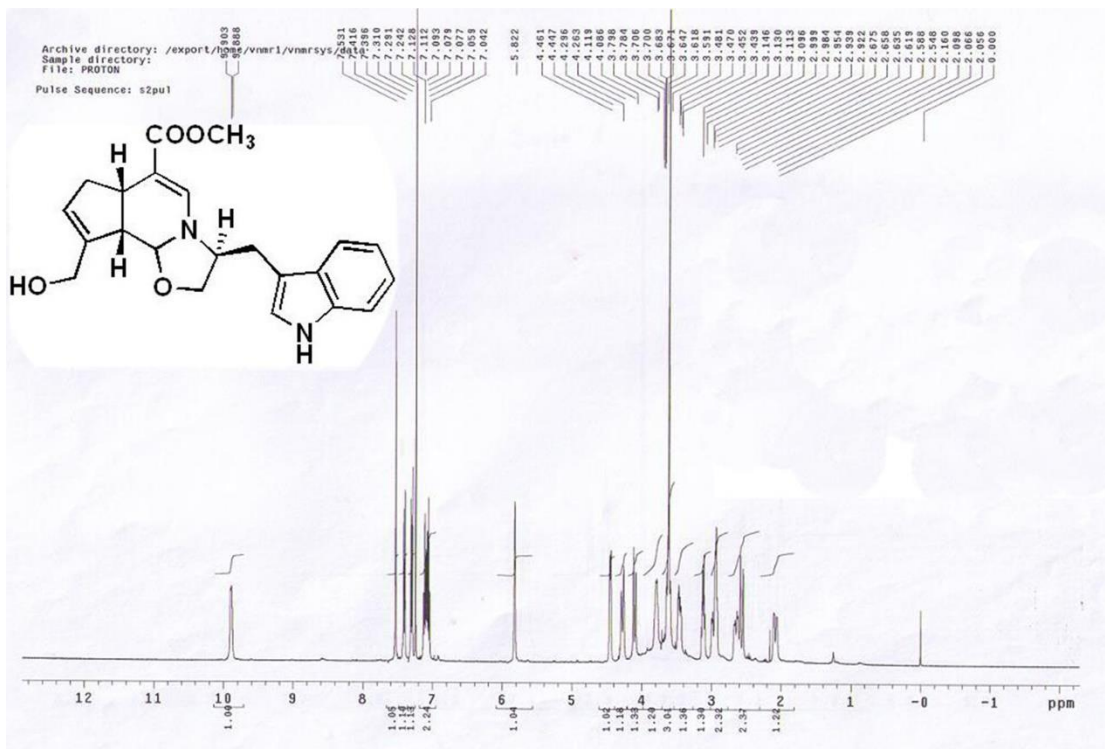 $^{13}\text{C}$ -NMR of compound **1**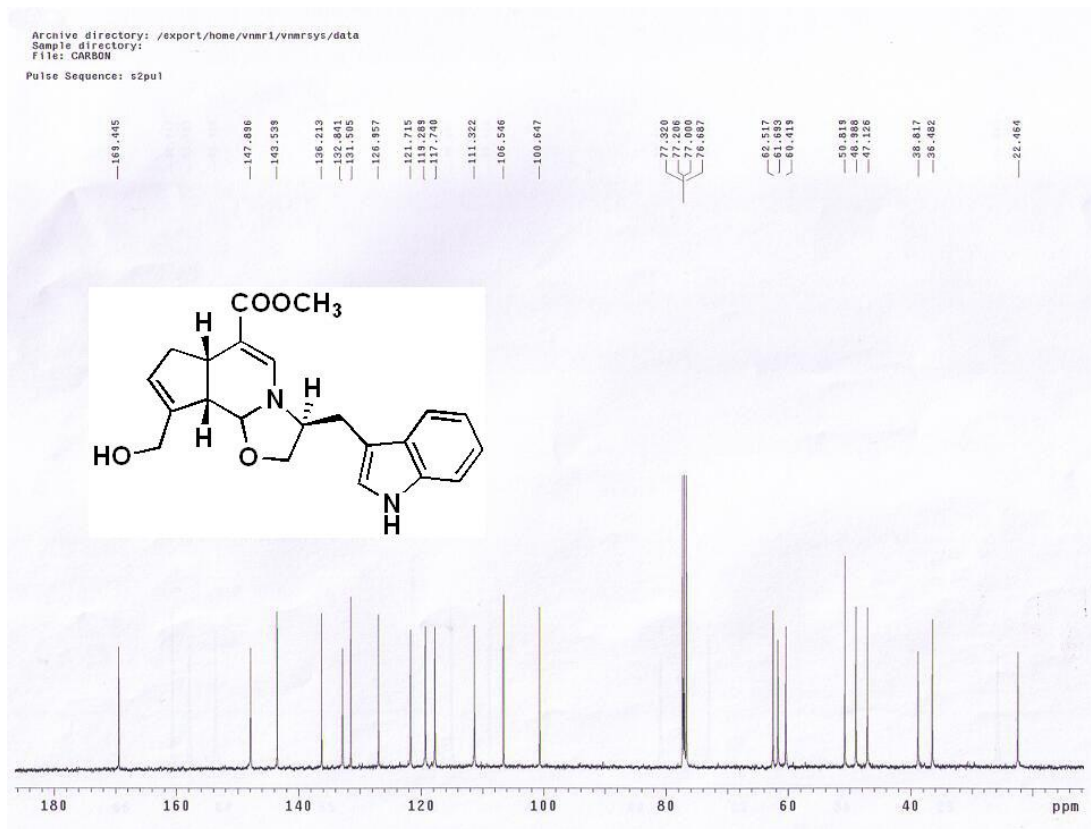

# HR-EI-MS of compound 1

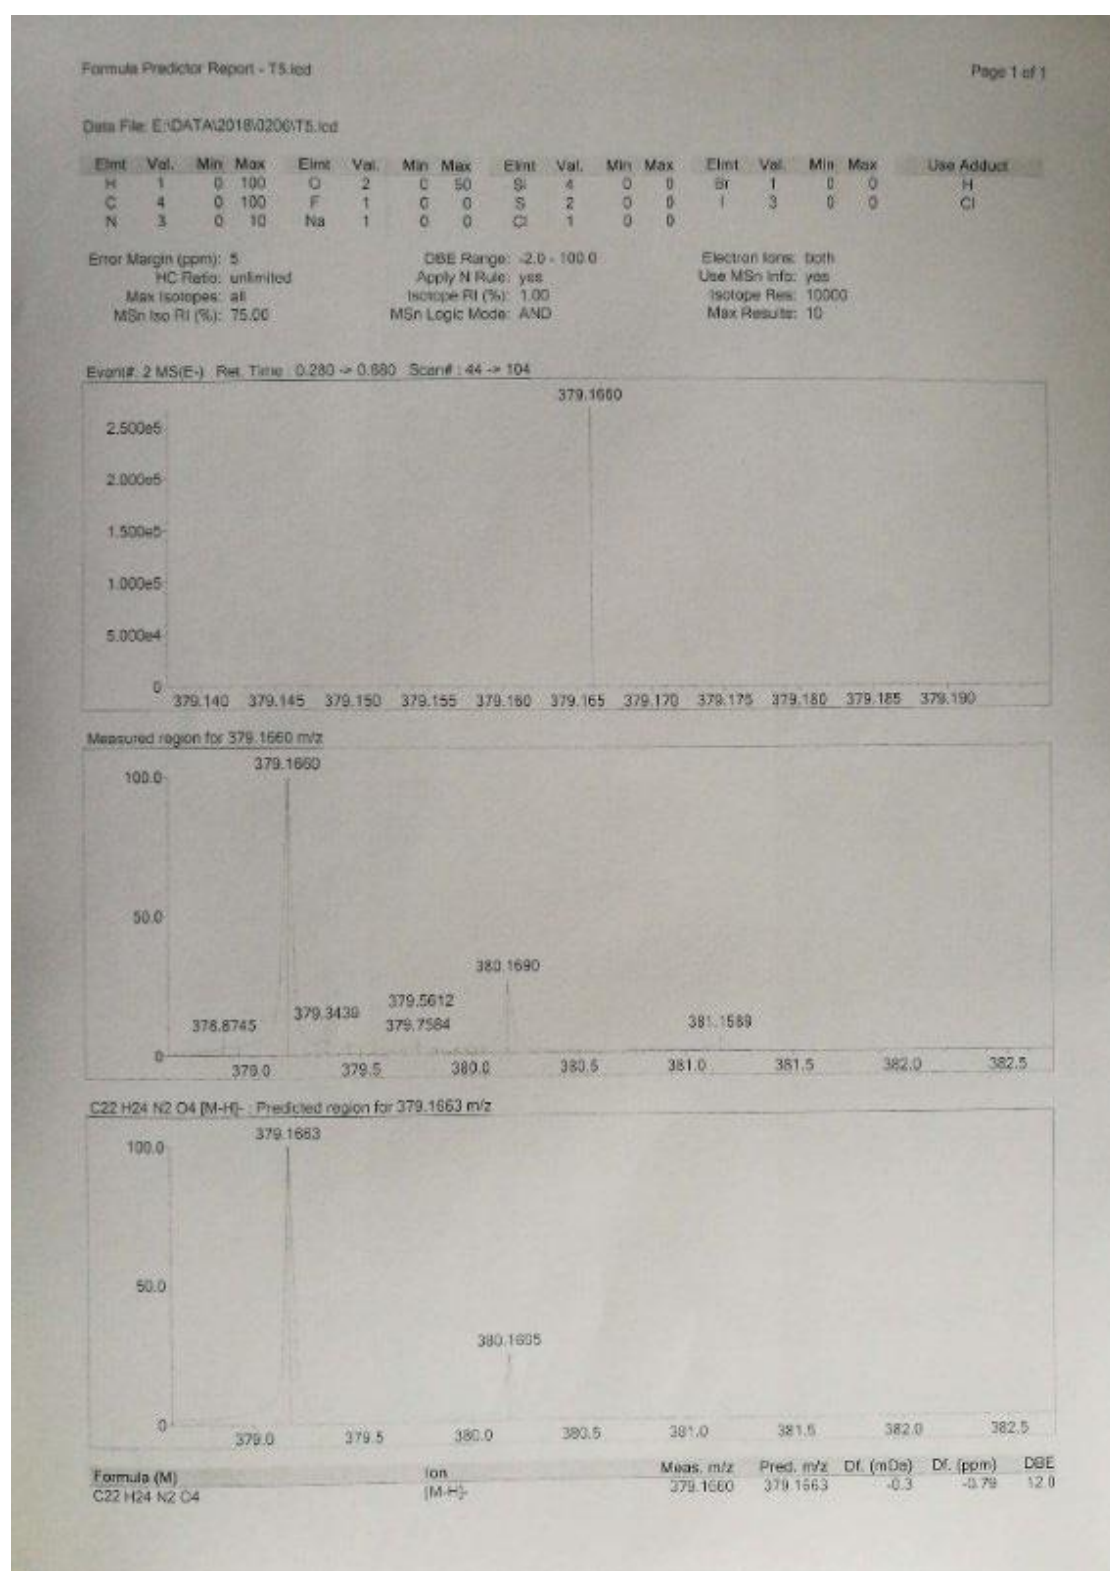

### <sup>1</sup>H-NMR of compound 2

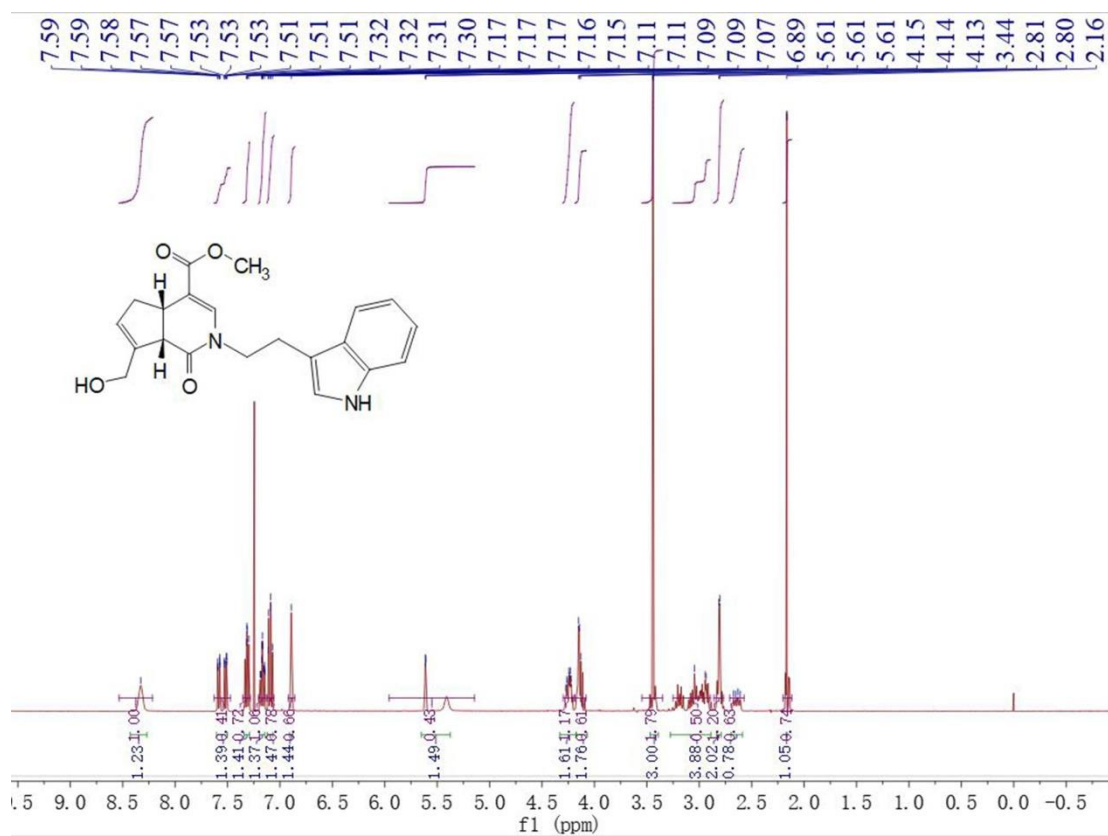

### <sup>13</sup>C-NMR of compound 2

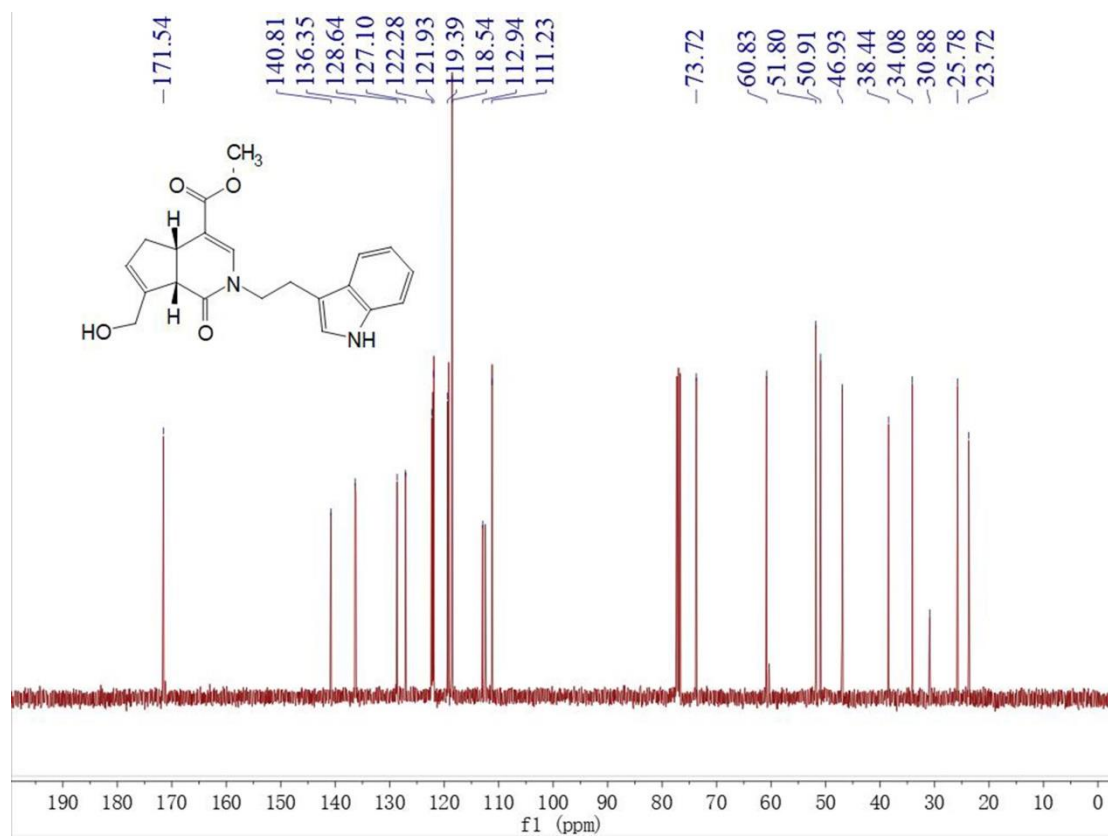

## HR-EI-MS of compound 2

### Elemental Composition Report

Page 1

#### Single Mass Analysis

Tolerance = 10.0 PPM / DBE: min = -10.0, max = 120.0

Selected filters: None

Monoisotopic Mass, Odd and Even Electron Ions

16 formula(e) evaluated with 1 results within limits (up to 51 closest results for each mass)

Elements Used:

C: 0-200 H: 0-400 N: 2-2 O: 3-5

T6

15:38:16 07-Feb-2018

Voltage EI+

K1B  
M180226EA-01AFAMM 43 (3.948)  
366.1579

Autospec Premier  
P776  
226

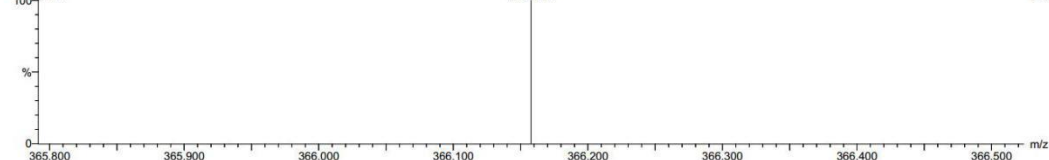

|          |            |      |       |      |           |               |  |
|----------|------------|------|-------|------|-----------|---------------|--|
| Minimum: | 200.0      | 10.0 | -10.0 |      |           |               |  |
| Maximum: |            |      | 120.0 |      |           |               |  |
| Mass     | Calc. Mass | mDa  | PPM   | DBE  | i-FIT     | Formula       |  |
| 366.1579 | 366.1580   | -0.1 | -0.3  | 12.0 | 5546126.5 | C21 H22 N2 O4 |  |

## <sup>1</sup>H-NMR of compound 3

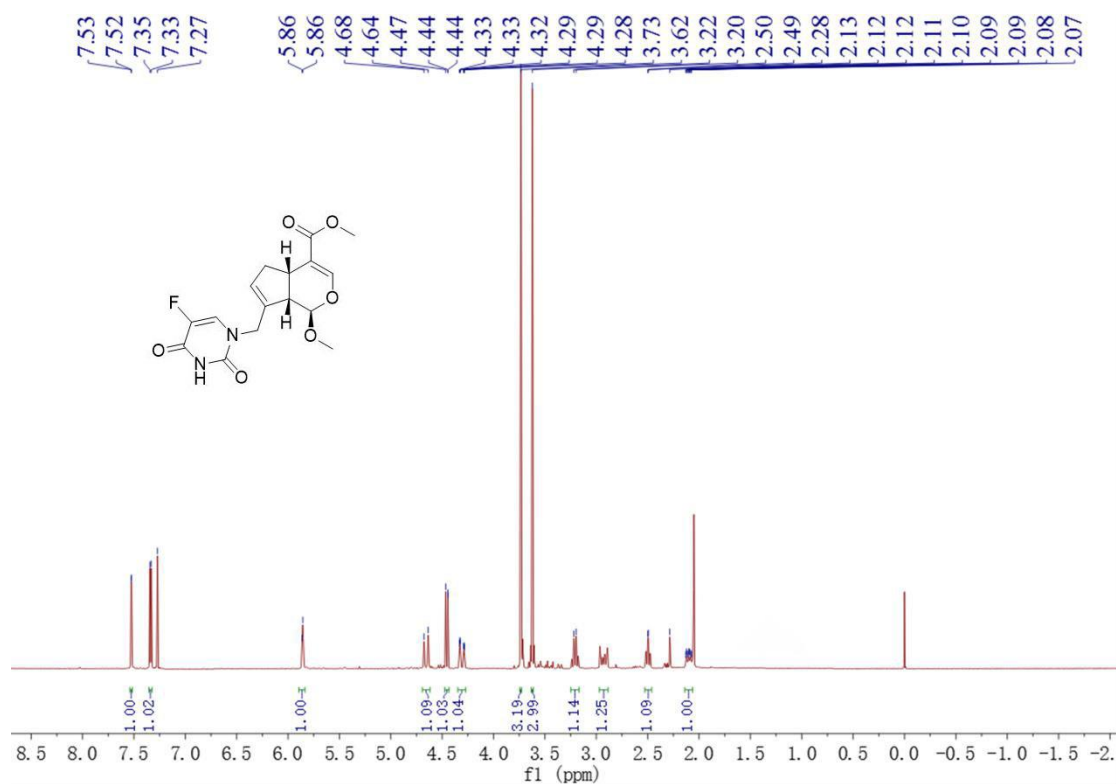



### $^{13}\text{C}$ -NMR of compound **3**

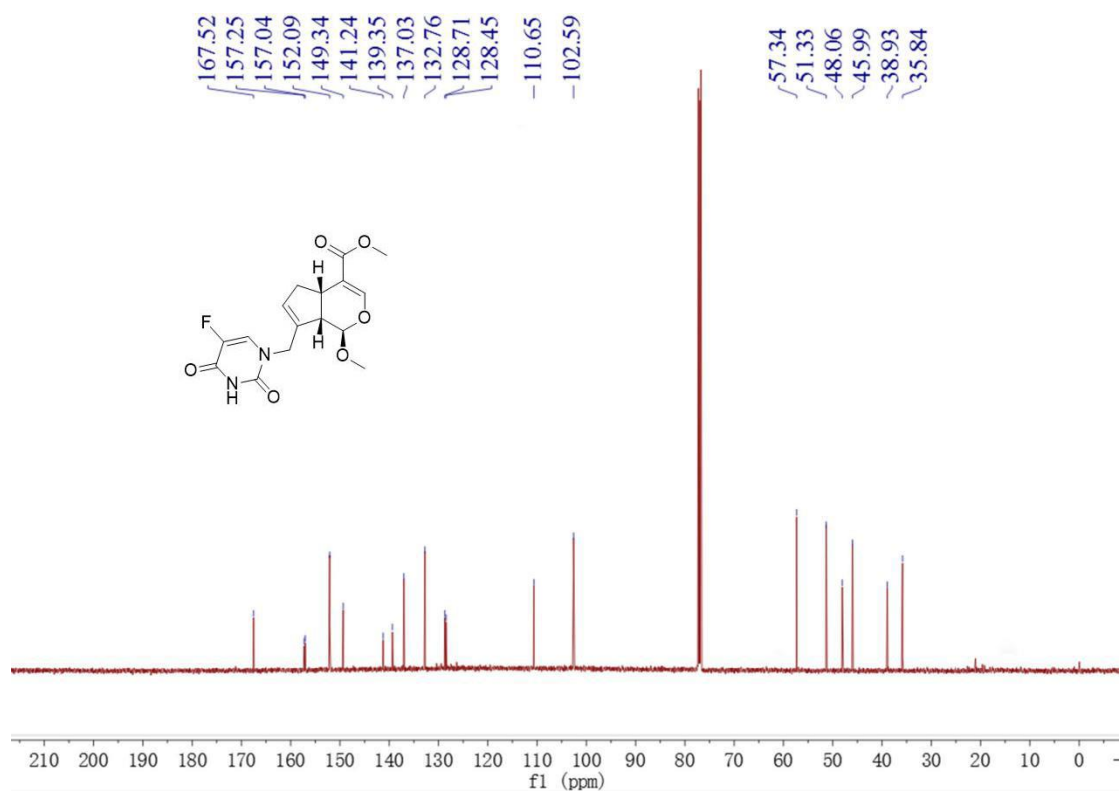

### HR-EI-MS of compound **3**

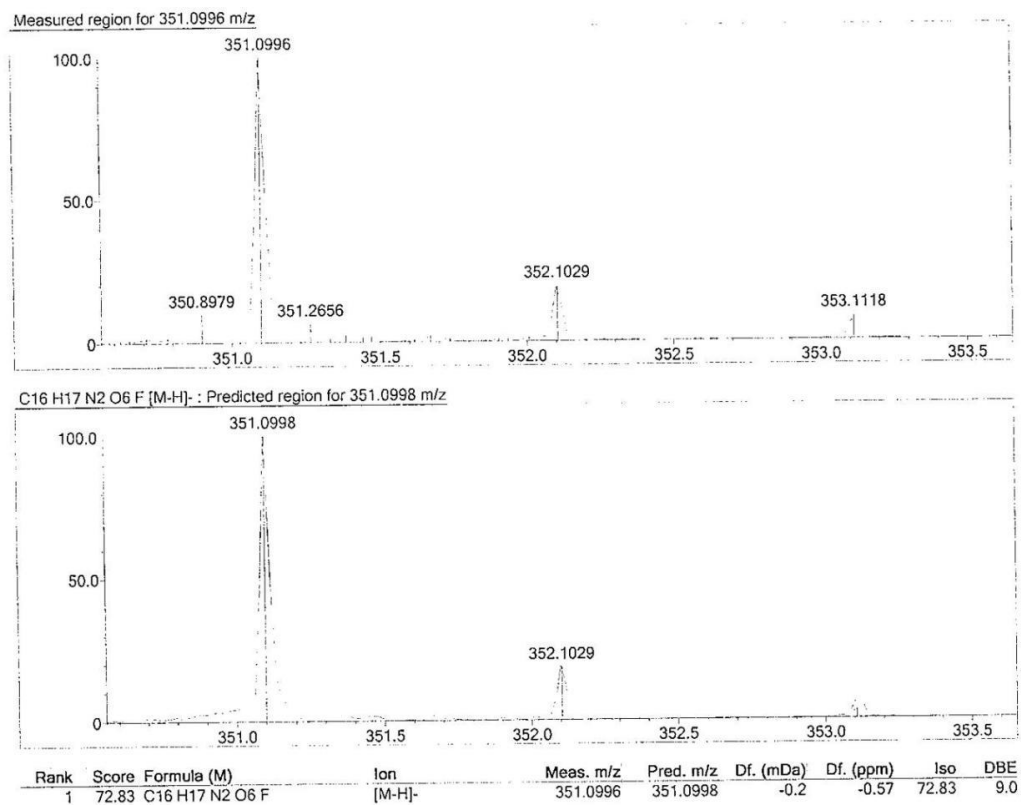

# <sup>1</sup>H-NMR of compound **4**

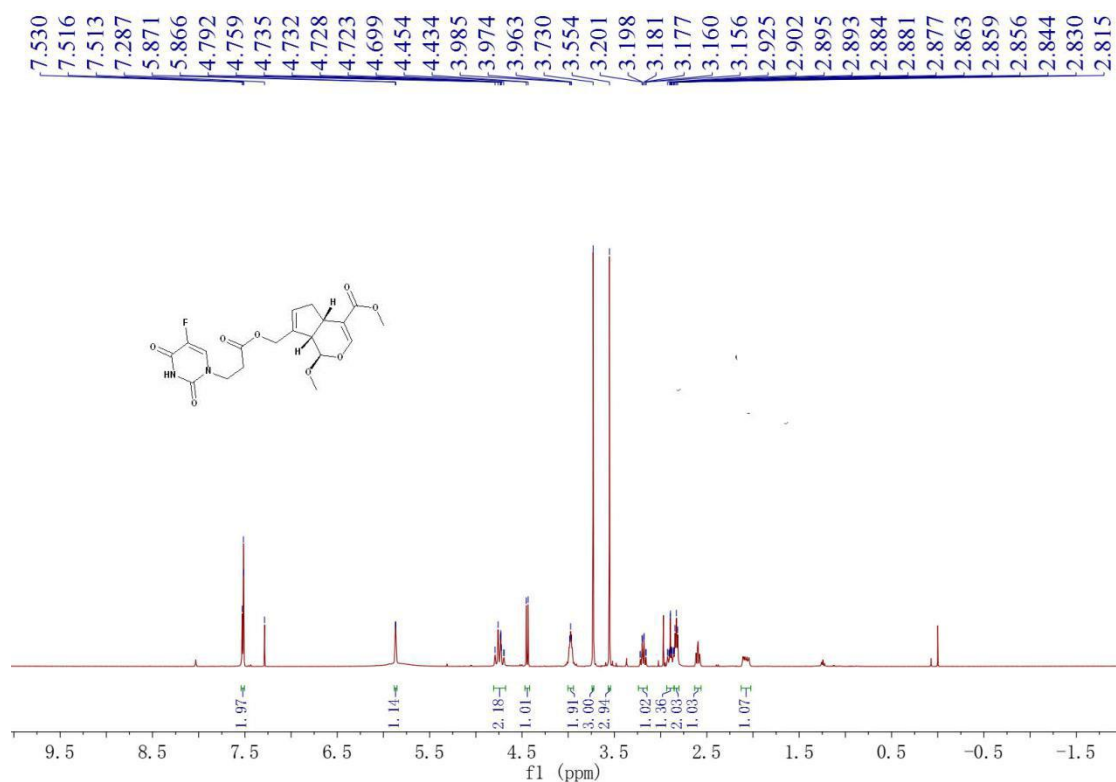

# <sup>13</sup>C-NMR of compound **4**

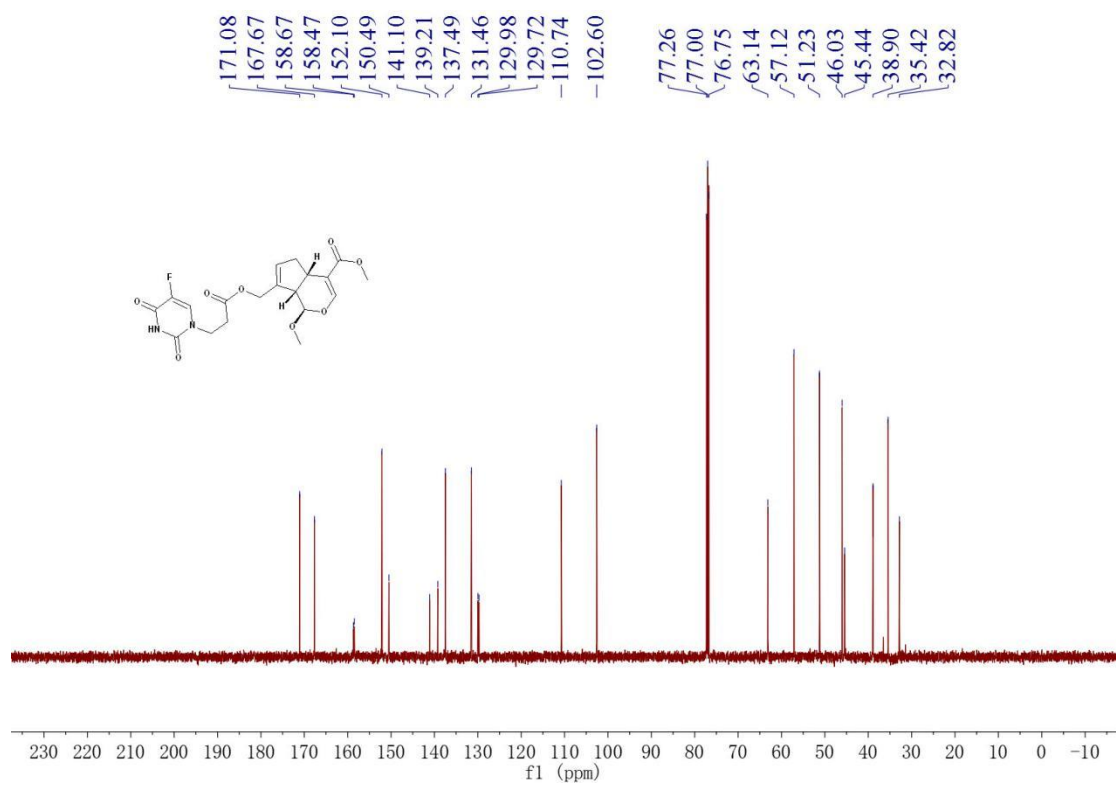

## HR-EI-MS of compound 4

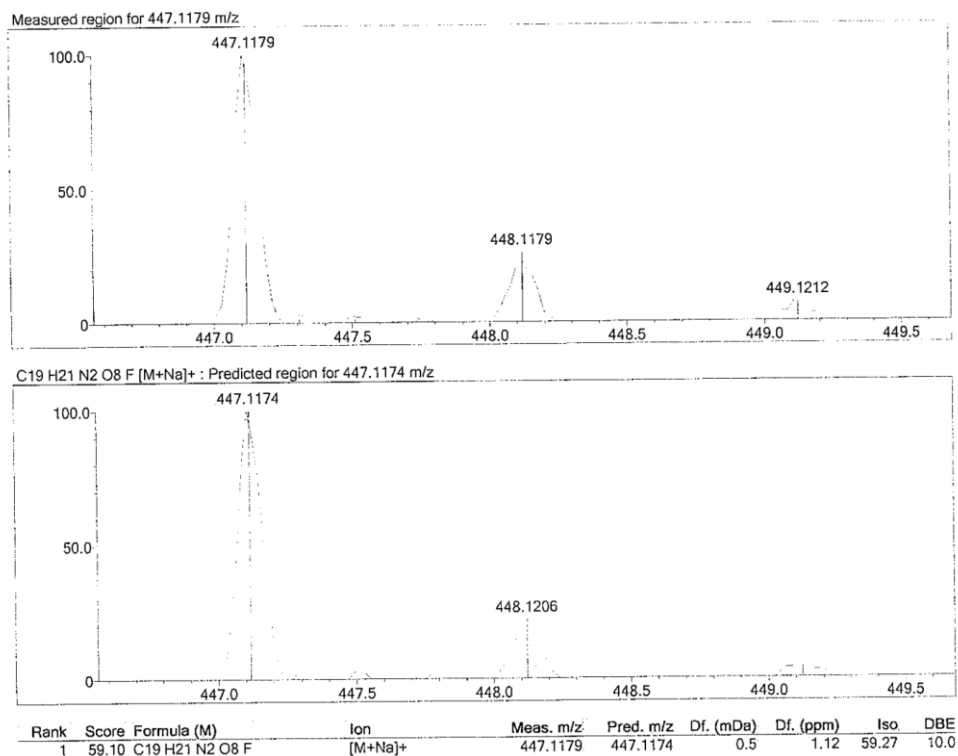

## <sup>1</sup>H-NMR of compound 5

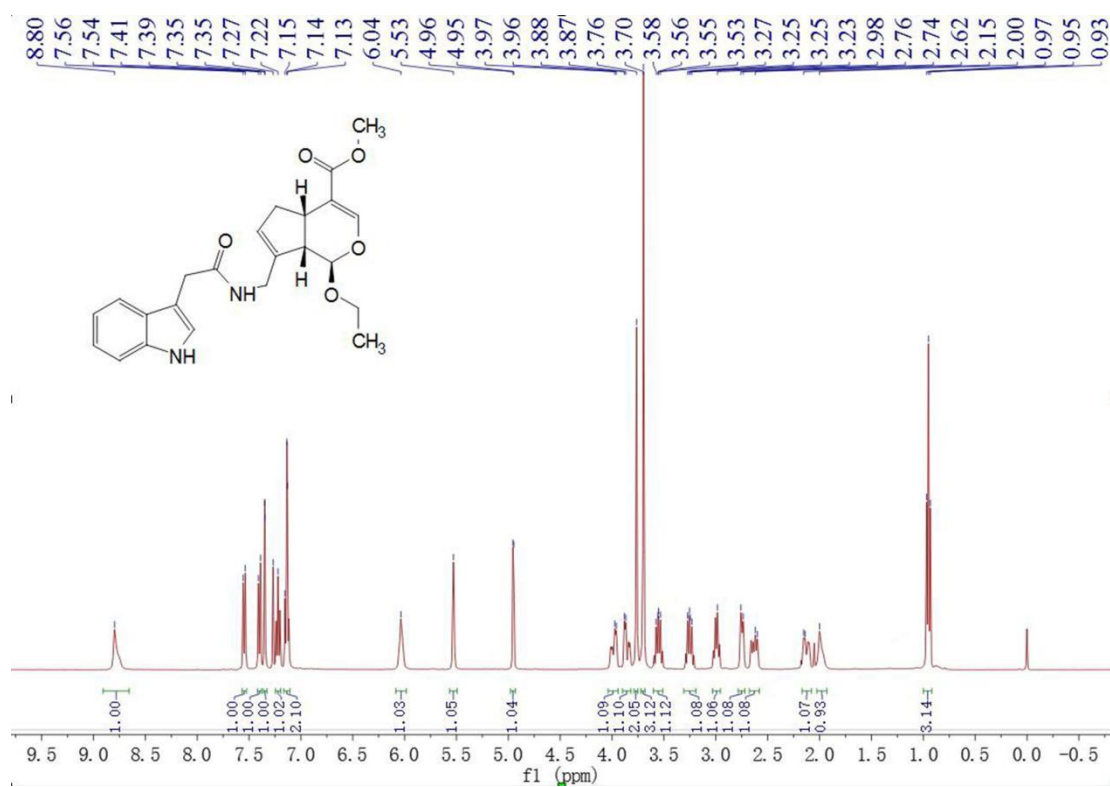

# <sup>13</sup>C-NMR of compound 5

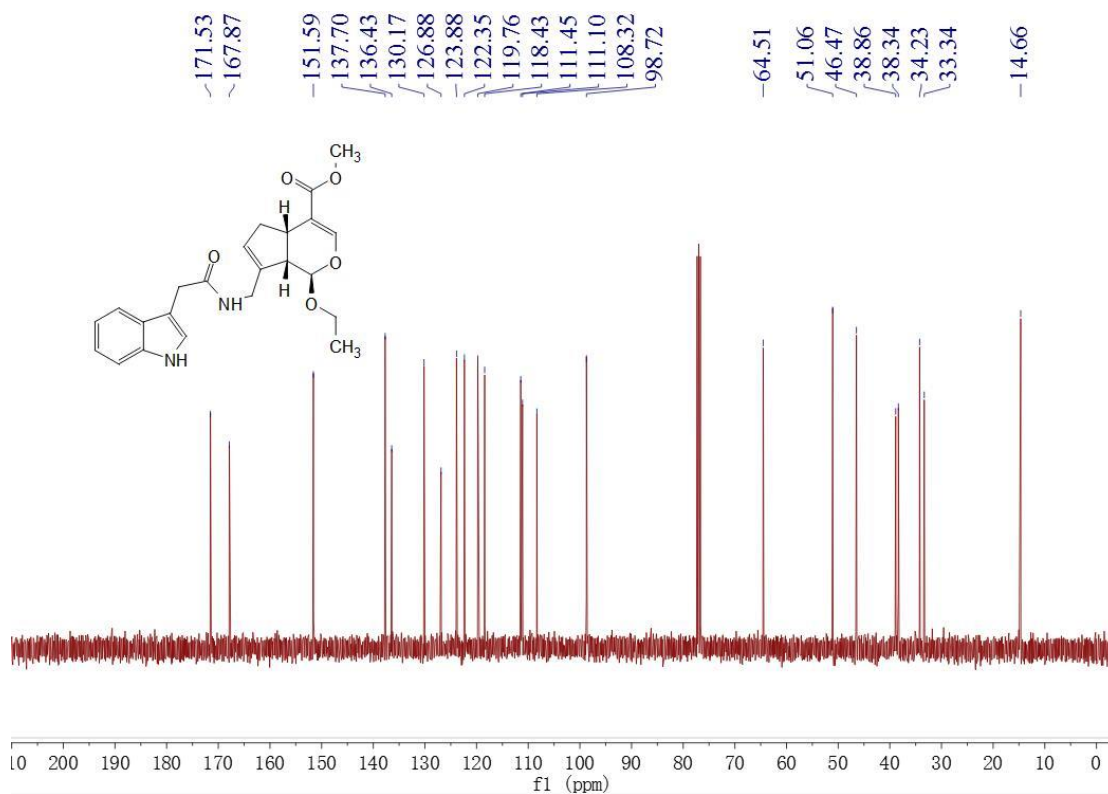

# HR-EI-MS of compound 5

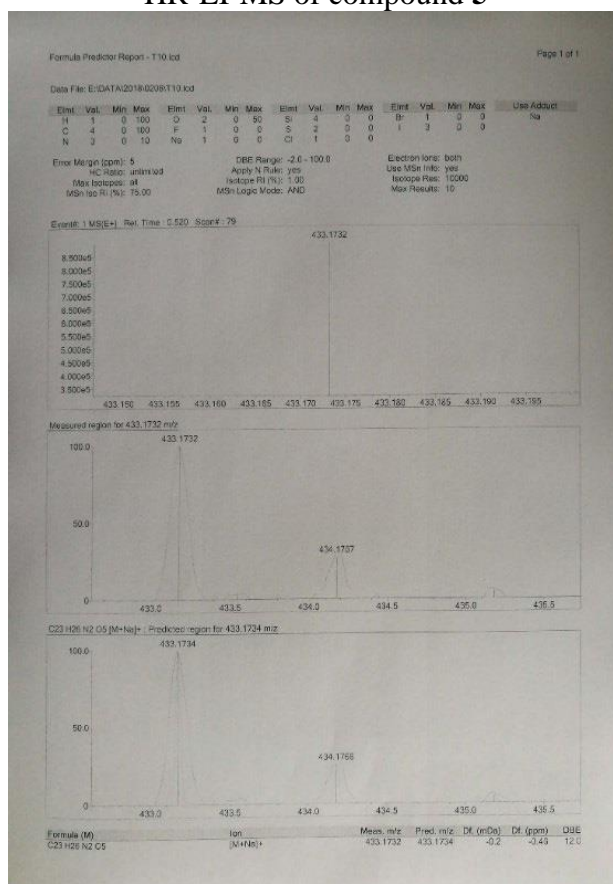

### <sup>1</sup>H-NMR of compound 6

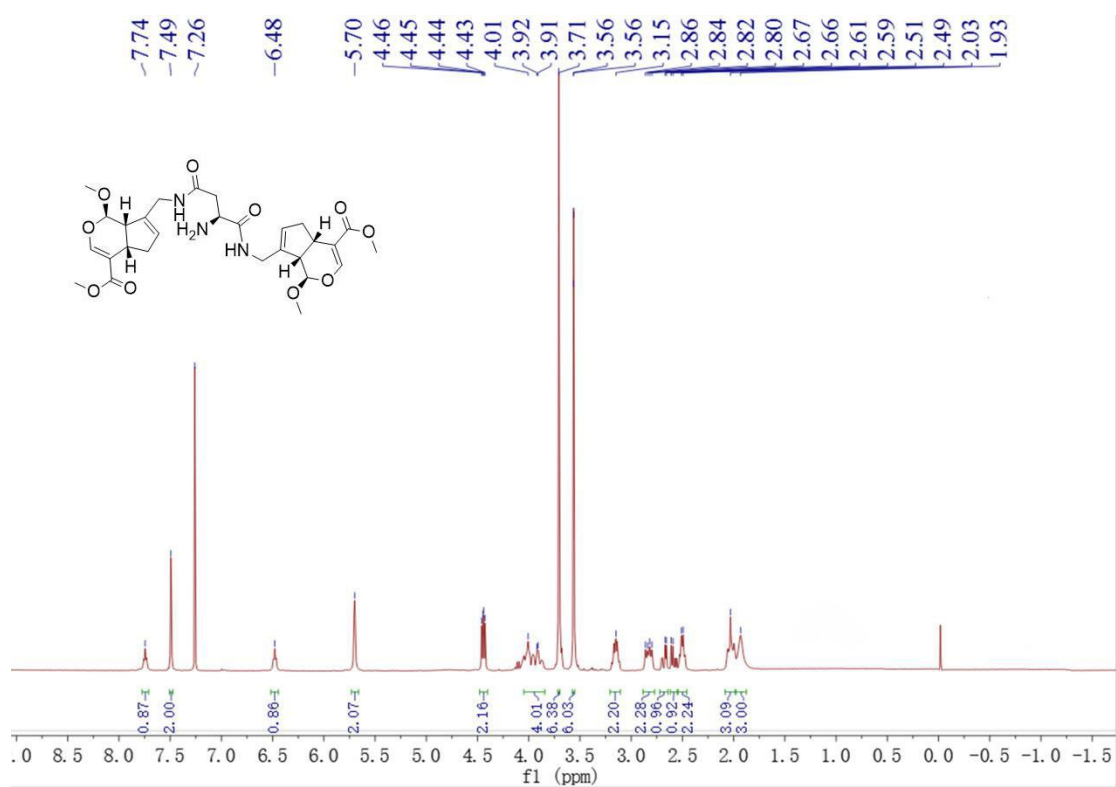

### <sup>13</sup>C-NMR of compound 6

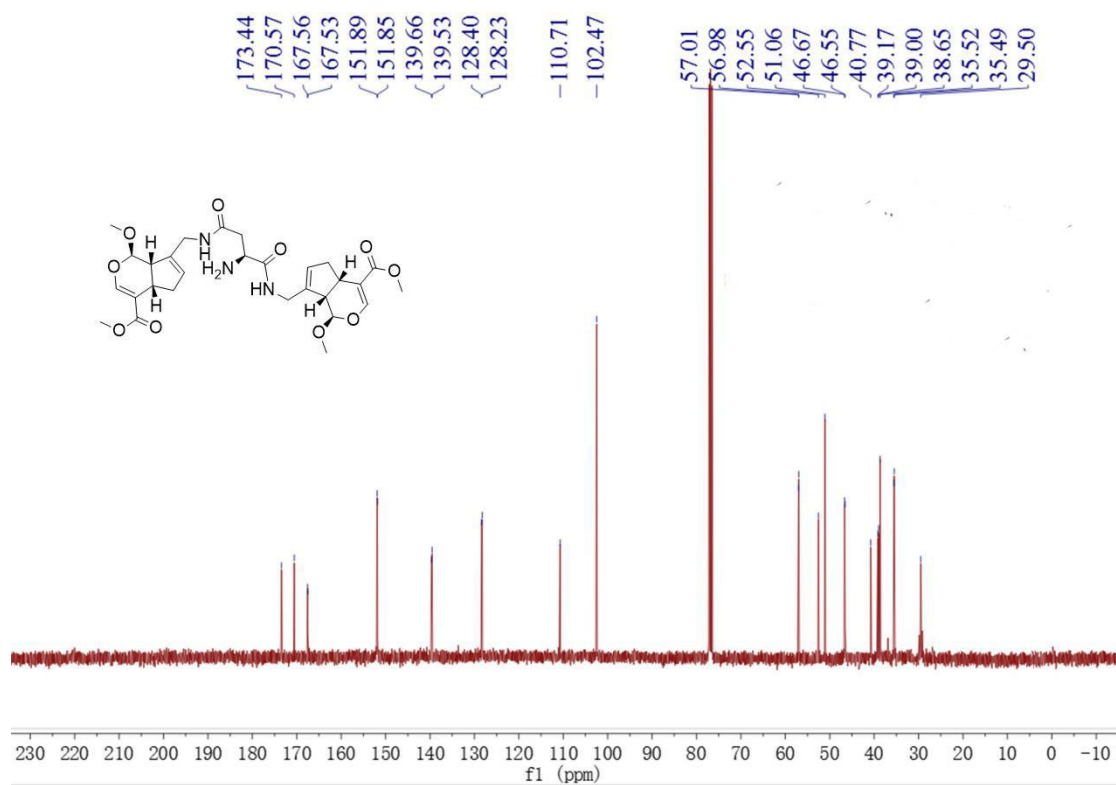

## HR-EI-MS of compound 6

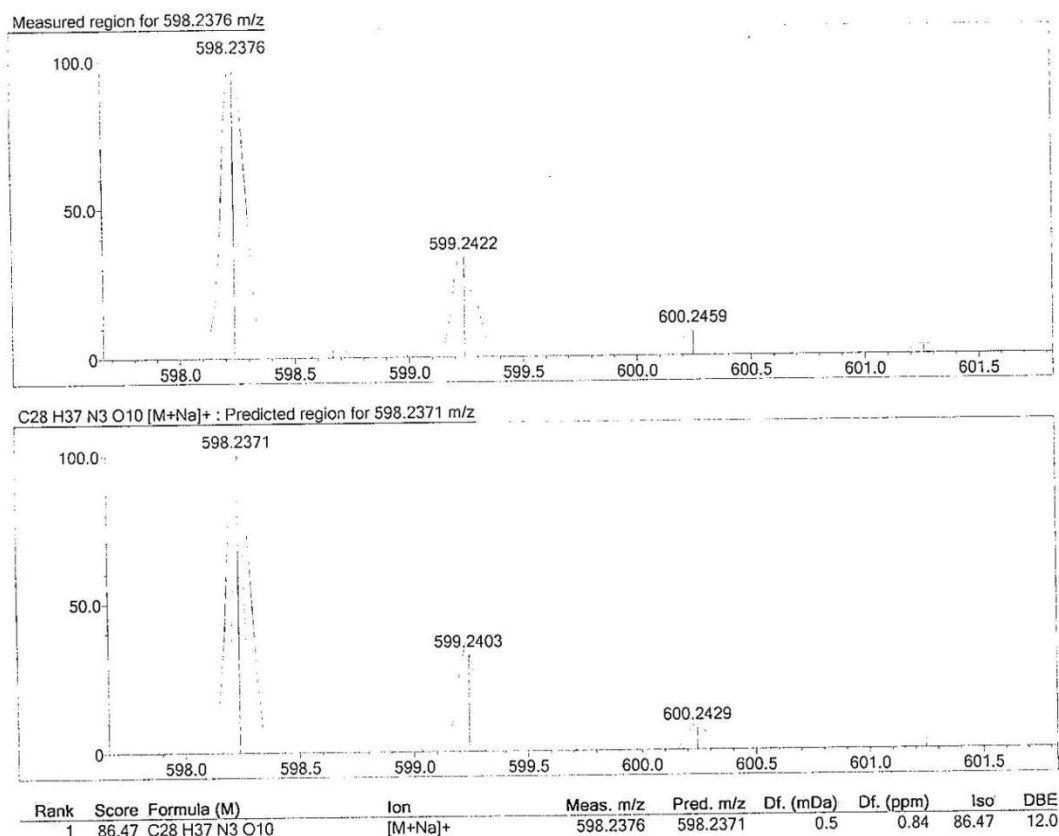

## <sup>1</sup>H-NMR of compound 7

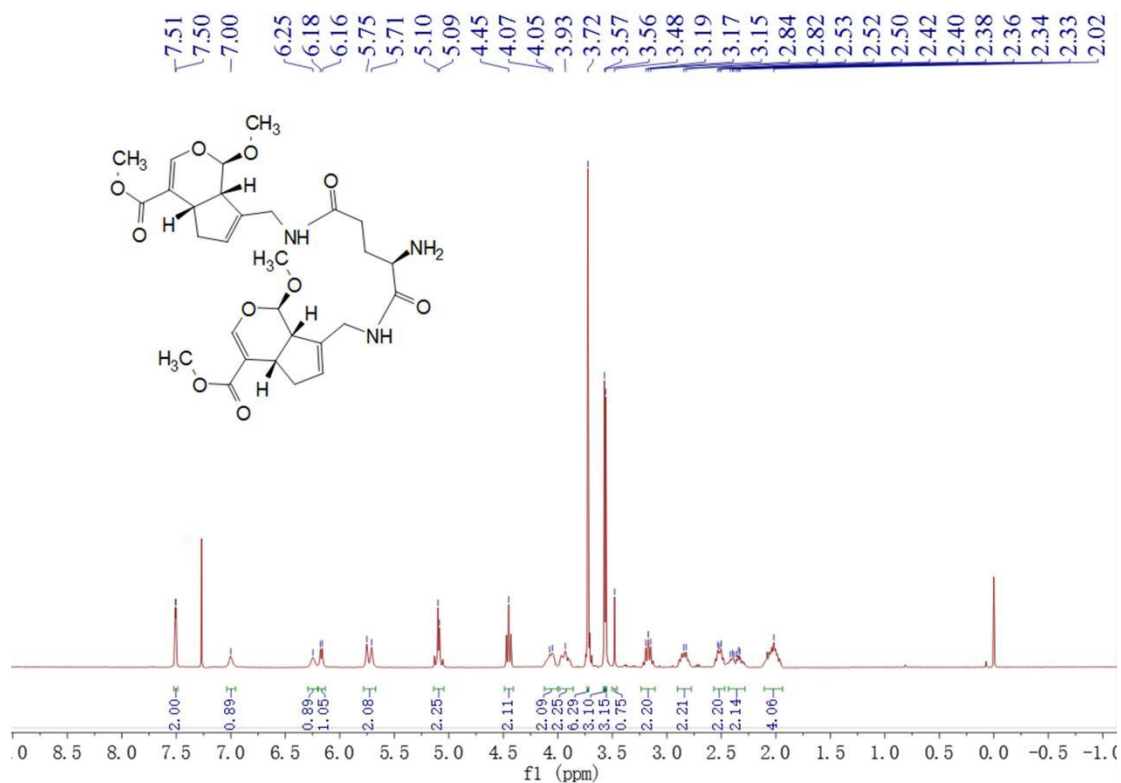

<sup>13</sup>C-NMR of compound **7**

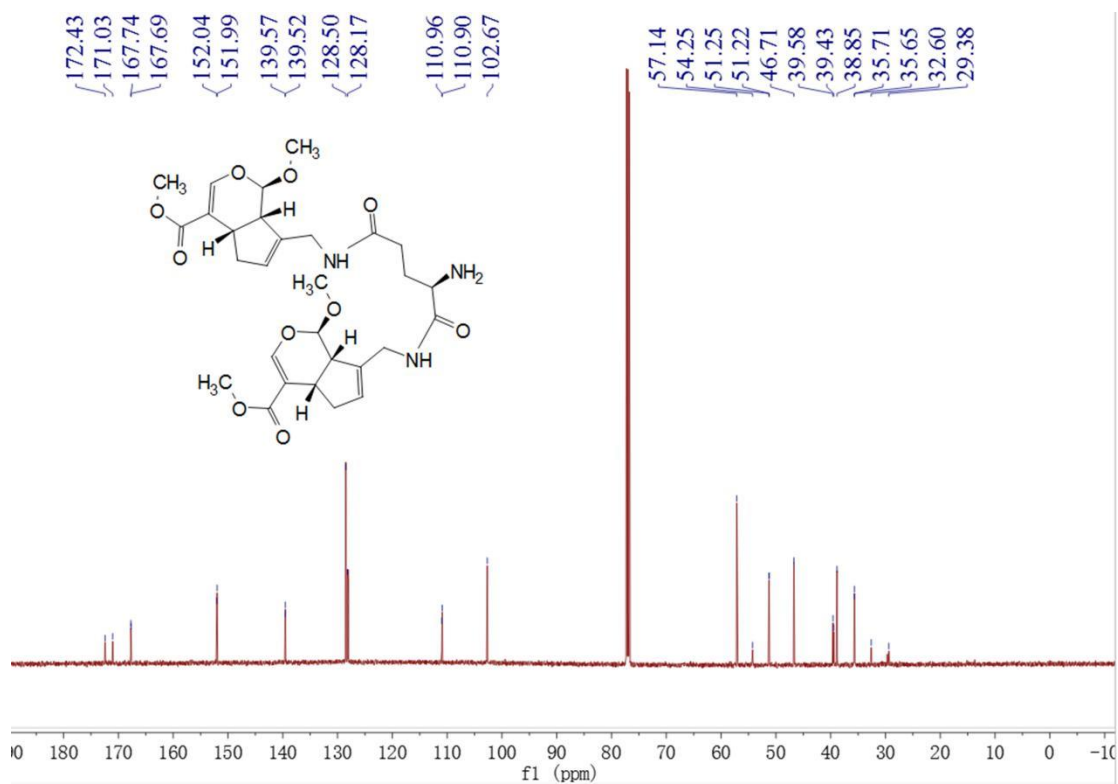

<sup>1</sup>H-NMR of compound **8**

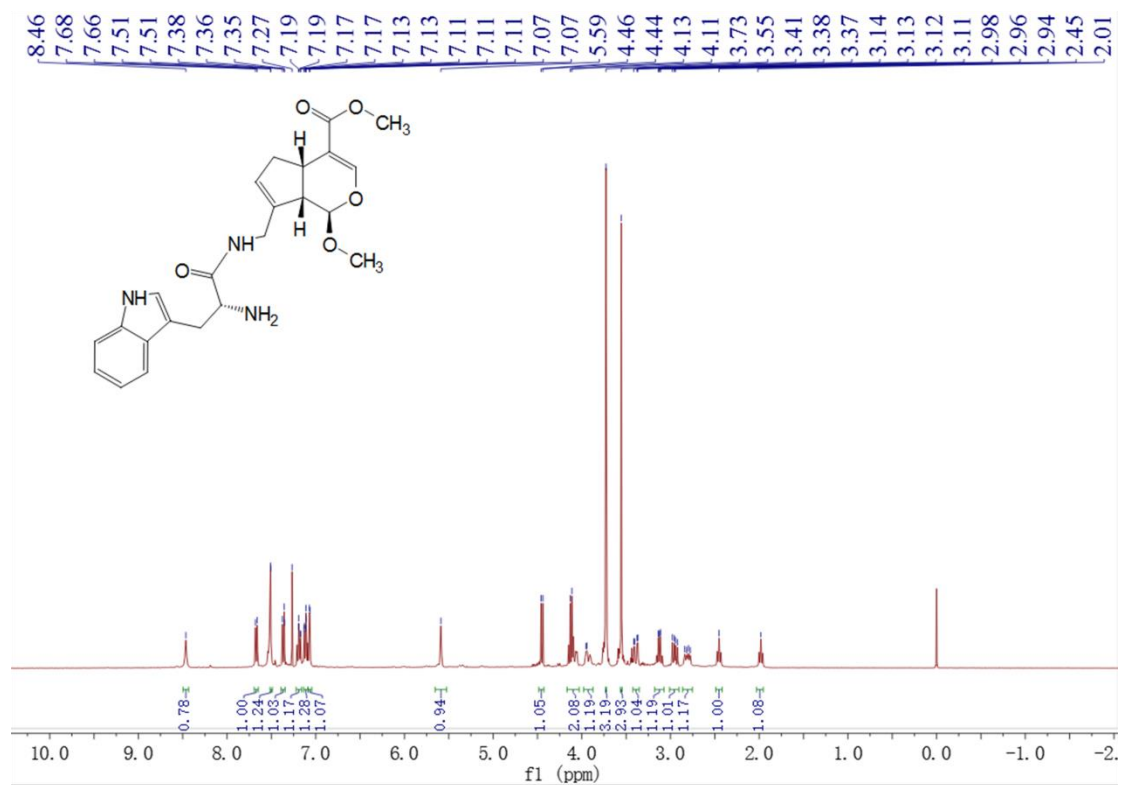



### <sup>13</sup>C-NMR of compound **8**

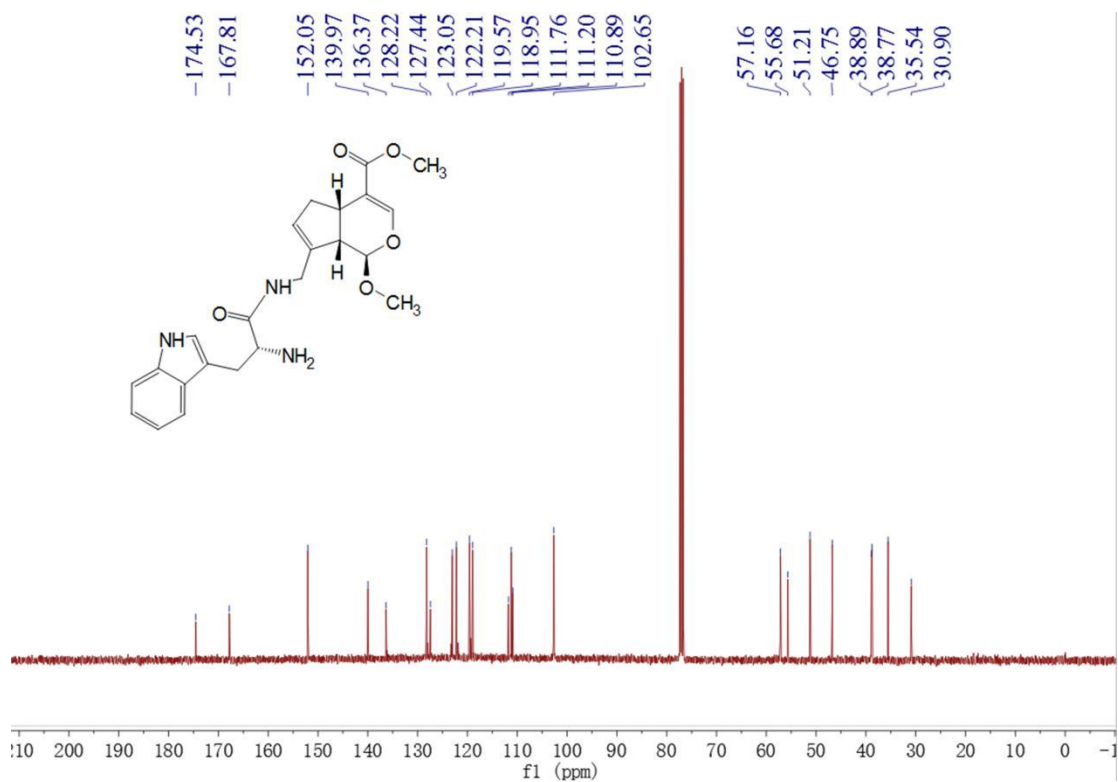

### HR-EI-MS of compound **8**

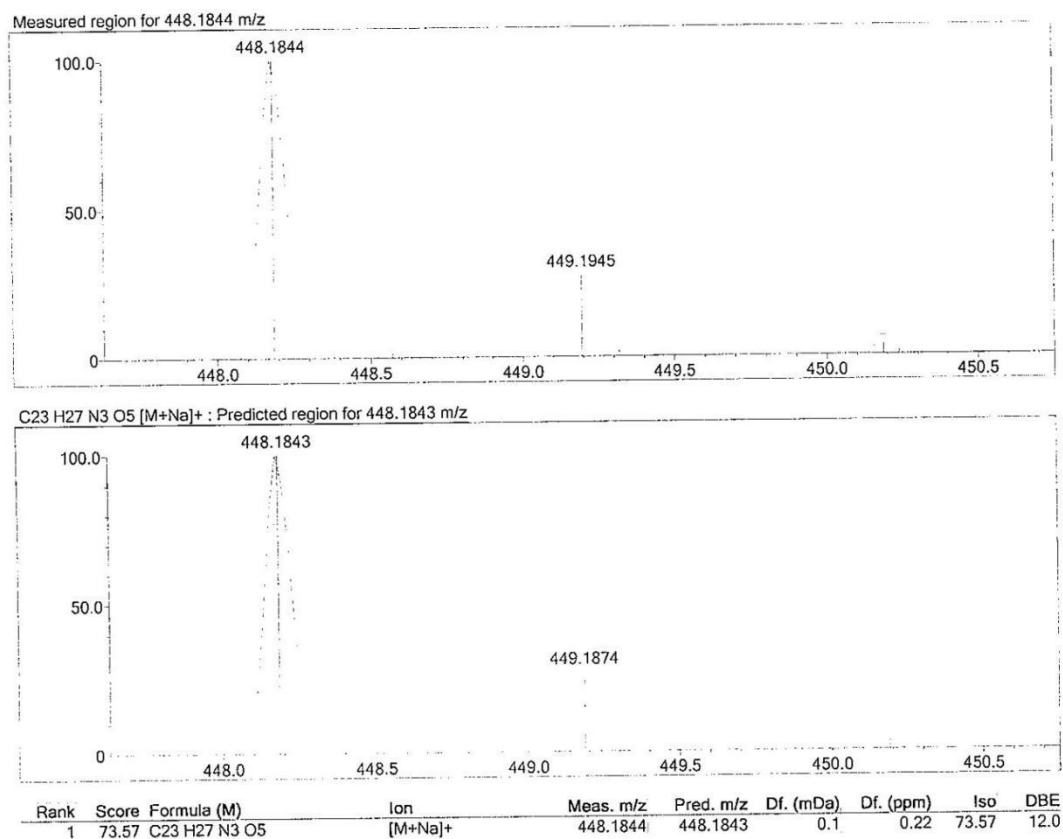



<sup>1</sup>H-NMR of compound **9**

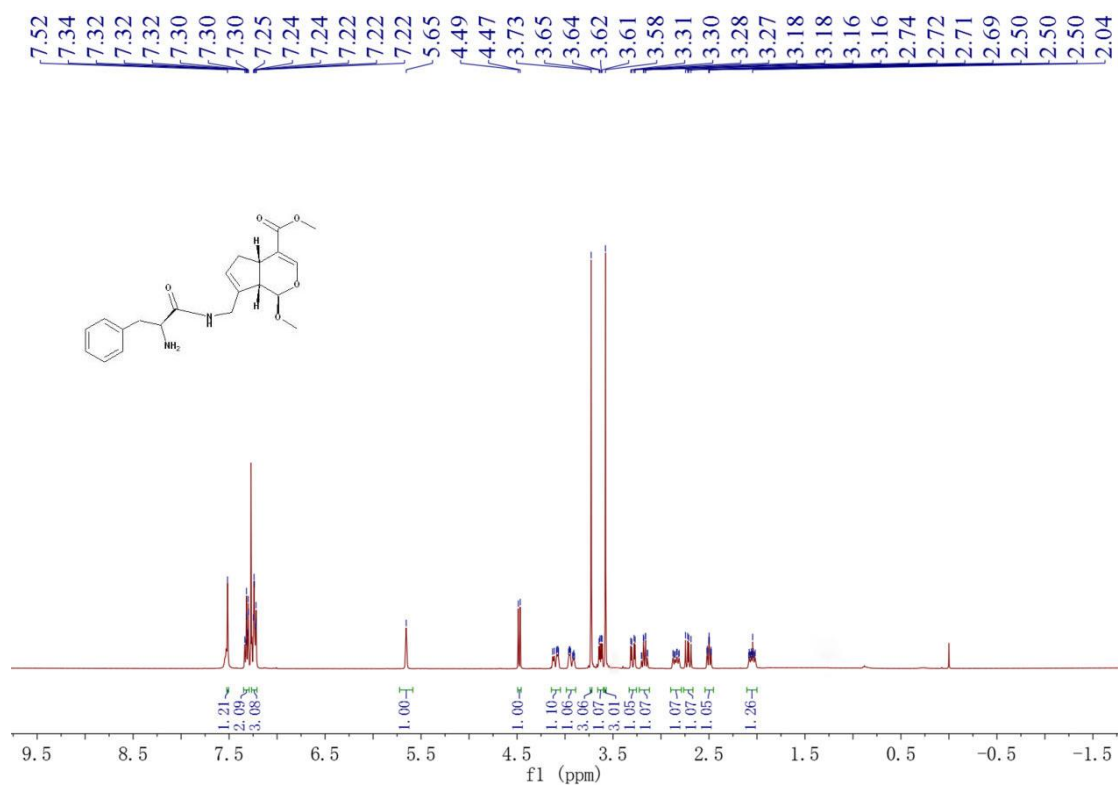

<sup>13</sup>C-NMR of compound **9**

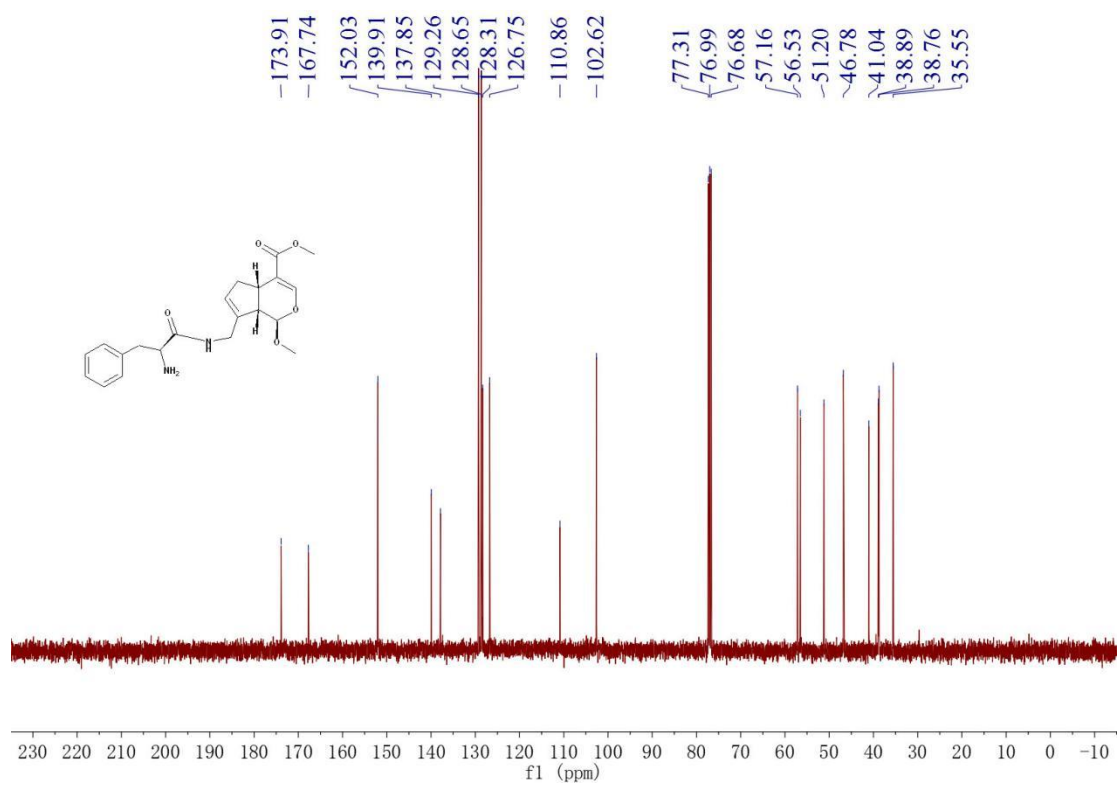

## HR-EI-MS of compound 9

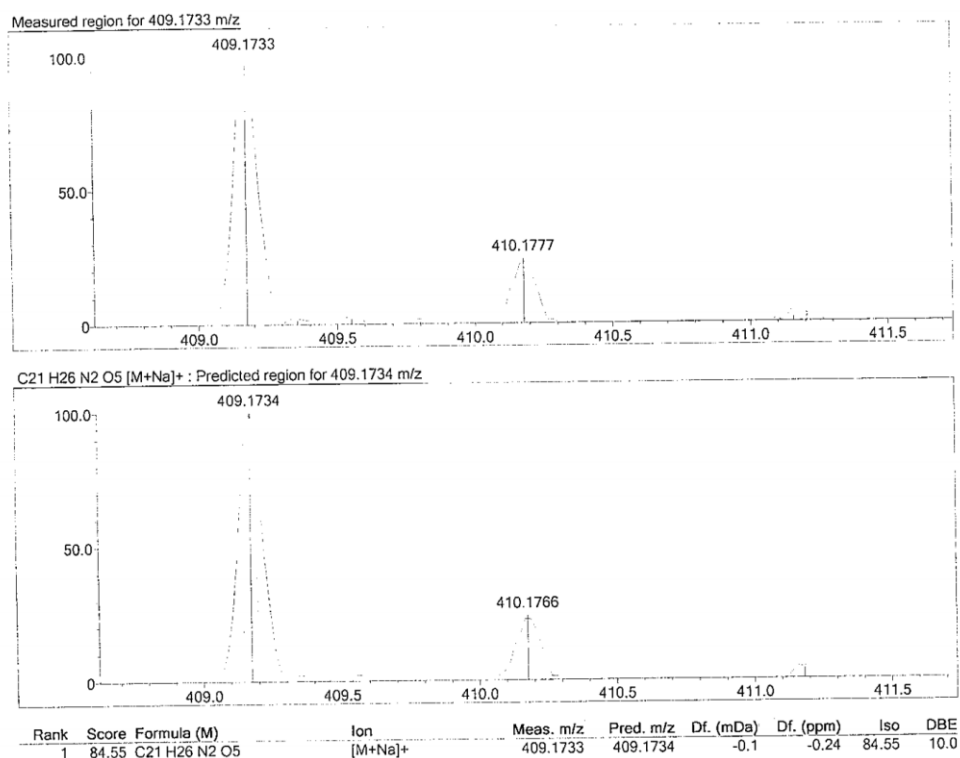

## <sup>1</sup>H-NMR of compound 10

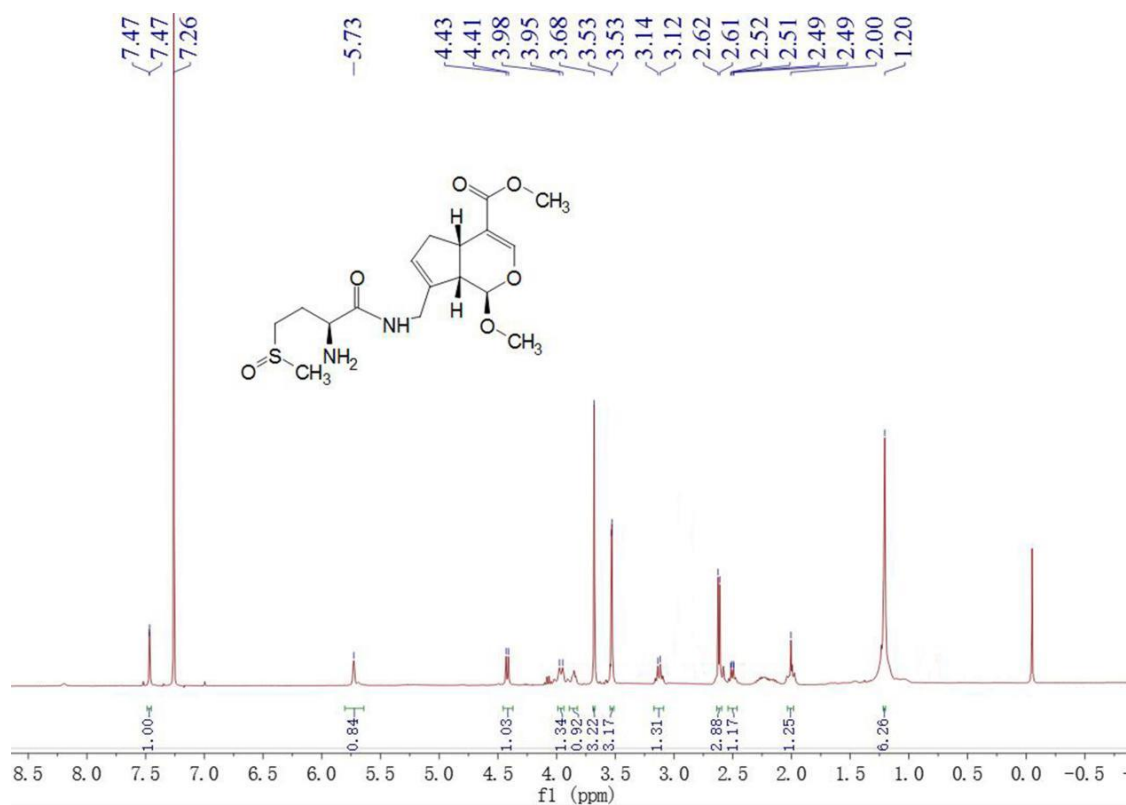

# <sup>13</sup>C-NMR of compound **10**

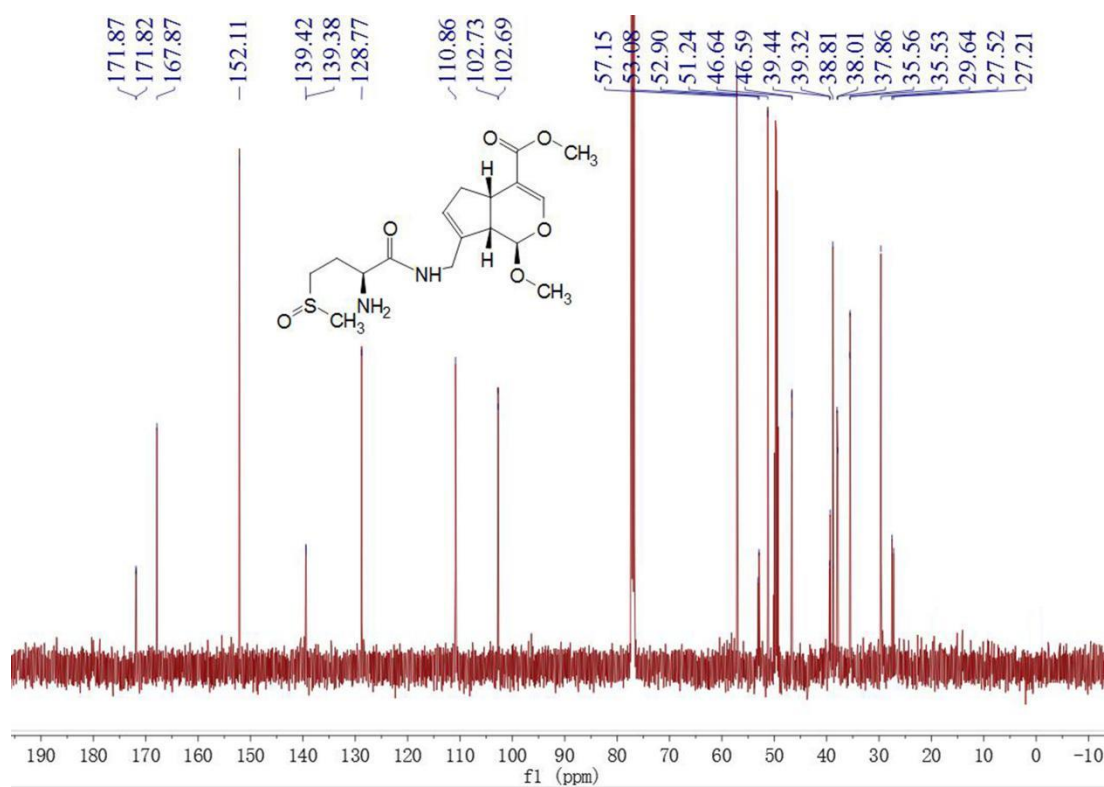

## HR-EI-MS of compound **10**

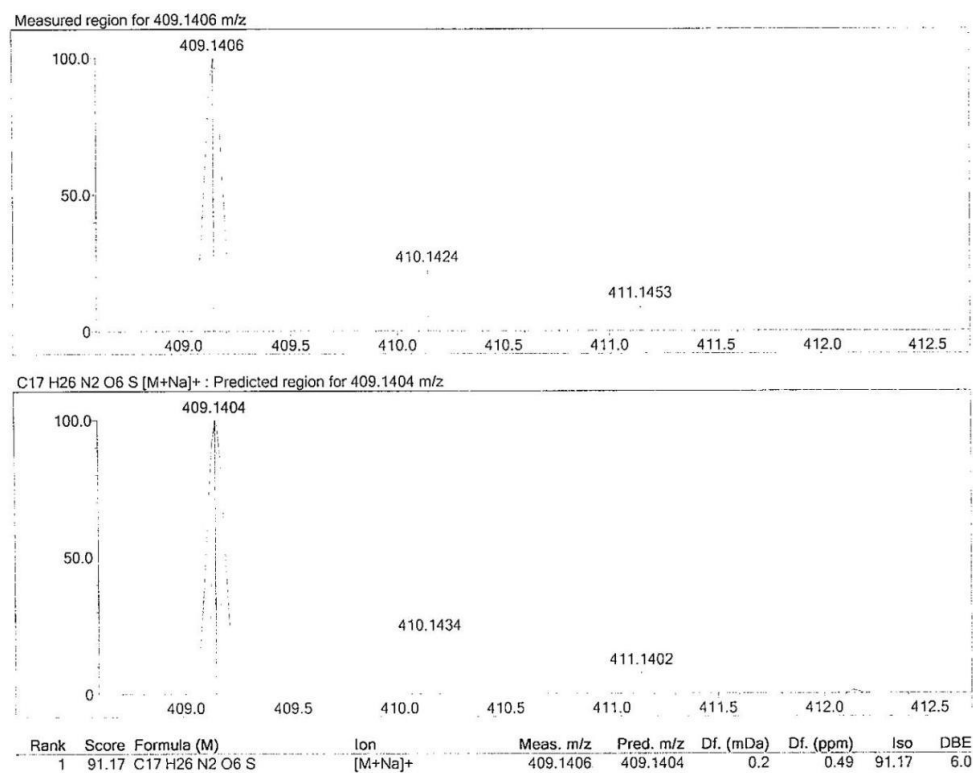

<sup>1</sup>H-NMR of compound **11**

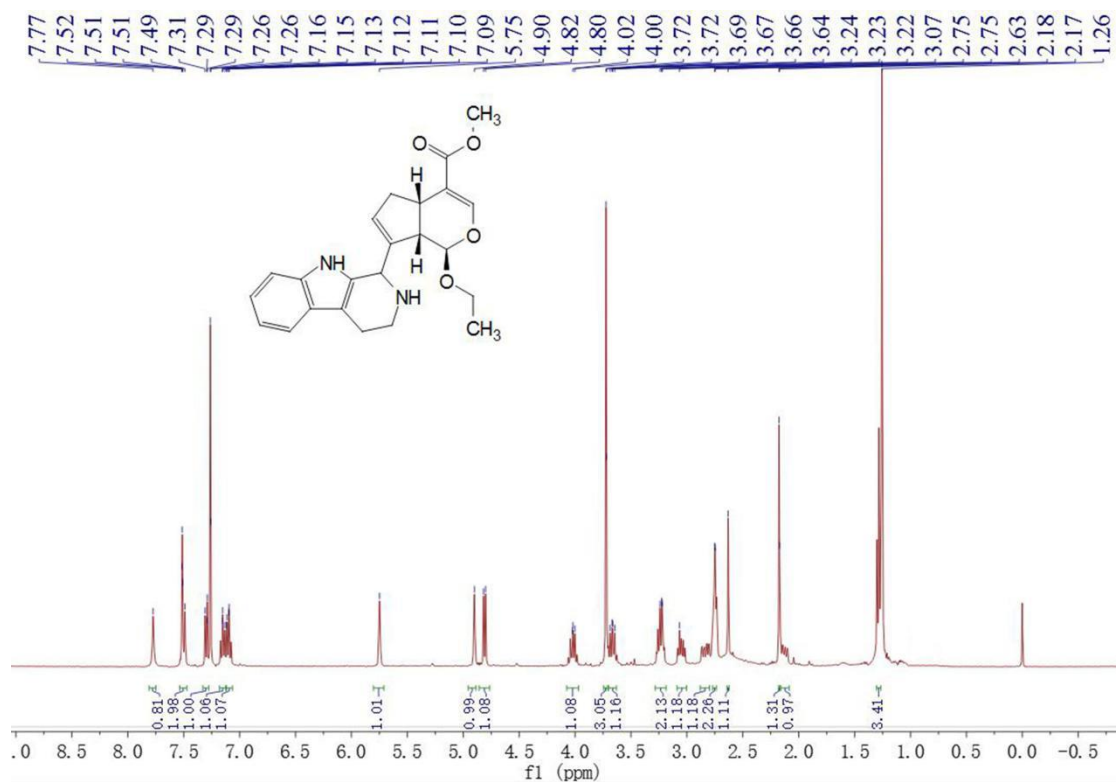

<sup>13</sup>C-NMR of compound **11**

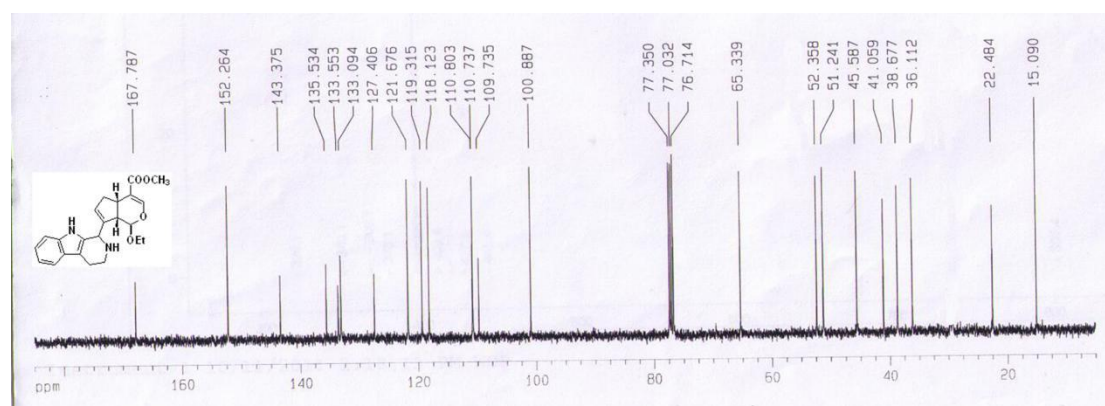

# HR-EI-MS of compound 11

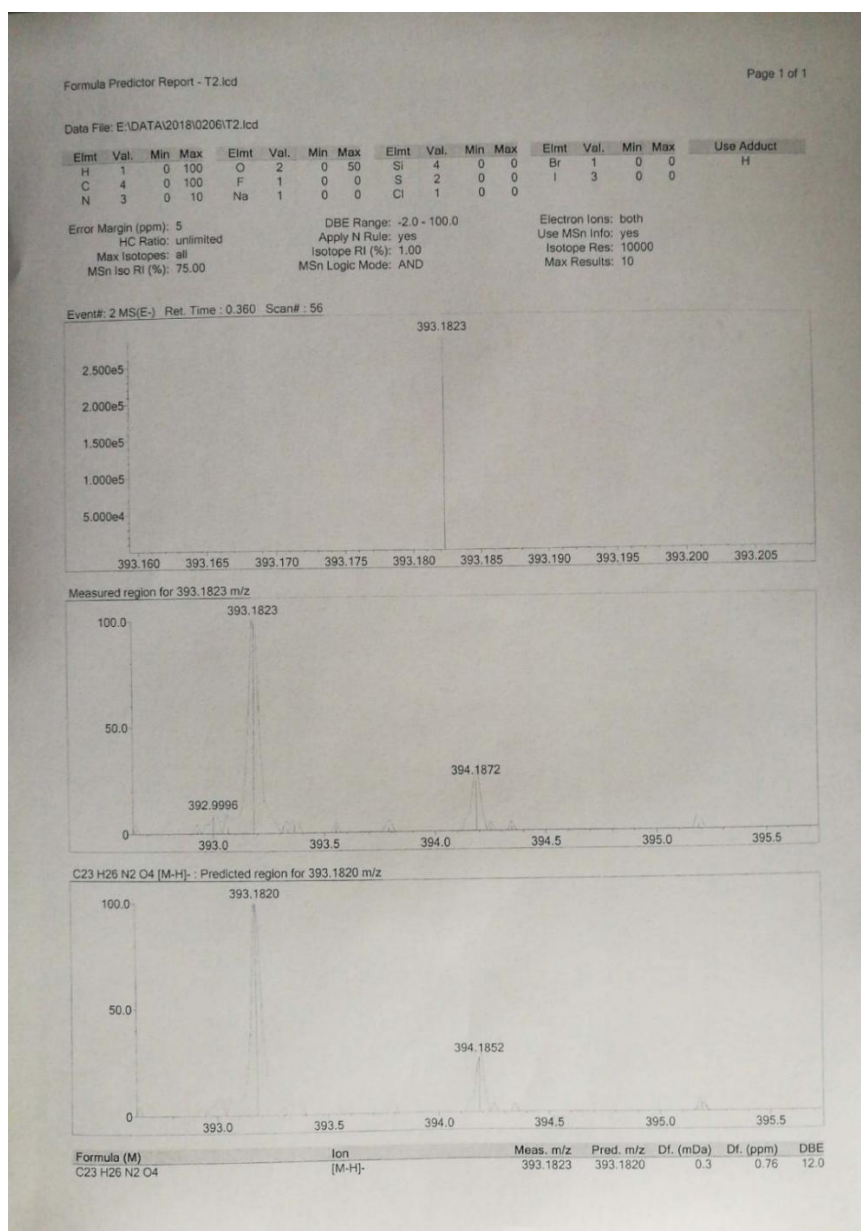

<sup>1</sup>H-NMR of compound **12**

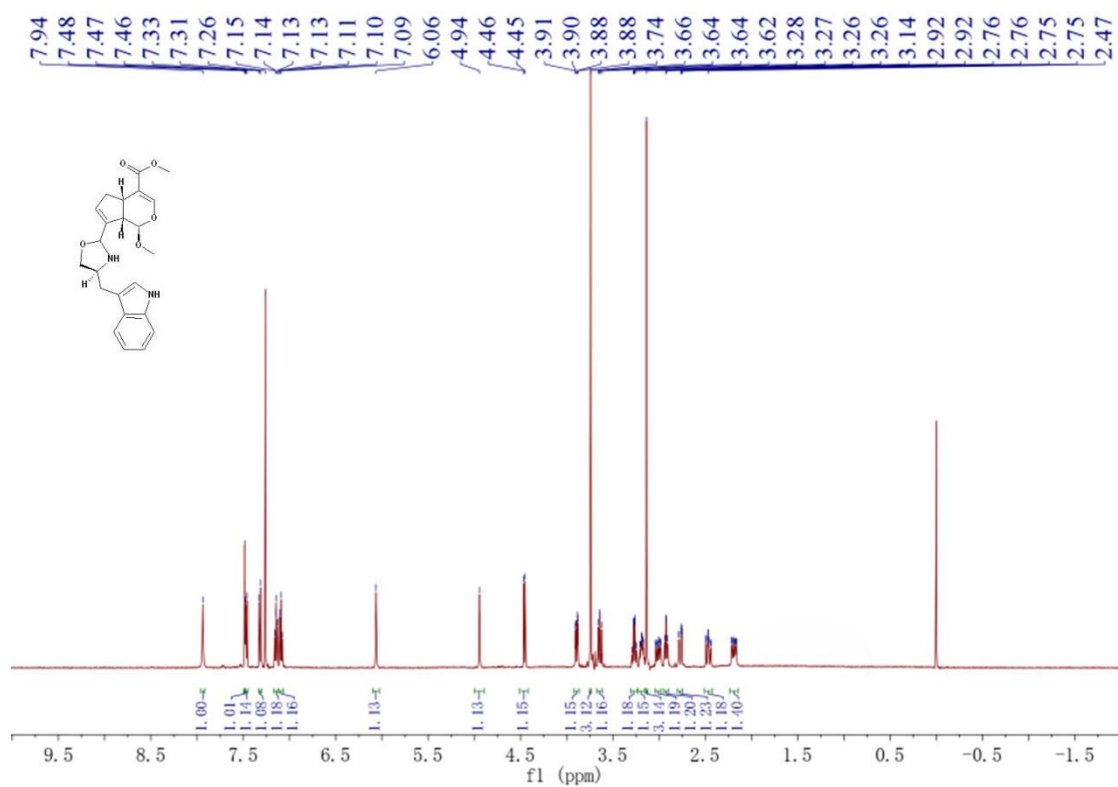

<sup>13</sup>C-NMR of compound **12**

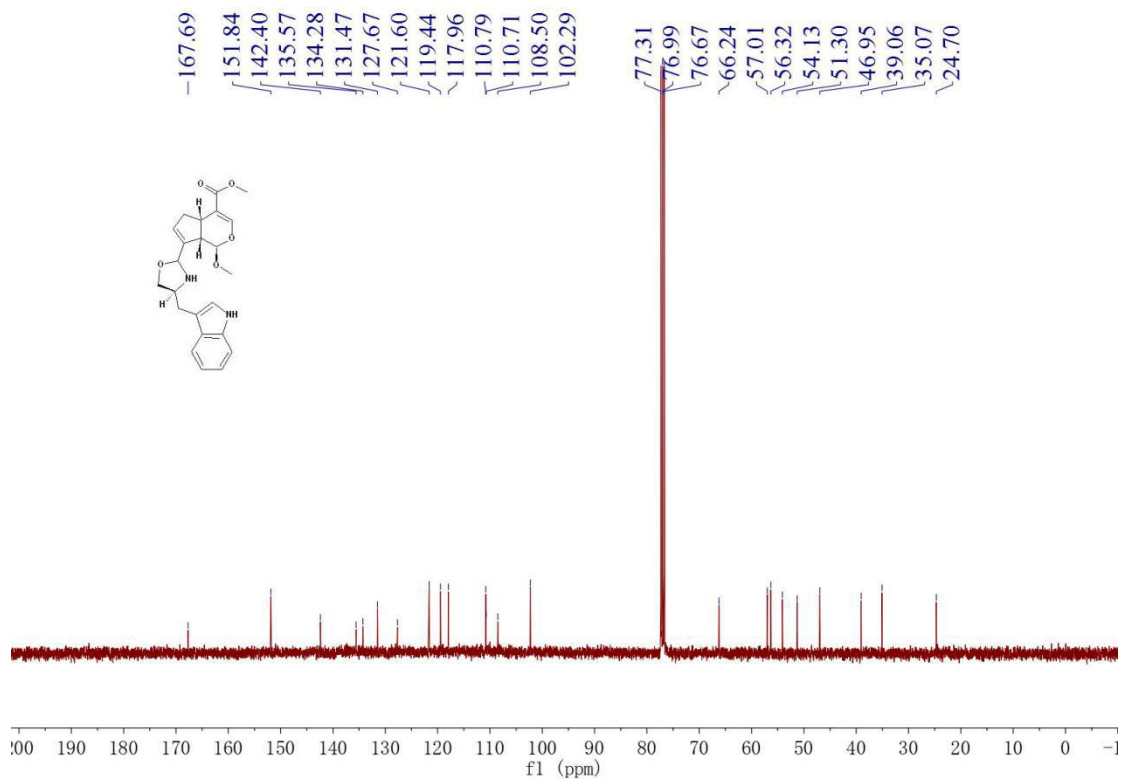

# HR-EI-MS of compound 12

## Elemental Composition Report

Page 1

### Single Mass Analysis

Tolerance = 10.0 PPM / DBE: min = -10.0, max = 120.0

Selected filters: None

Monoisotopic Mass, Odd and Even Electron Ions

22 formula(e) evaluated with 1 results within limits (up to 51 closest results for each mass)

Elements Used:

C: 0-200 H: 0-400 N: 2-2 O: 4-7

PMF7

13:44:57 08-Jul-2016

Voltage EI+

KIB  
M160711EA-05AFAMM 9 (0.826)  
410.1860

Autospec Premier  
P776  
261

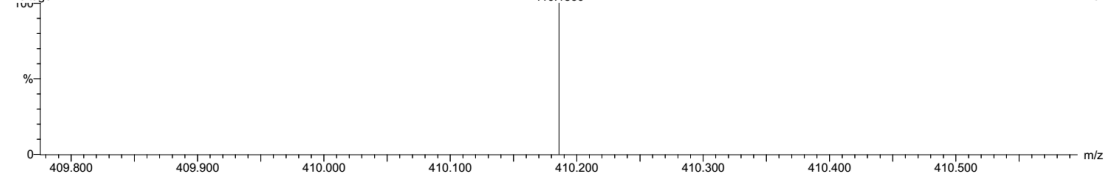

|          |            |      |       |       |           |               |
|----------|------------|------|-------|-------|-----------|---------------|
| Minimum: |            |      |       | -10.0 |           |               |
| Maximum: | 200.0      | 10.0 | 120.0 |       |           |               |
| Mass     | Calc. Mass | mDa  | PPM   | DBE   | i-FIT     | Formula       |
| 410.1860 | 410.1842   | 1.8  | 4.4   | 12.0  | 5546145.5 | C23 H26 N2 O5 |

## <sup>1</sup>H-NMR of compound 13

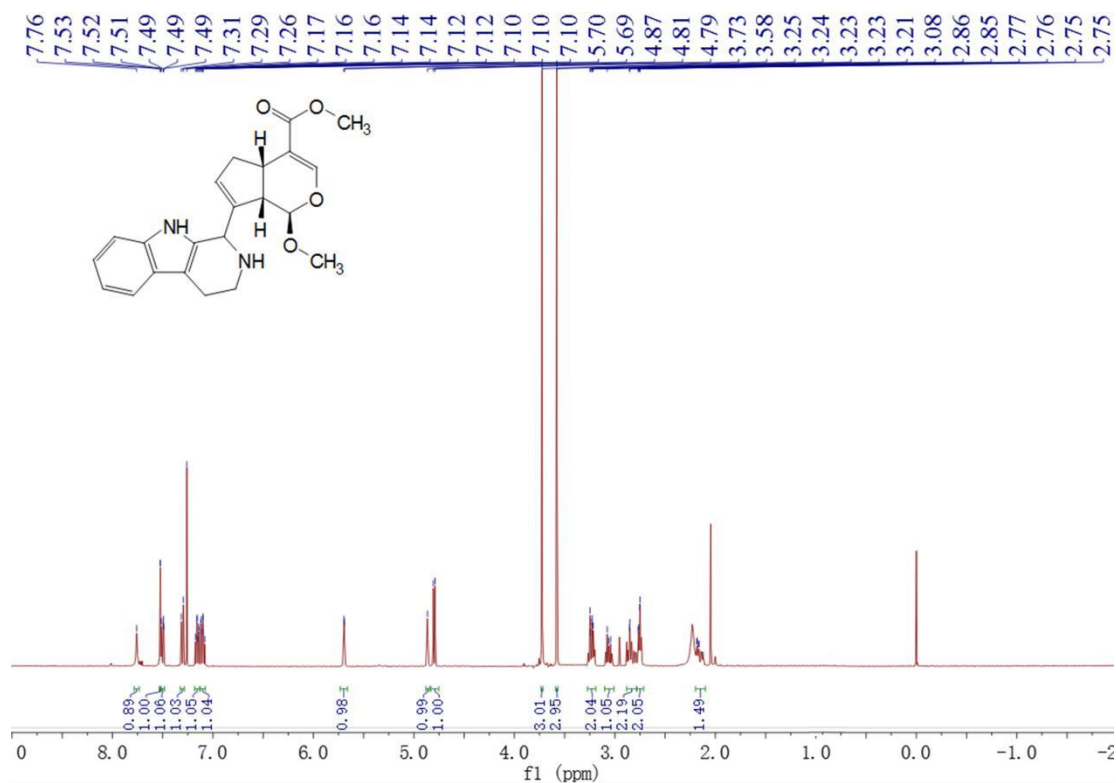



### $^{13}\text{C}$ -NMR of compound **13**

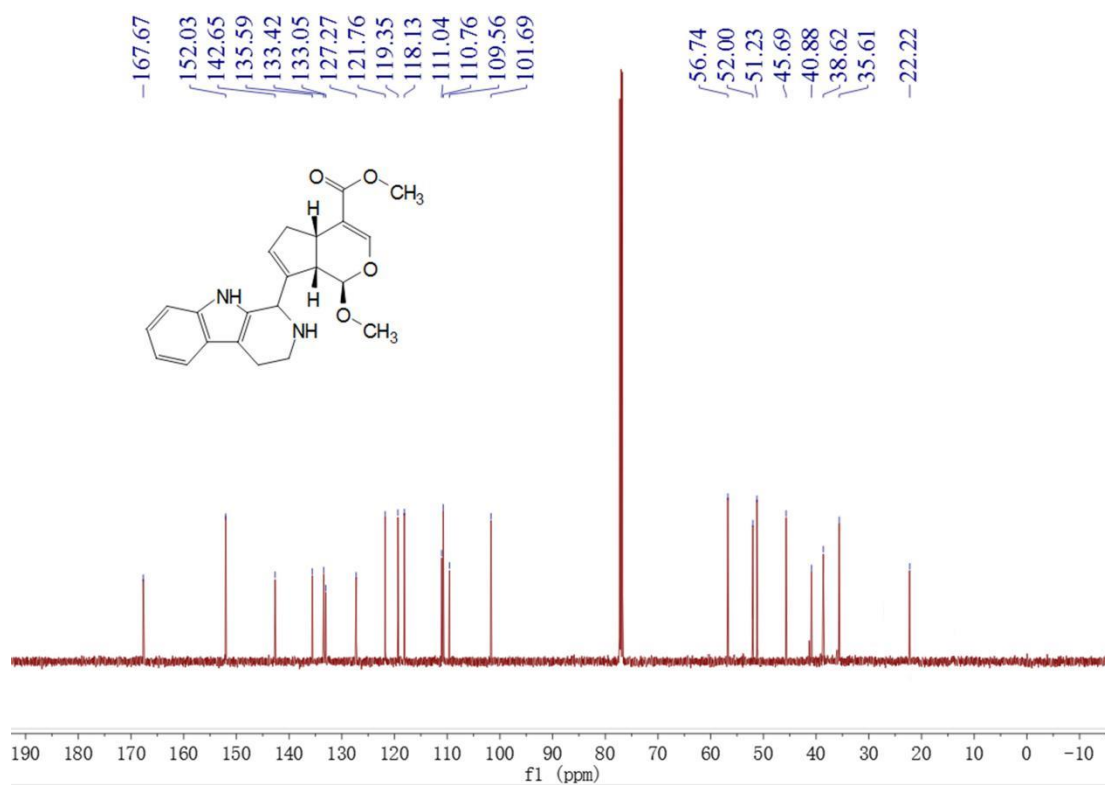

### HR-EI-MS of compound **13**

#### Elemental Composition Report

Page 1

#### Single Mass Analysis

Tolerance = 10.0 PPM / DBE: min = -10.0, max = 120.0

Selected filters: None

Monoisotopic Mass, Odd and Even Electron Ions  
22 formula(e) evaluated with 1 results within limits (up to 51 closest results for each mass)

Elements Used:  
C: 0-200 H: 0-400 N: 2-2 O: 3-6

PMT381  
14:08:31 08-Jul-2016  
Voltage EI+

KIB  
M160711EA-10AFAMM 19 (1.745)  
380.1737

Autospec Premier  
P776  
435

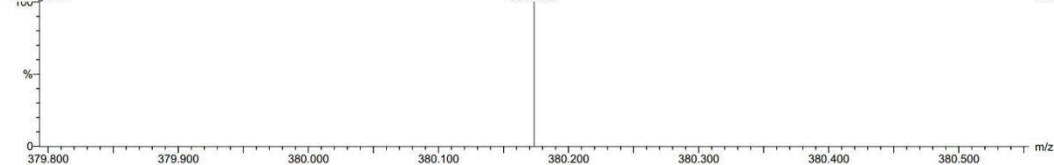

Minimum: 200.0 10.0 -10.0  
Maximum: 380.1736 0.1 0.3 12.0

| Mass     | Calc. Mass | mDa | PPM | DBE  | i-FIT     | Formula       |
|----------|------------|-----|-----|------|-----------|---------------|
| 380.1737 | 380.1736   | 0.1 | 0.3 | 12.0 | 5546231.5 | C22 H24 N2 O4 |



<sup>1</sup>H-NMR of compound **14**

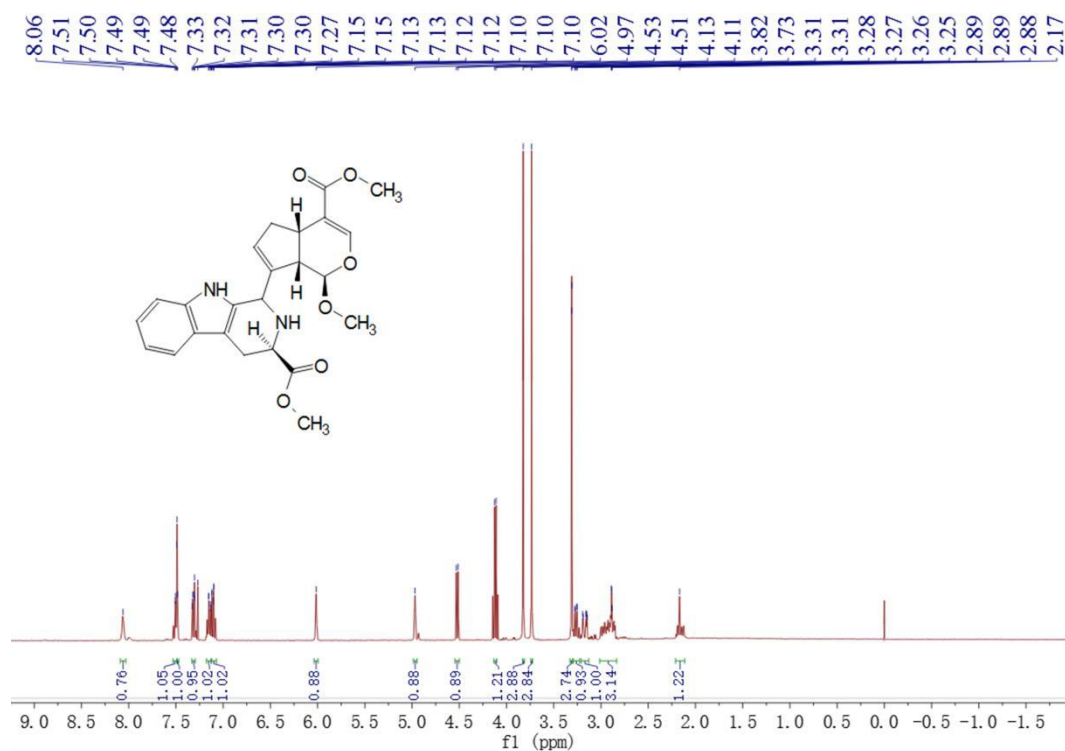

<sup>13</sup>C-NMR of compound **14**

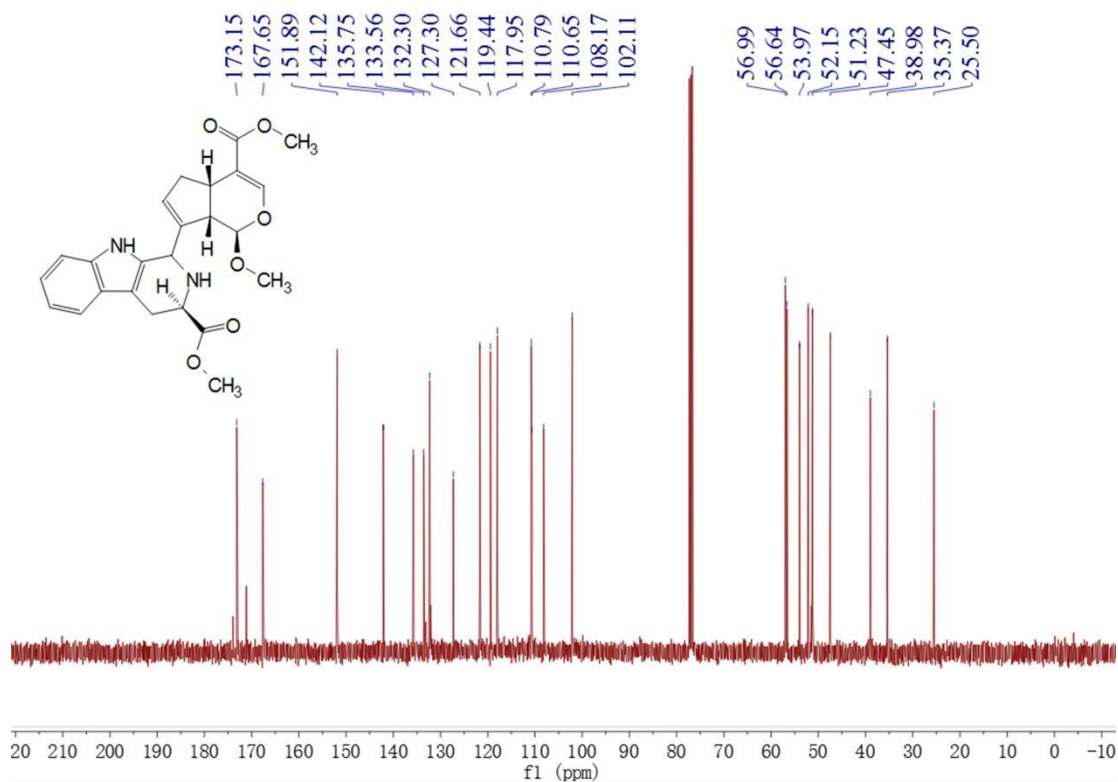

HR-EI-MS of compound **14**

## Elemental Composition Report

Page 1

## Single Mass Analysis

Tolerance = 10.0 PPM / DBE: min = -10.0, max = 120.0

Selected filters: None

**Monoisotopic Mass, Odd and Even Electron Ions**

23 formula(e) evaluated with 1 results within limits (up to 51 closest results for each mass)

Elements Used:

C: 0-200 H: 0-400 N: 2-2 O: 4-7

C. U-2  
PMF8

PMF8  
13:40:43 08-Jul-2016

Voltage El+  
1V

KIB  
M160711EA-04AFAMM 8 (0.734)  
438.1801

Autospec Premier  
P776  
124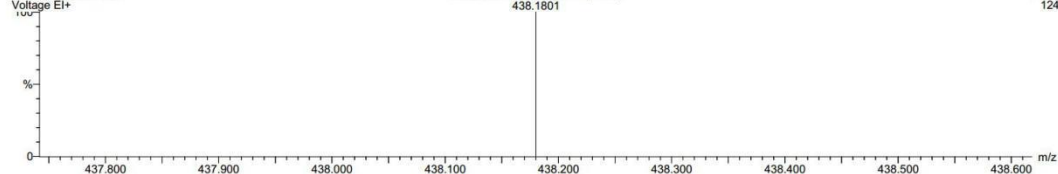

```
Minimum:                                -10.0
Maximum:      200.0      10.0      120.0
```

| Mass     | Calc. Mass | mDa | PPM | DBE  | i-FIT     | Formula       |
|----------|------------|-----|-----|------|-----------|---------------|
| 438.1801 | 438.1791   | 1.0 | 2.3 | 13.0 | 5546078.5 | C24 H26 N2 O6 |

<sup>1</sup>H-NMR of compound **15**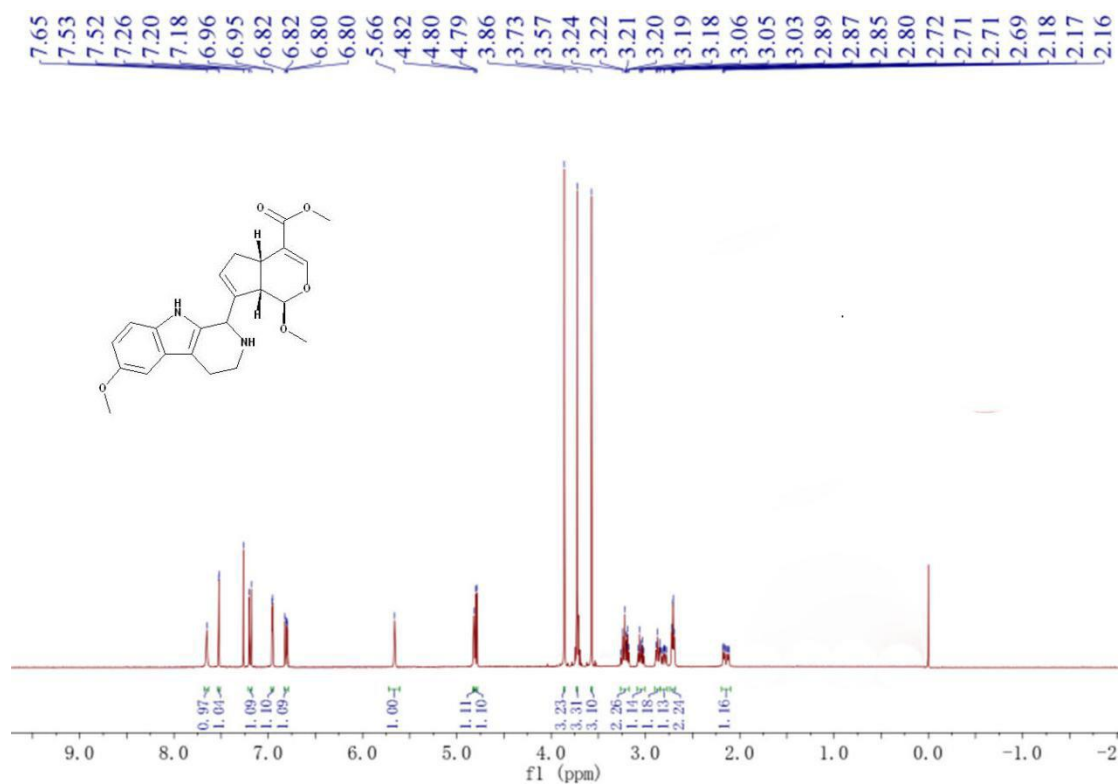

# <sup>13</sup>C-NMR of compound **15**

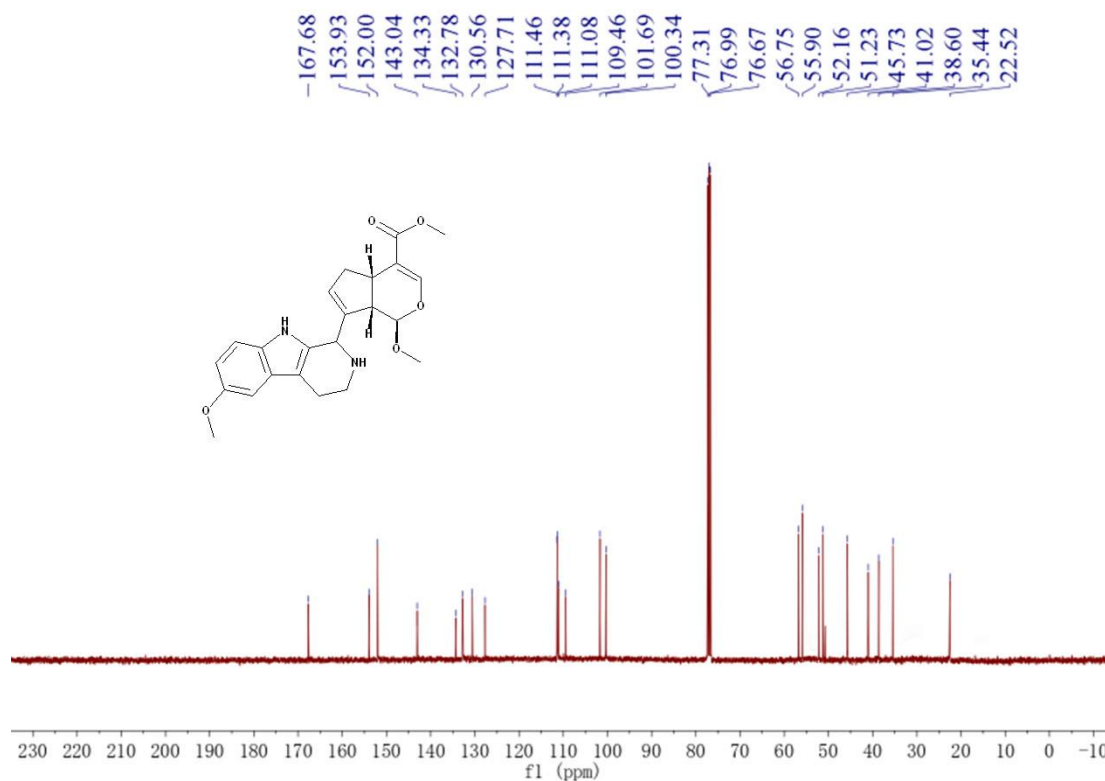

## HR-EI-MS of compound **15**

### Elemental Composition Report

Page 1

#### Single Mass Analysis

Tolerance = 10.0 PPM / DBE: min = -10.0, max = 120.0  
Selected filters: None

Monoisotopic Mass, Odd and Even Electron Ions  
23 formula(e) evaluated with 1 results within limits (up to 51 closest results for each mass)

Elements Used:  
C: 0-200 H: 0-400 N: 2-2 O: 3-6

PMF2  
14:03:50 08-Jul-2016  
Voltage EI+

KIB  
M160711EA-09AFAMM 10 (0.918)  
410.1834

Autospec Premier  
P776  
14.6

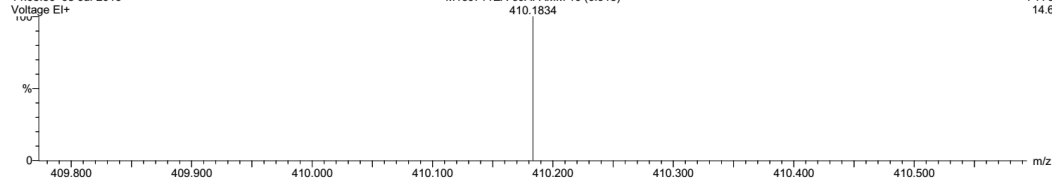

Minimum: 200.0 10.0 -10.0  
Maximum: 410.1834 14.6 120.0

| Mass     | Calc. Mass | mDa  | PPM  | DBE  | i-FIT     | Formula       |
|----------|------------|------|------|------|-----------|---------------|
| 410.1834 | 410.1842   | -0.8 | -2.0 | 12.0 | 5546027.0 | C23 H26 N2 O5 |

<sup>1</sup>H-NMR of compound **16**

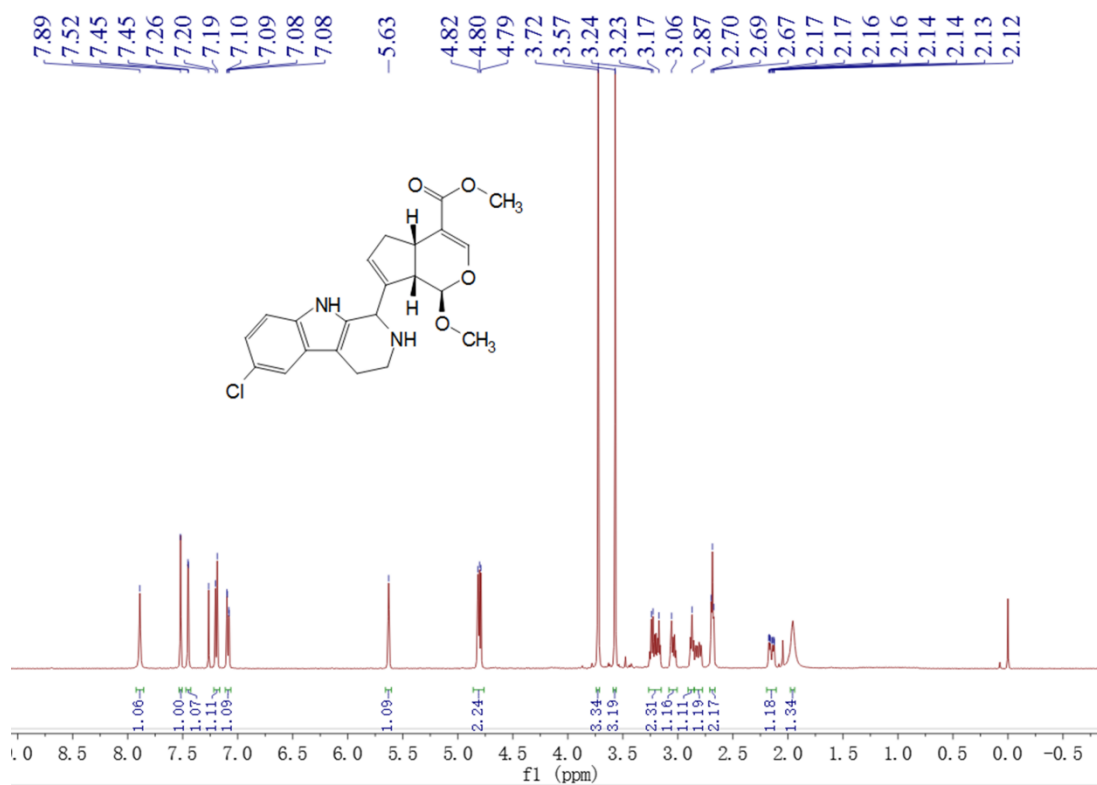

<sup>13</sup>C-NMR of compound **16**

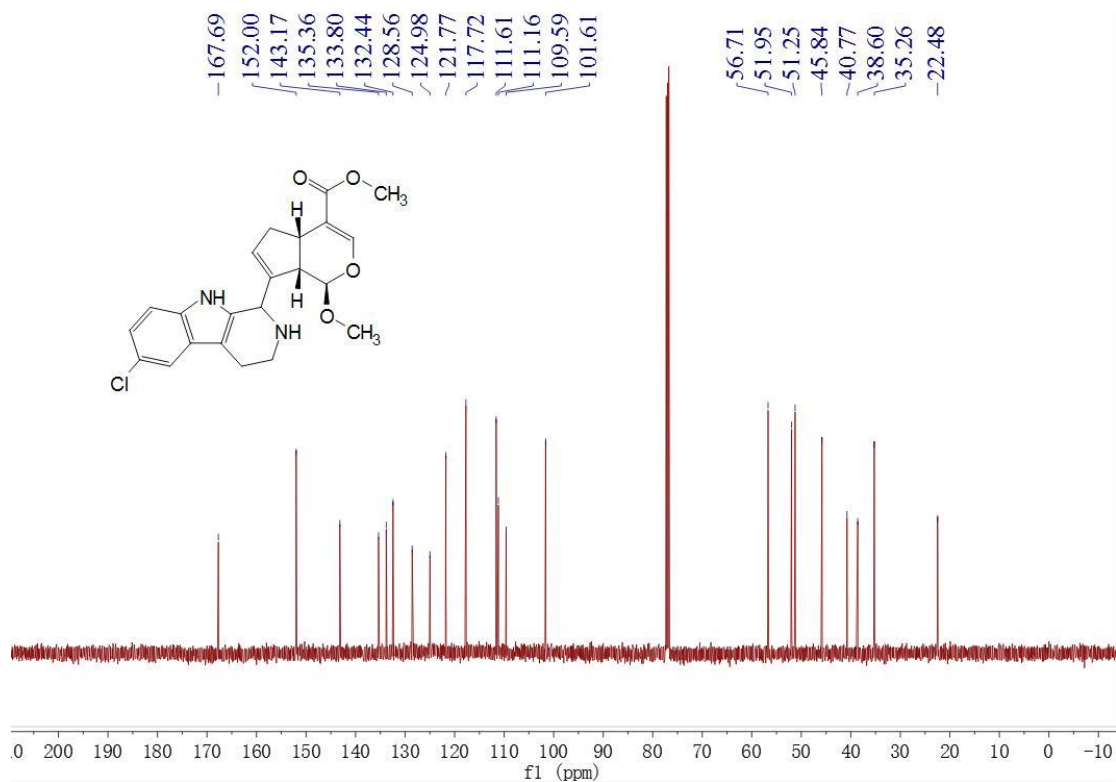

## HR-EI-MS of compound **16**

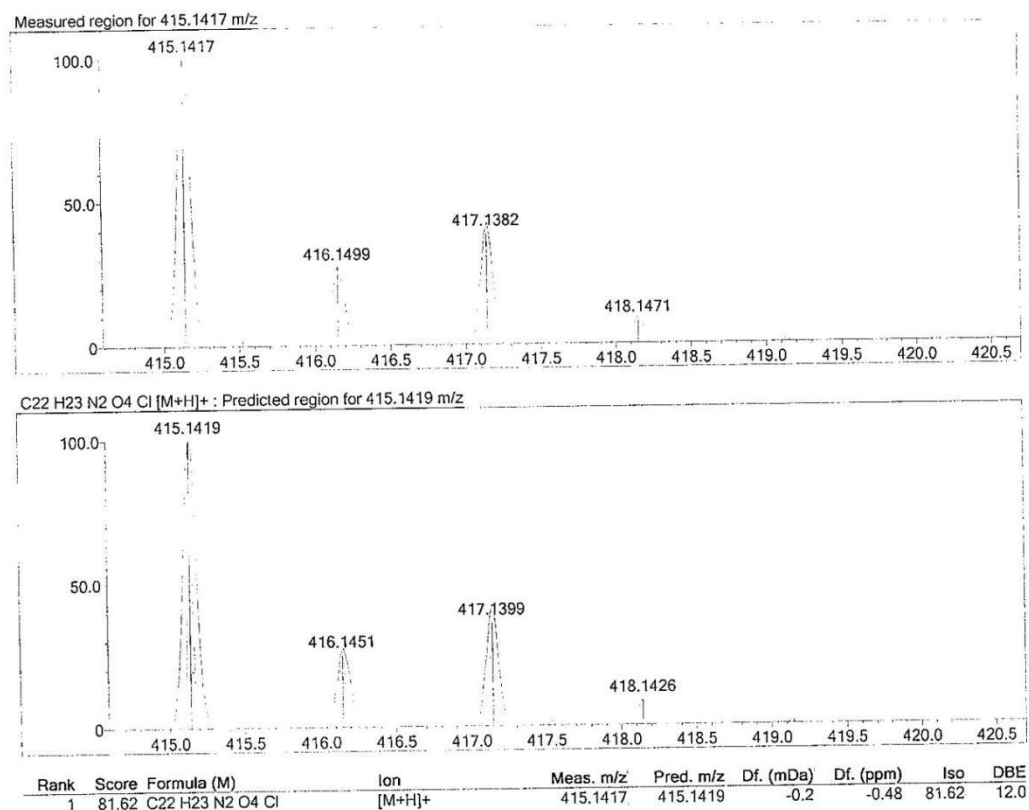

## <sup>1</sup>H-NMR of compound **17**

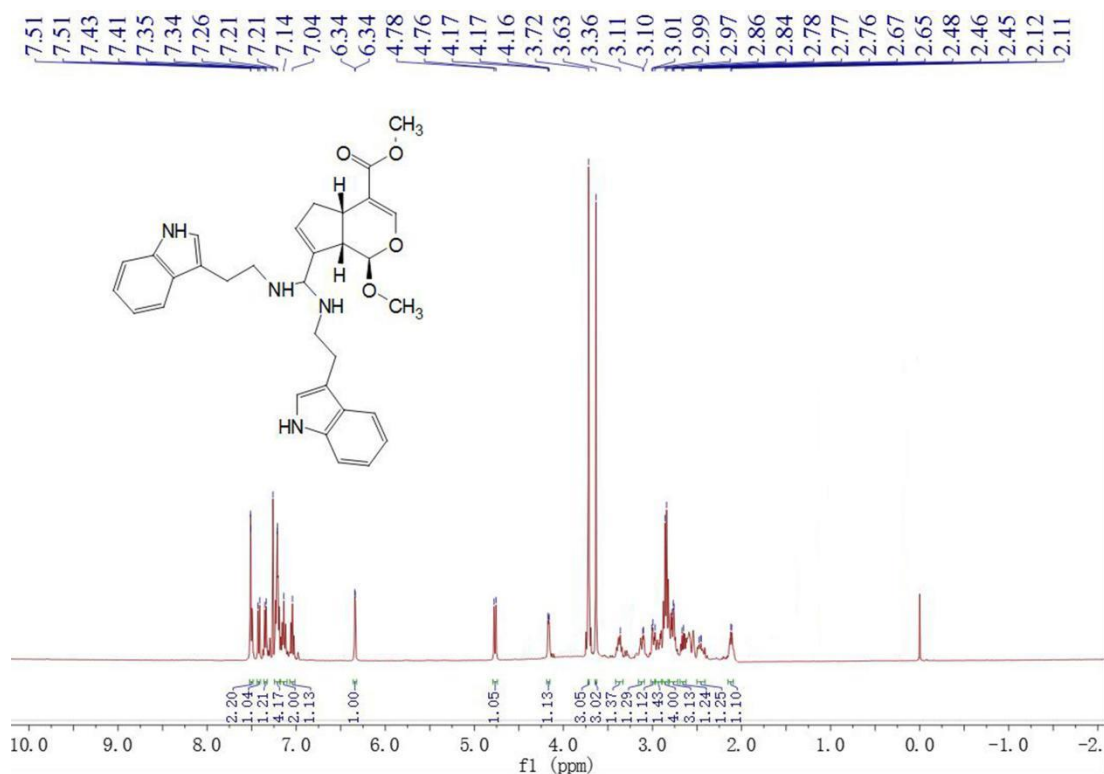

# <sup>13</sup>C-NMR of compound **17**

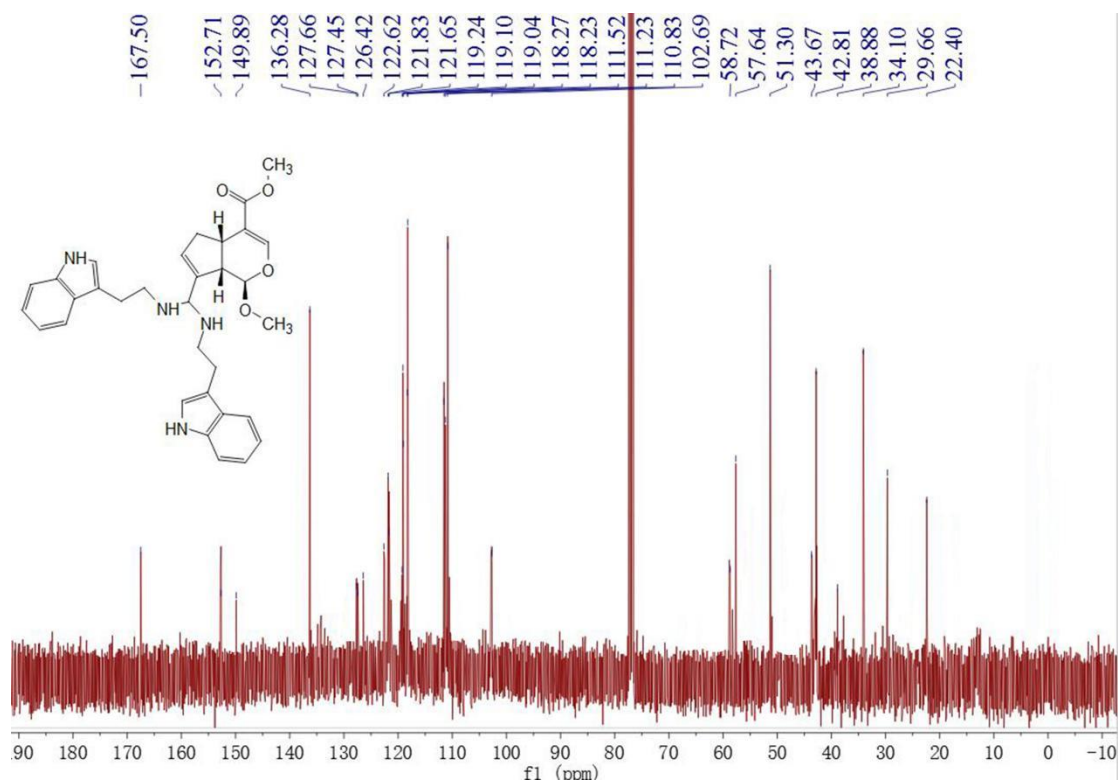

# HR-EI-MS of compound **17**

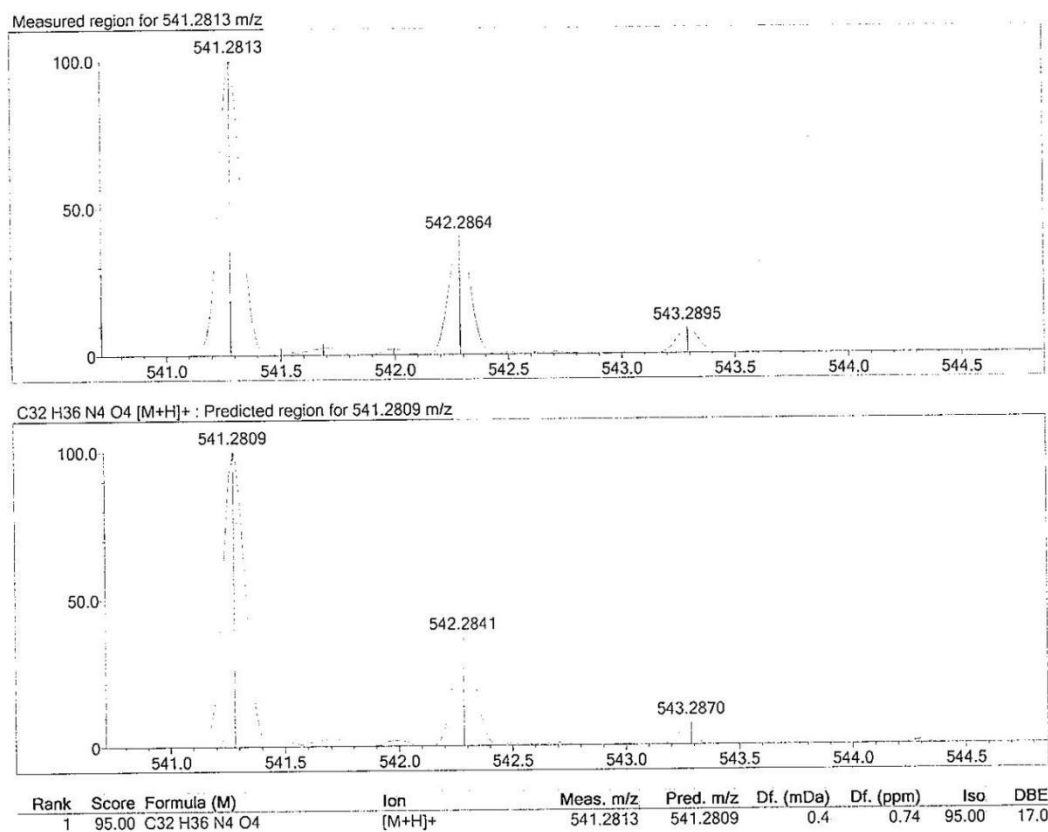

<sup>1</sup>H-NMR of compound **18**

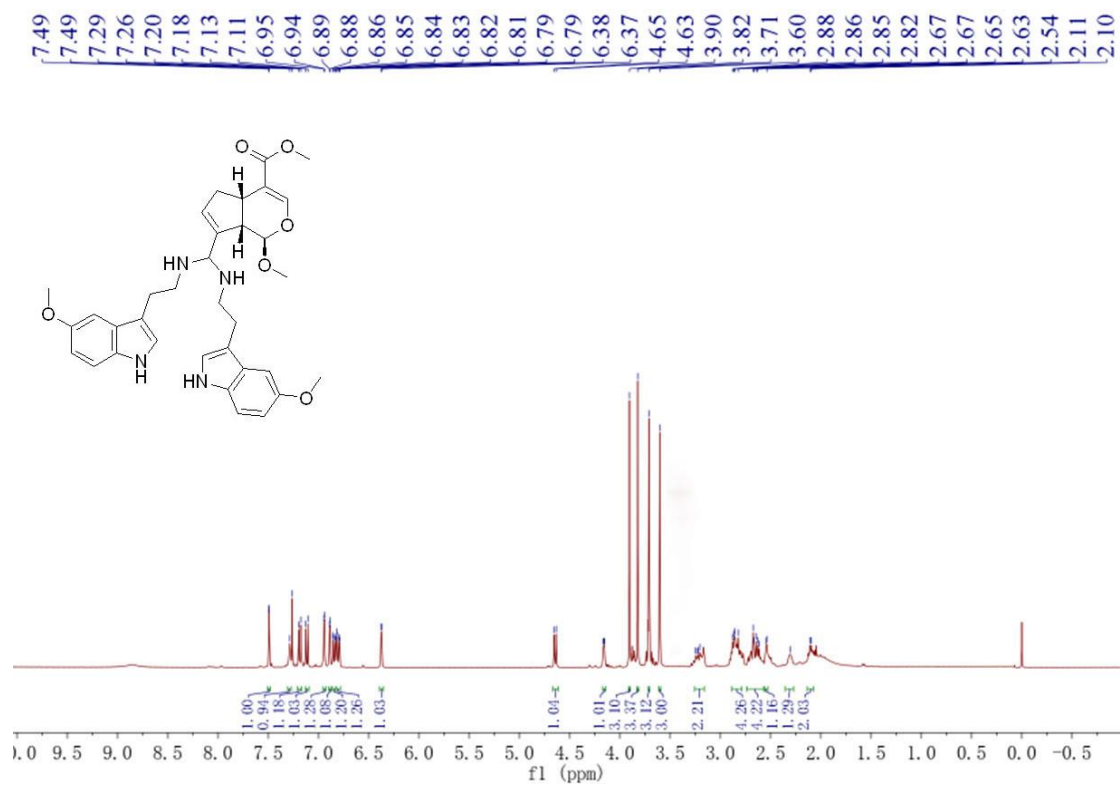

<sup>13</sup>C-NMR of compound **18**

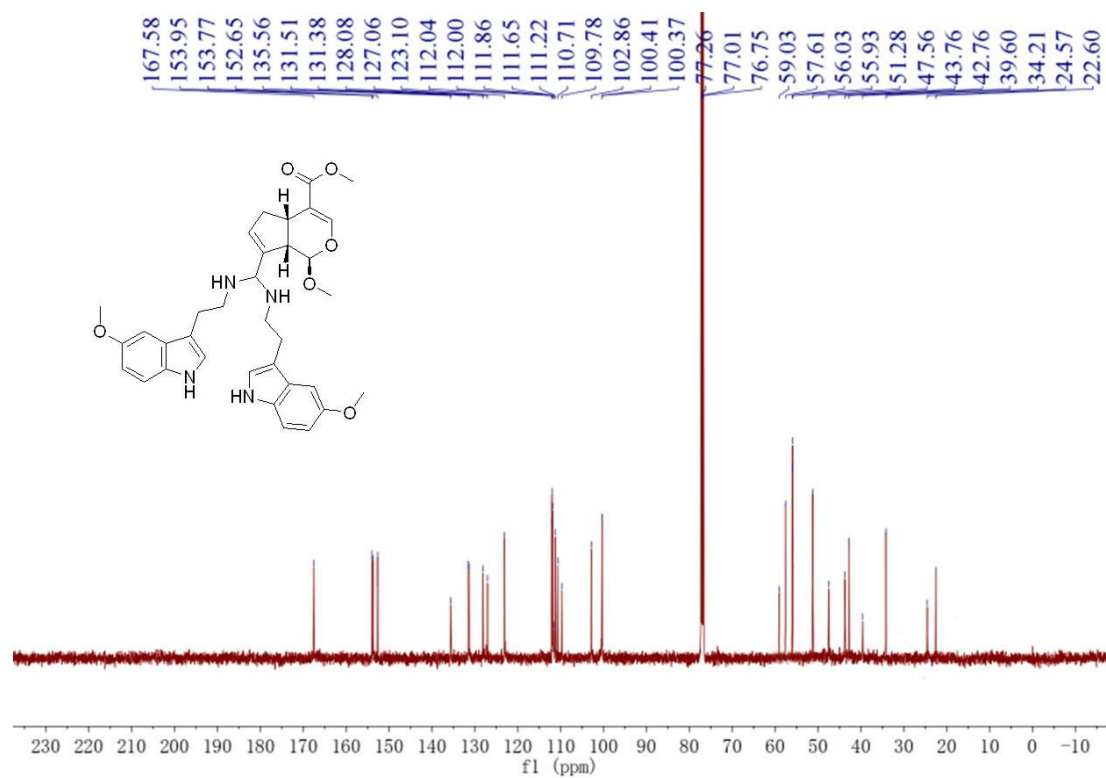



## HR-EI-MS of compound **18**

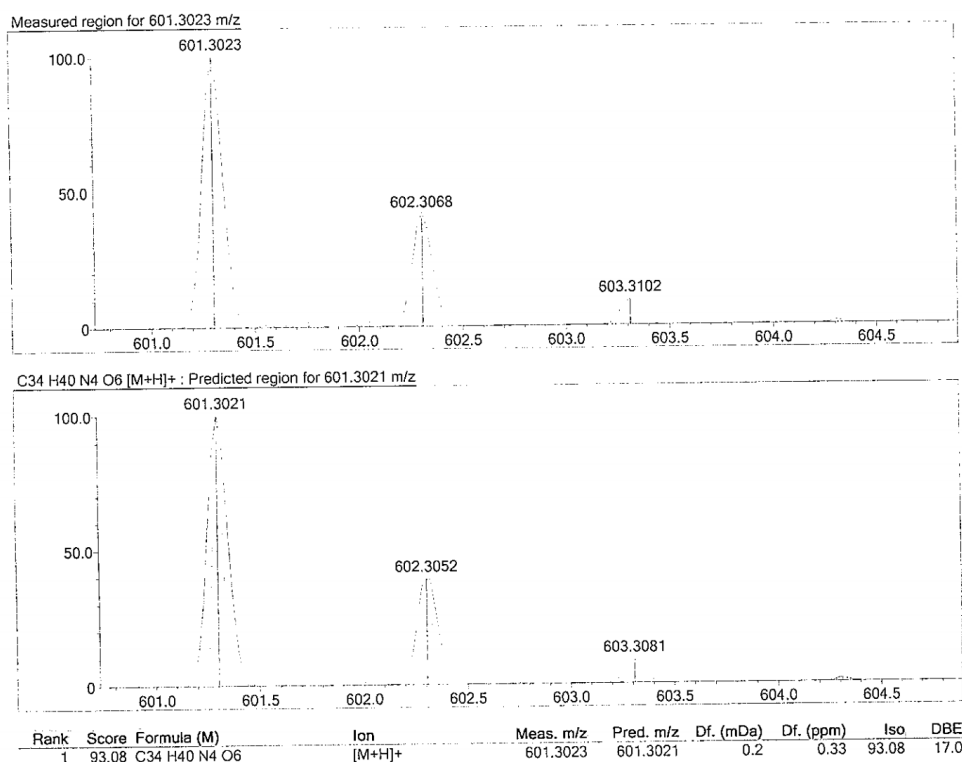

## <sup>1</sup>H-NMR of compound **19**

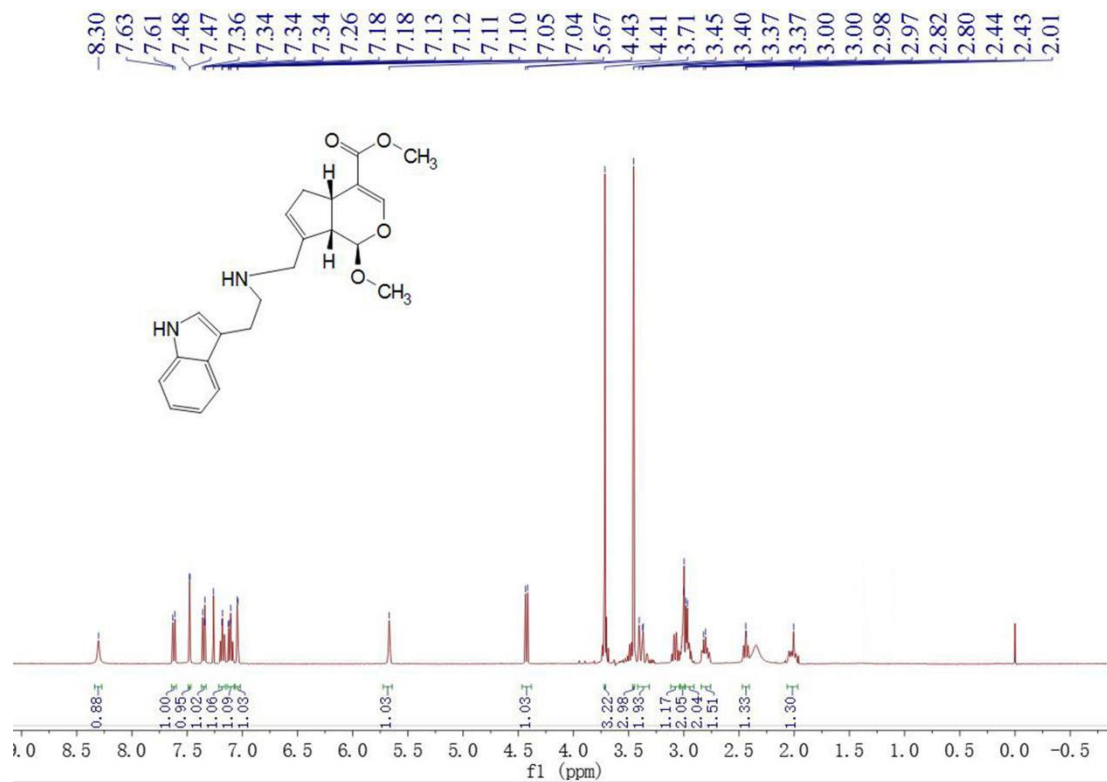



# <sup>13</sup>C-NMR of compound **19**

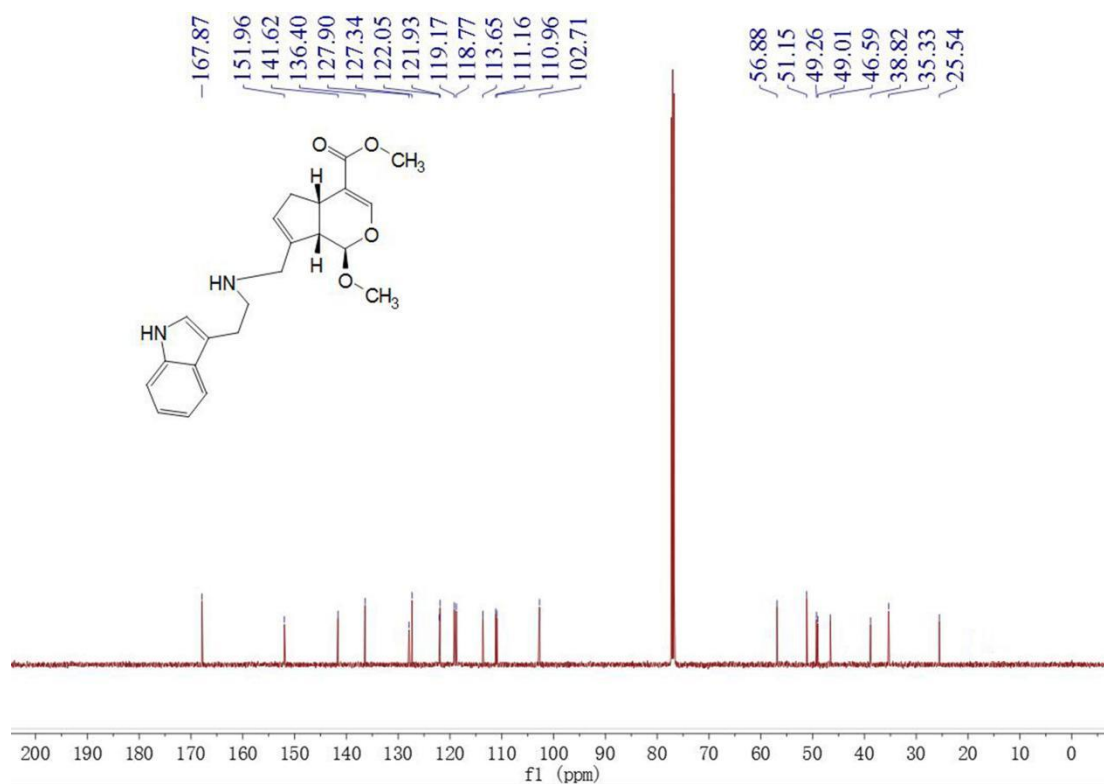

## HR-EI-MS of compound **19**

### Elemental Composition Report

Page 1

#### Single Mass Analysis

Tolerance = 10.0 PPM / DBE: min = -10.0, max = 120.0  
Selected filters: None

Monoisotopic Mass, Odd and Even Electron Ions  
17 formula(e) evaluated with 1 results within limits (up to 51 closest results for each mass)

Elements Used:

C: 0-200 H: 0-400 N: 2-2 O: 3-5

PMF4  
13:58:58 08-Jul-2016

Voltage EI+

KIB  
M160711EA-06AFAMM 14 (1.285)  
382.1892

Autospec Premier  
P776  
24

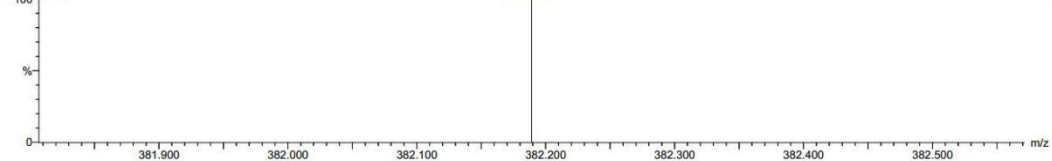

|          |            |      |       |      |           |               |
|----------|------------|------|-------|------|-----------|---------------|
| Minimum: | 200.0      | 10.0 | -10.0 |      |           |               |
| Maximum: |            |      | 120.0 |      |           |               |
| Mass     | Calc. Mass | mDa  | PPM   | DBE  | i-FIT     | Formula       |
| 382.1892 | 382.1893   | -0.1 | -0.3  | 11.0 | 5546030.5 | C22 H26 N2 O4 |

<sup>1</sup>H-NMR of compound **20**

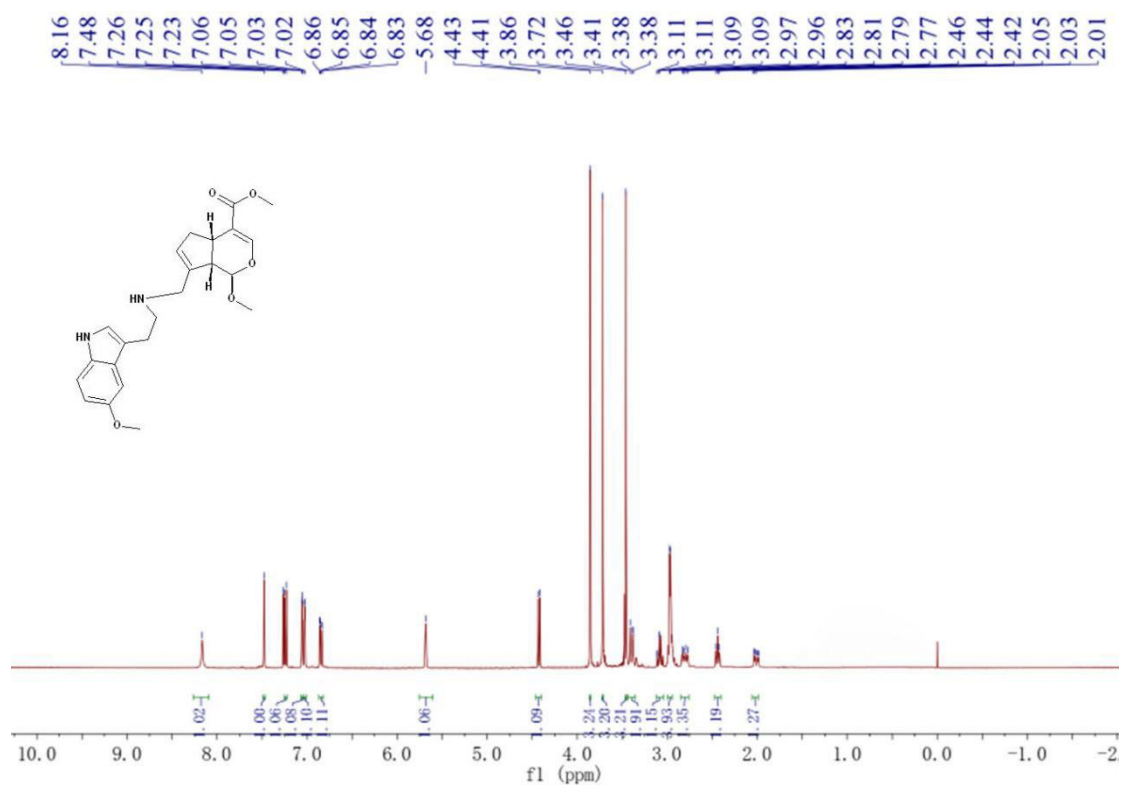

<sup>13</sup>C-NMR of compound **20**

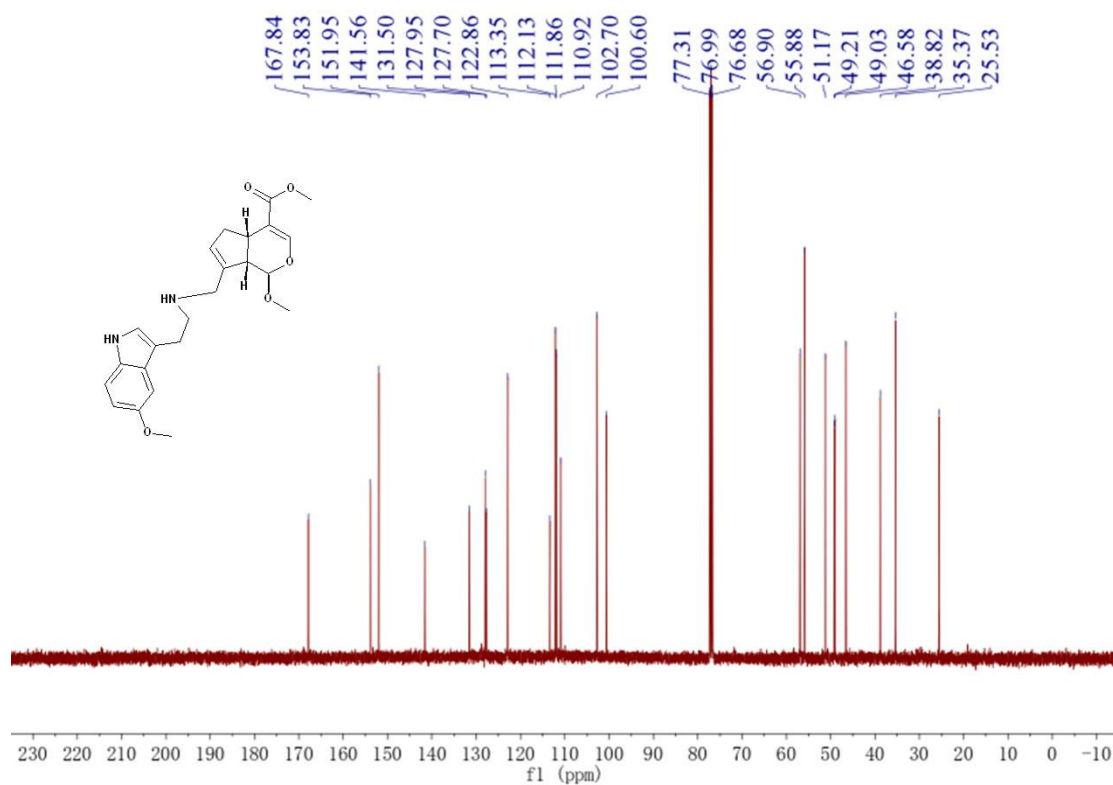

# HR-EI-MS of compound 20

## Elemental Composition Report

Page 1

### Single Mass Analysis

Tolerance = 10.0 PPM / DBE: min = -10.0, max = 120.0

Selected filters: None

Monoisotopic Mass, Odd and Even Electron Ions

18 formula(e) evaluated with 1 results within limits (up to 51 closest results for each mass)

Elements Used:

C: 0-200 H: 0-400 N: 2-2 O: 4-6

PMF9

13:35:45 08-Jul-2016

Voltage EI+

KIB  
M160711EA-03AFAMM 16 (1.469)  
412.1992

Autospec Premier  
P776  
106

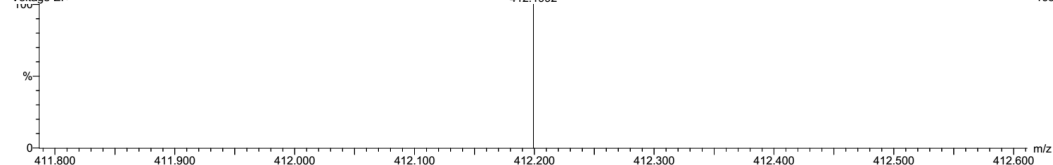

|          |            |      |      |       |           |               |
|----------|------------|------|------|-------|-----------|---------------|
| Minimum: |            |      |      | -10.0 |           |               |
| Maximum: | 200.0      | 10.0 |      | 120.0 |           |               |
| Mass     | Calc. Mass | mDa  | PPM  | DBE   | i-FIT     | Formula       |
| 412.1992 | 412.1998   | -0.6 | -1.5 | 11.0  | 5546068.5 | C23 H28 N2 O5 |

## <sup>1</sup>H-NMR of compound 21

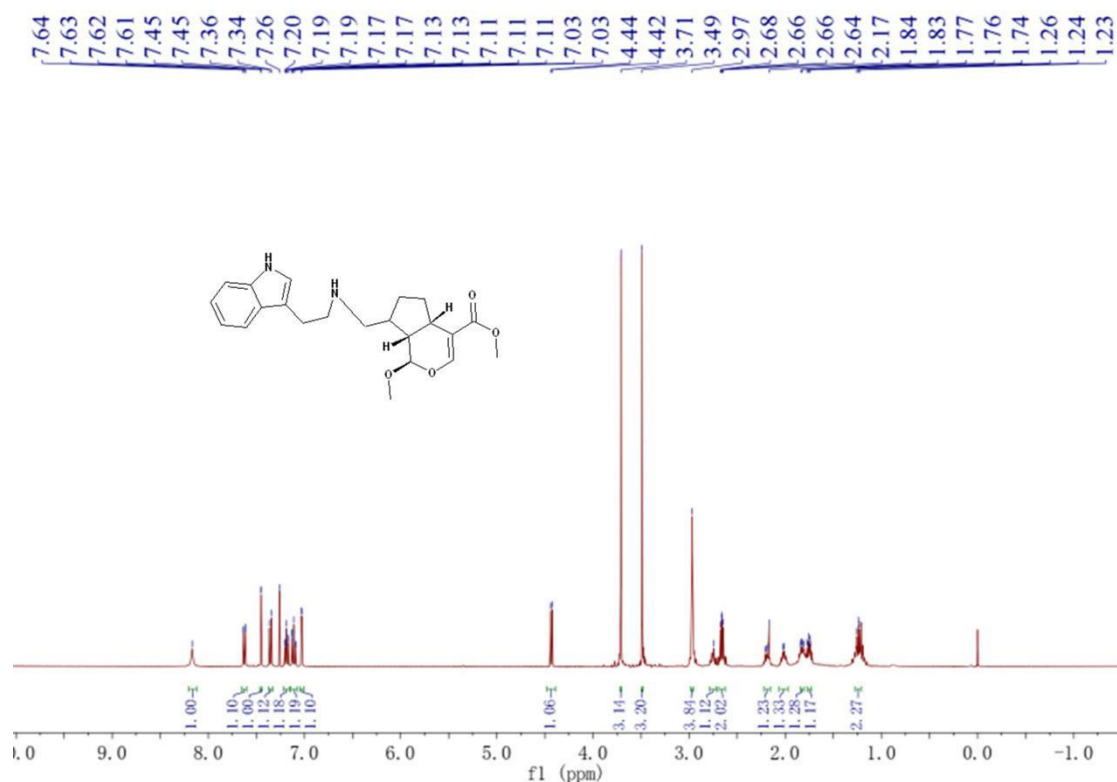

$^{13}\text{C}$ -NMR of compound **21**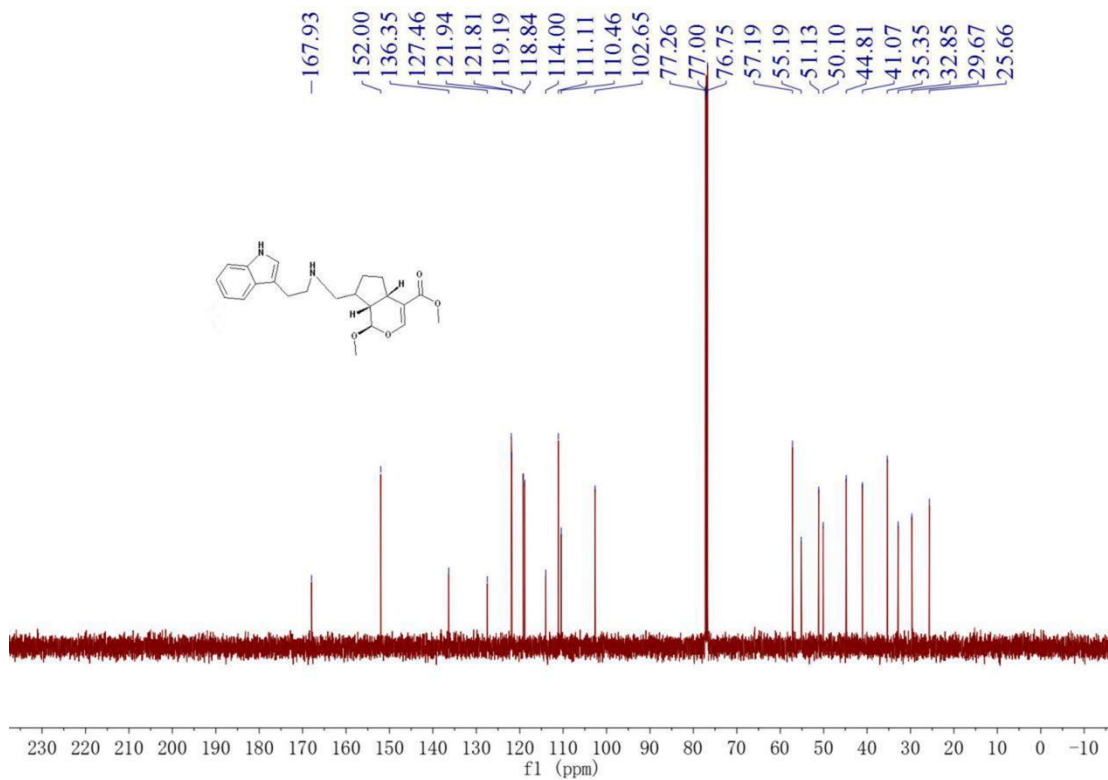HR-EI-MS of compound **21**

## Elemental Composition Report

Page 1

## Single Mass Analysis

Tolerance = 10.0 PPM / DBE: min = -10.0, max = 120.0

Selected filters: None

Monoisotopic Mass, Odd and Even Electron Ions  
18 formula(e) evaluated with 1 results within limits (up to 51 closest results for each mass)

Elements Used:

C: 0-200 H: 0-400 N: 2-2 O: 3-5

13:53:53 08-Jul-2016

Voltage El+

KIB  
M160711EA-07AFAMM 13 (1.193)  
384.2043

Autospec Premier  
P776  
13.4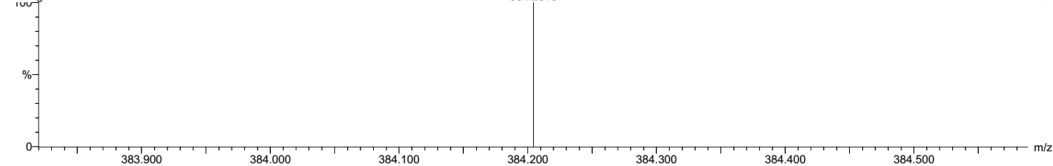

|          |       |      |       |
|----------|-------|------|-------|
| Minimum: |       |      | -10.0 |
| Maximum: | 200.0 | 10.0 | 120.0 |

| Mass     | Calc. Mass | mDa  | PPM  | DBE  | i-FIT     | Formula       |
|----------|------------|------|------|------|-----------|---------------|
| 384.2043 | 384.2049   | -0.6 | -1.6 | 10.0 | 5546027.0 | C22 H28 N2 O4 |

<sup>1</sup>H-NMR of compound **22**

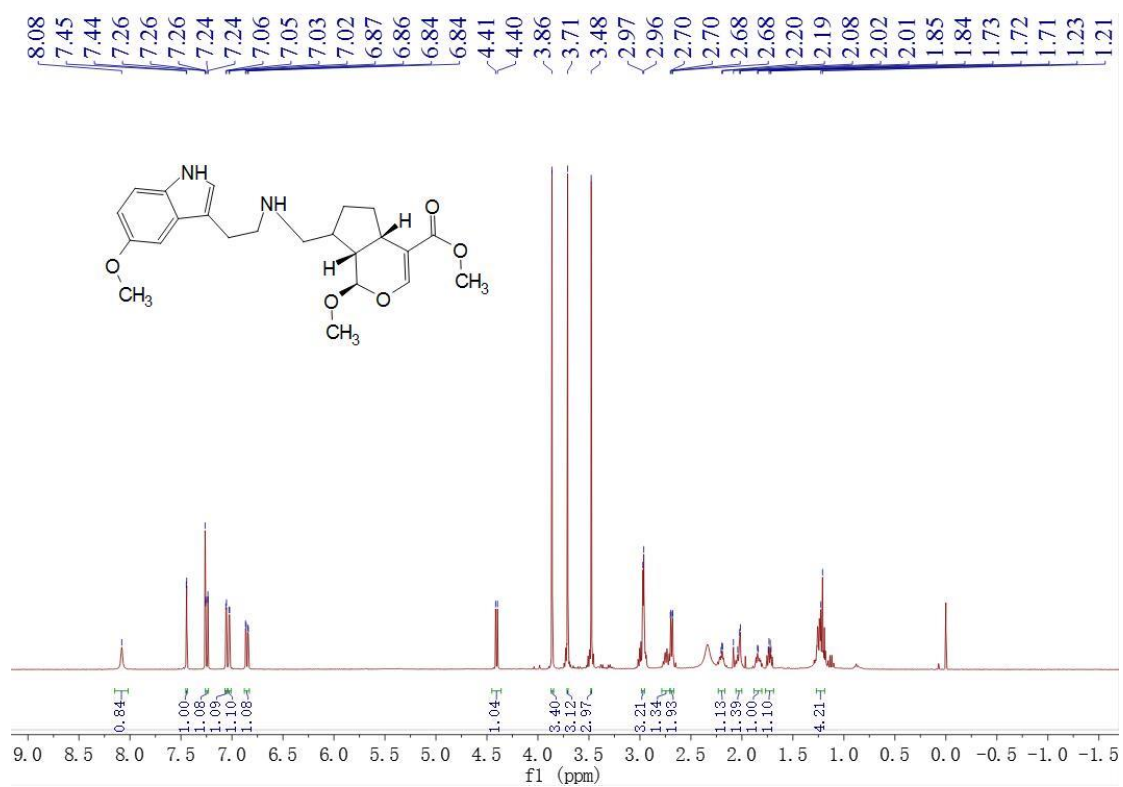

<sup>13</sup>C-NMR of compound **22**

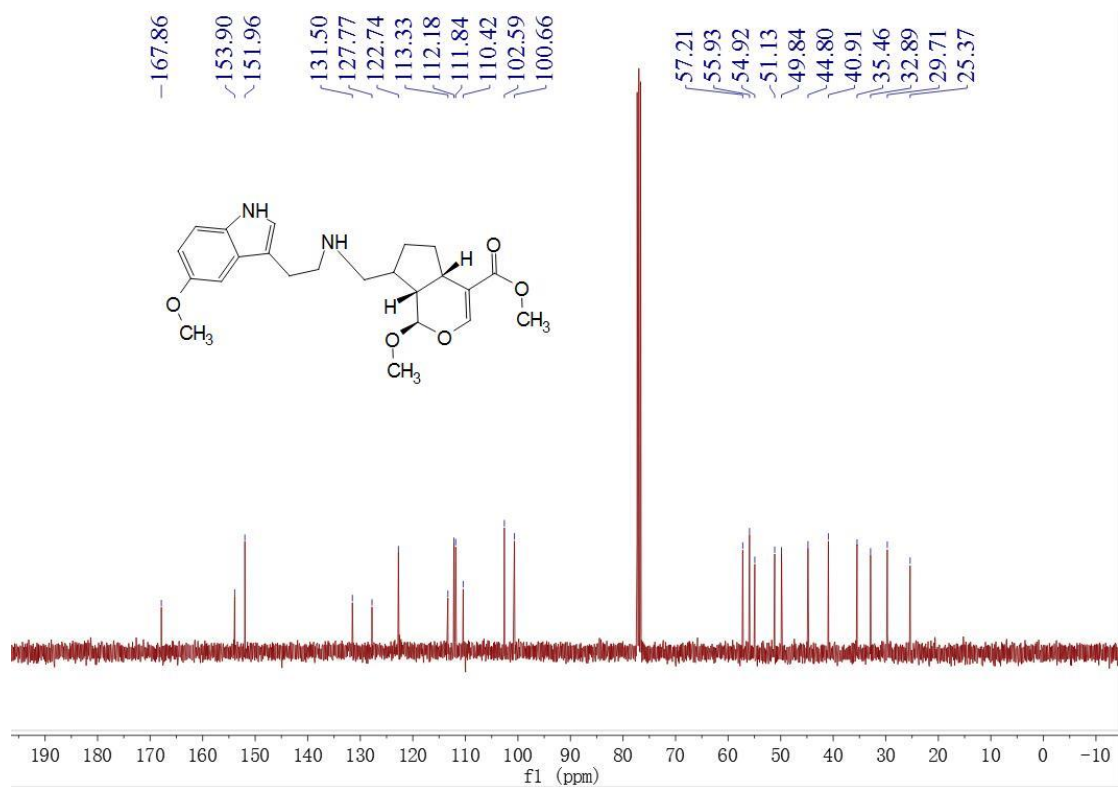

# HR-EI-MS of compound 22

## Elemental Composition Report

Page 1

### Single Mass Analysis

Tolerance = 10.0 PPM / DBE: min = -10.0, max = 120.0

Selected filters: None

Monoisotopic Mass, Odd and Even Electron Ions

23 formula(e) evaluated with 1 results within limits (up to 51 closest results for each mass)

Elements Used:

C: 0-200 H: 0-400 N: 2-2 O: 4-7

PMF6

13:49:20 08-Jul-2016

Voltage EI+

KIB  
M160711EA-06AFAMM 11 (1.010)  
414.2151

Autospec Premier  
P776  
13.6

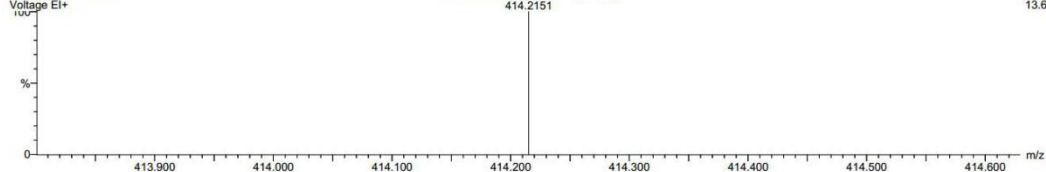

Minimum: 200.0 10.0 -10.0  
Maximum: 120.0

| Mass     | Calc. Mass | mDa  | PPM  | DBE  | i-FIT     | Formula       |
|----------|------------|------|------|------|-----------|---------------|
| 414.2151 | 414.2155   | -0.4 | -1.0 | 10.0 | 5546027.0 | C23 H30 N2 O5 |

# <sup>1</sup>H-NMR of compound 23

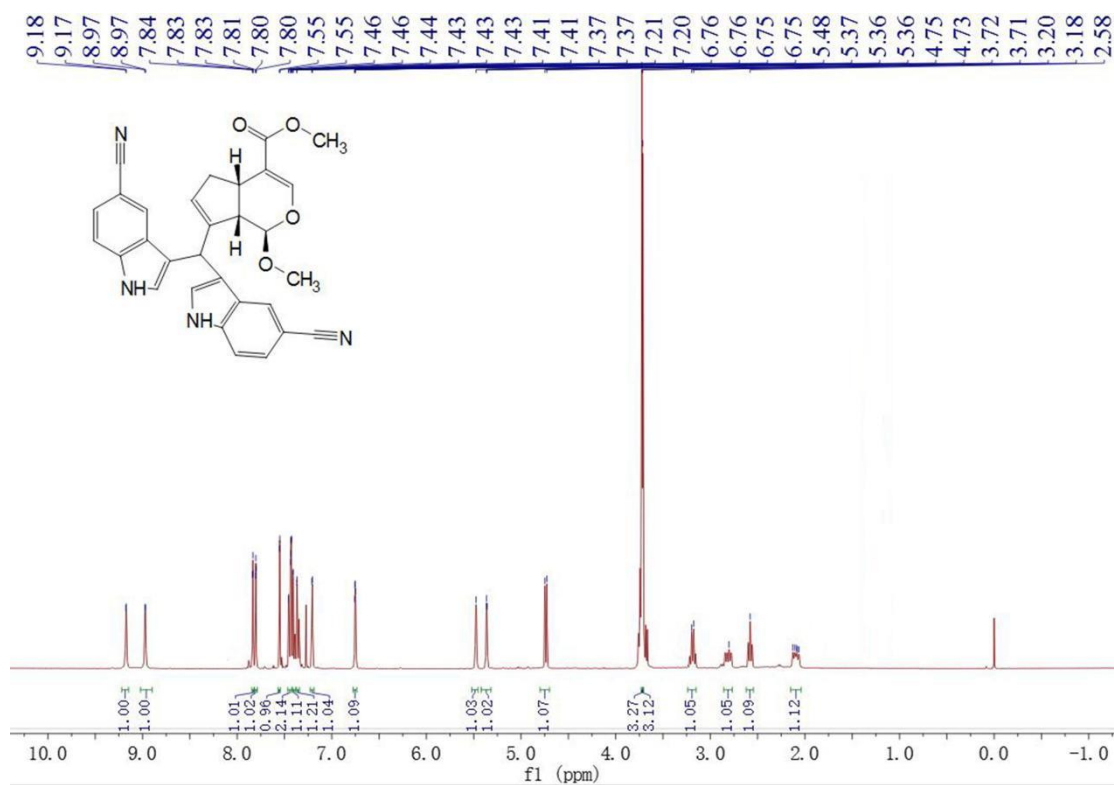

### $^{13}\text{C}$ -NMR of compound **23**

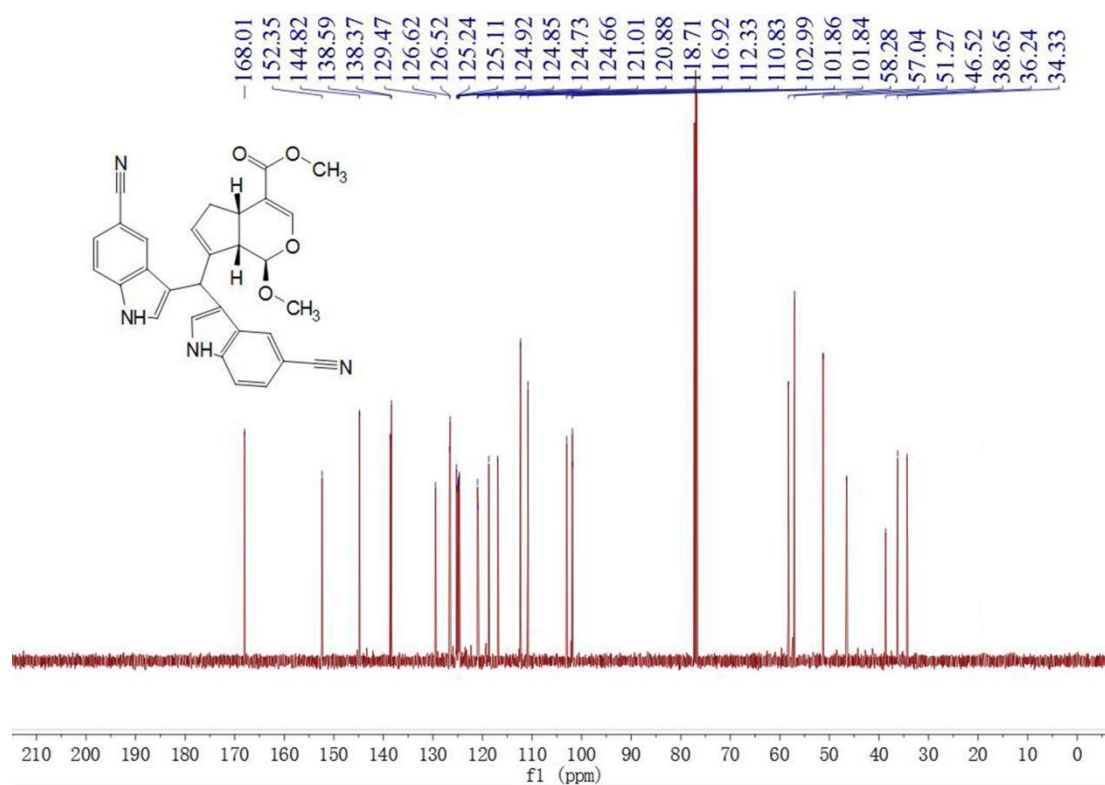

### HR-EI-MS of compound **23**

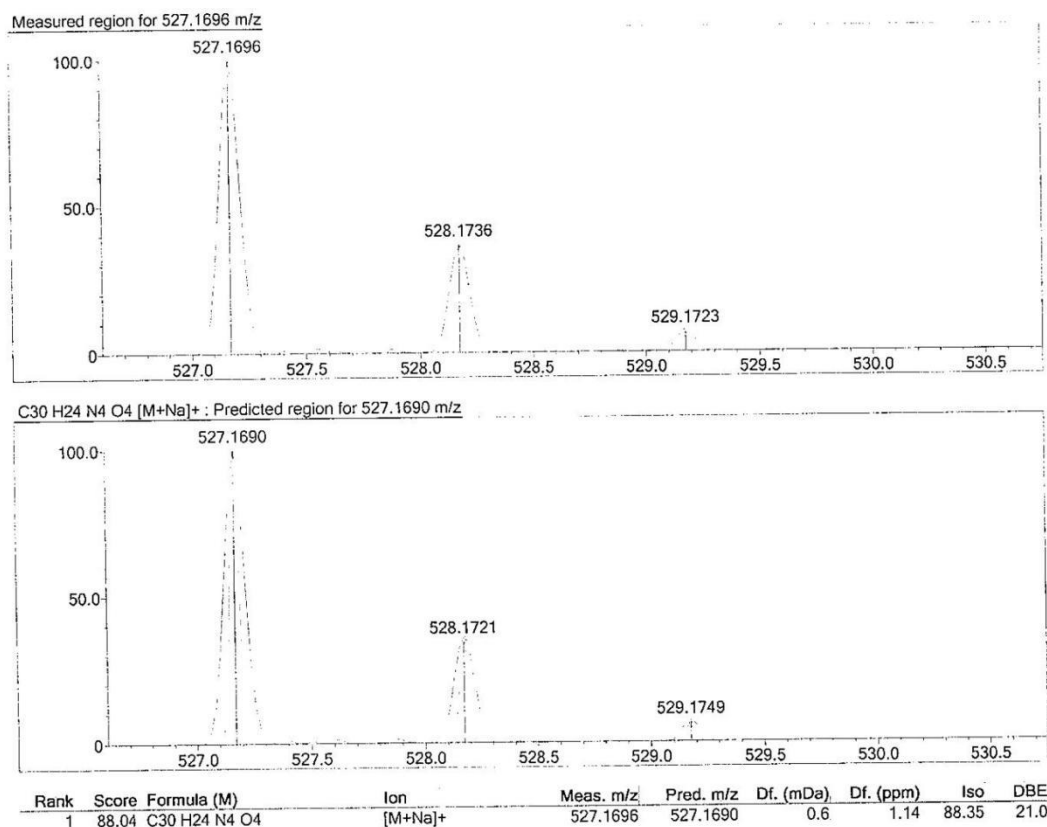



<sup>1</sup>H-NMR of compound **24**

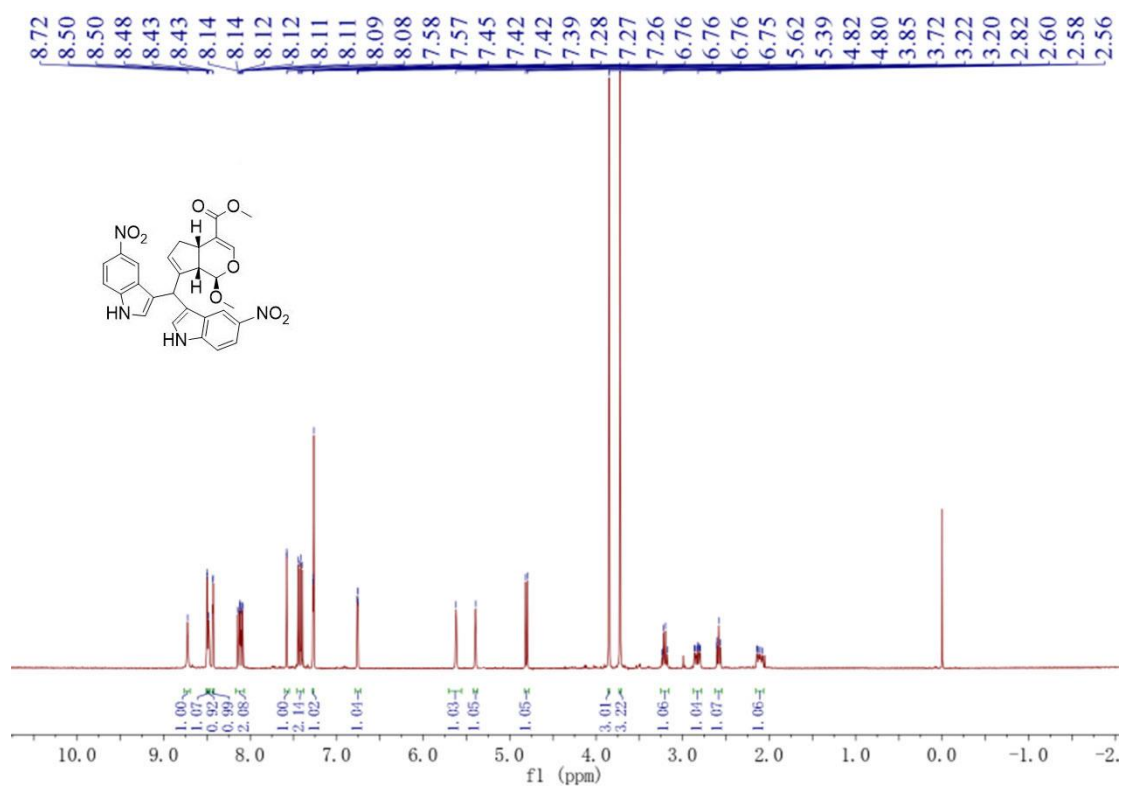

<sup>13</sup>C-NMR of compound **24**

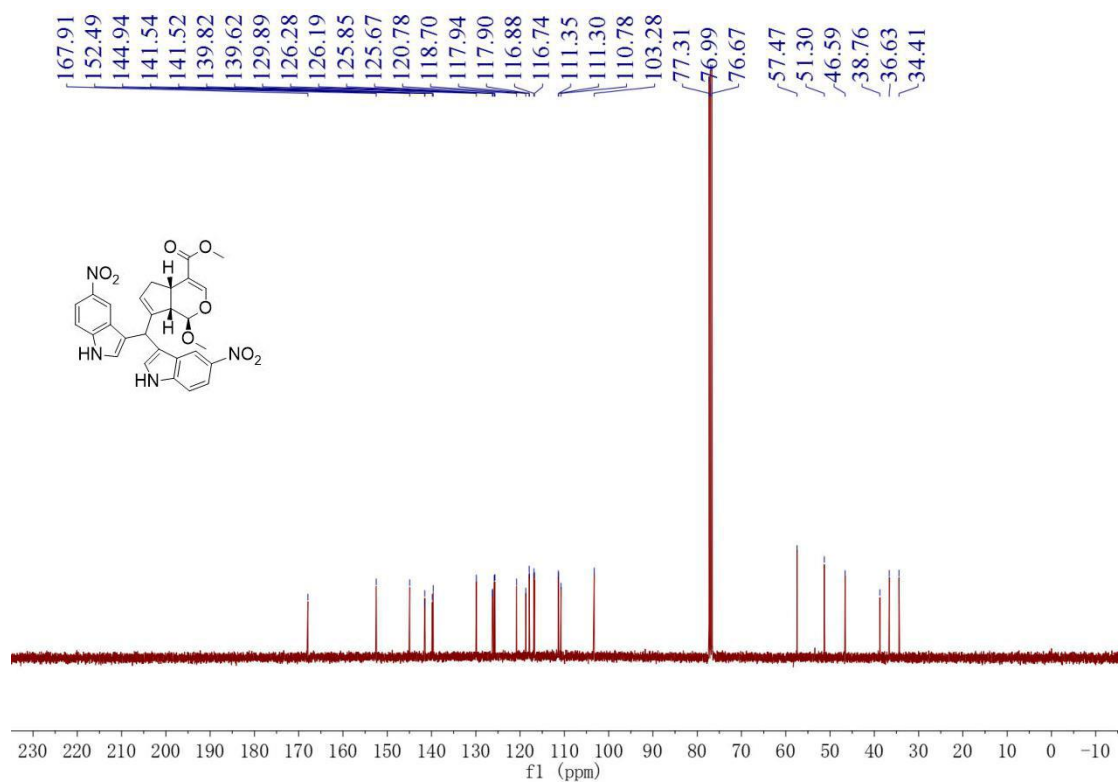



## HR-EI-MS of compound **24**

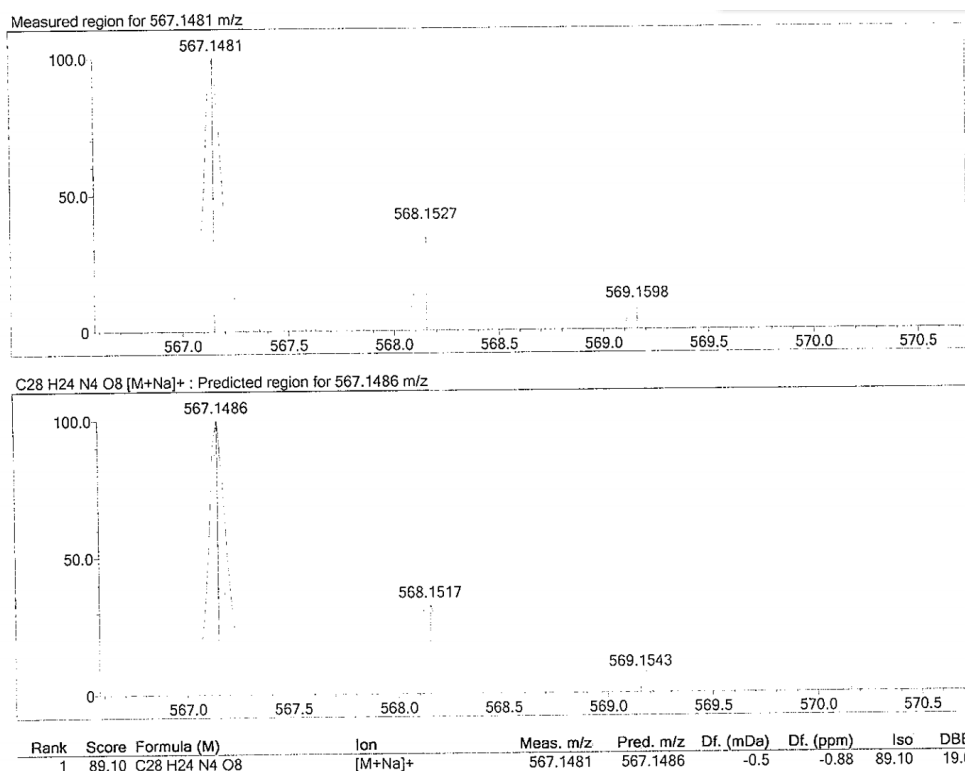

## <sup>1</sup>H-NMR of compound **25**

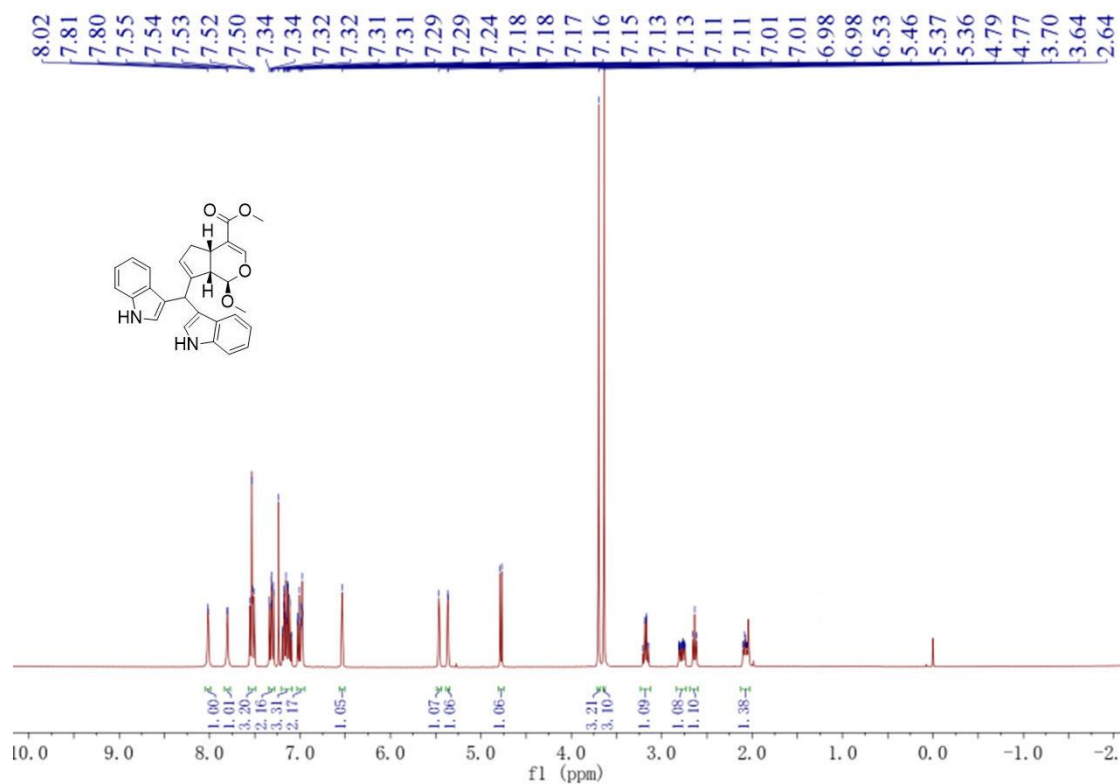

# <sup>13</sup>C-NMR of compound **25**

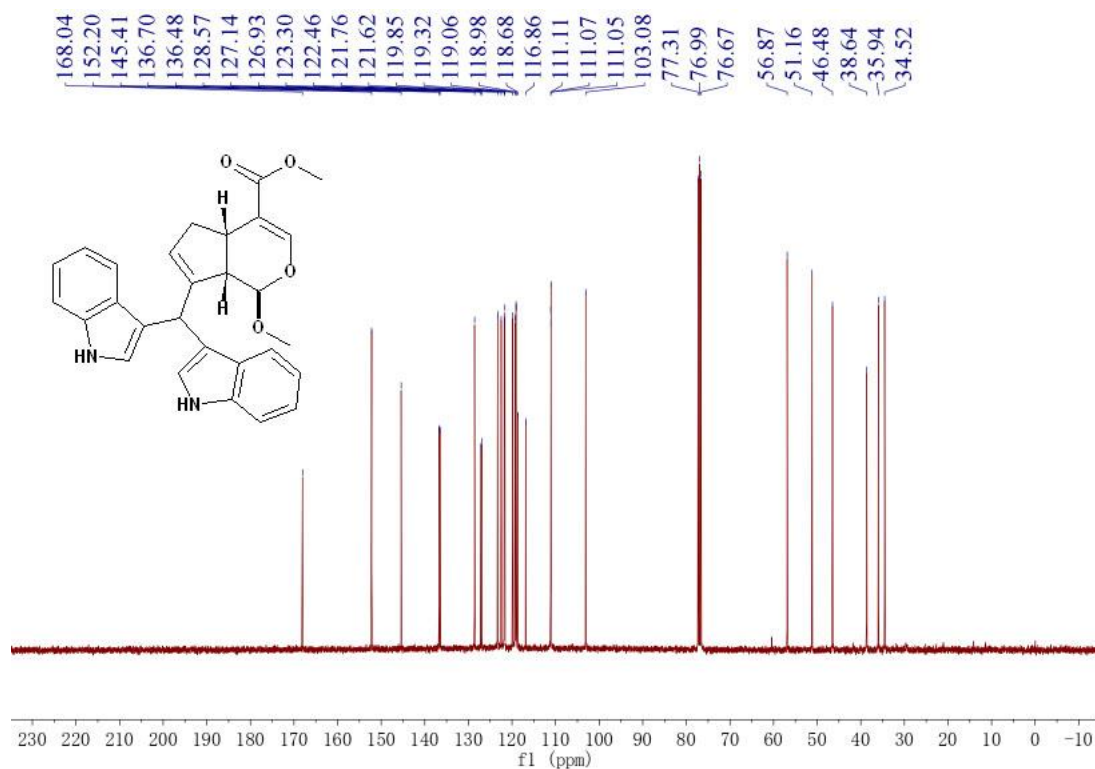

# HR-EI-MS of compound **25**

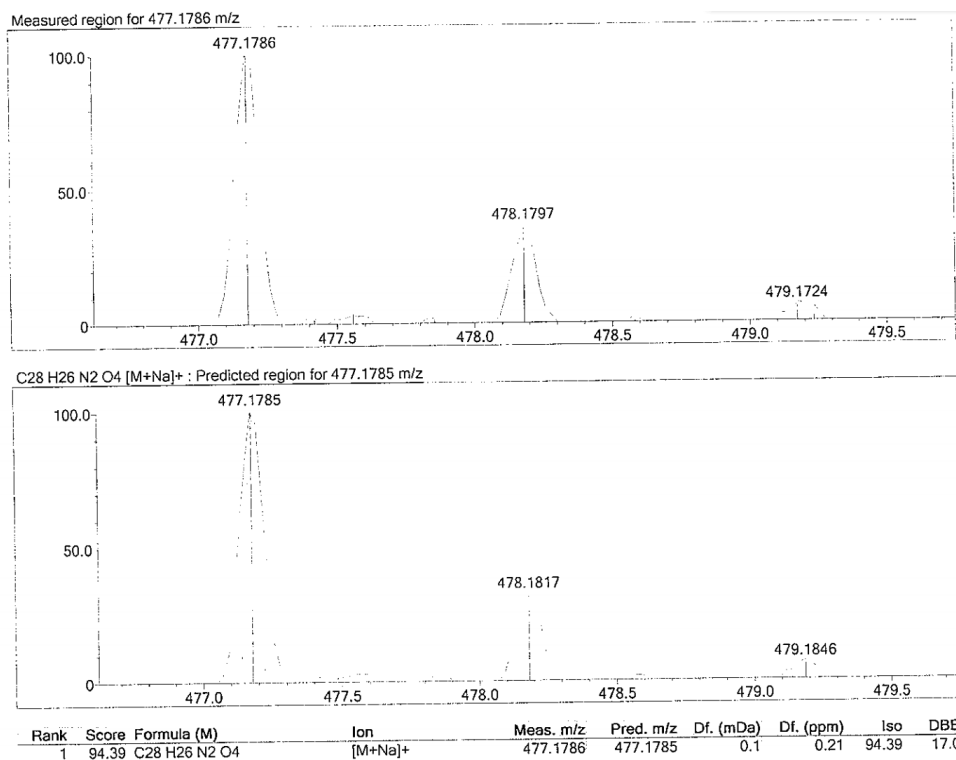

<sup>1</sup>H-NMR of compound **26**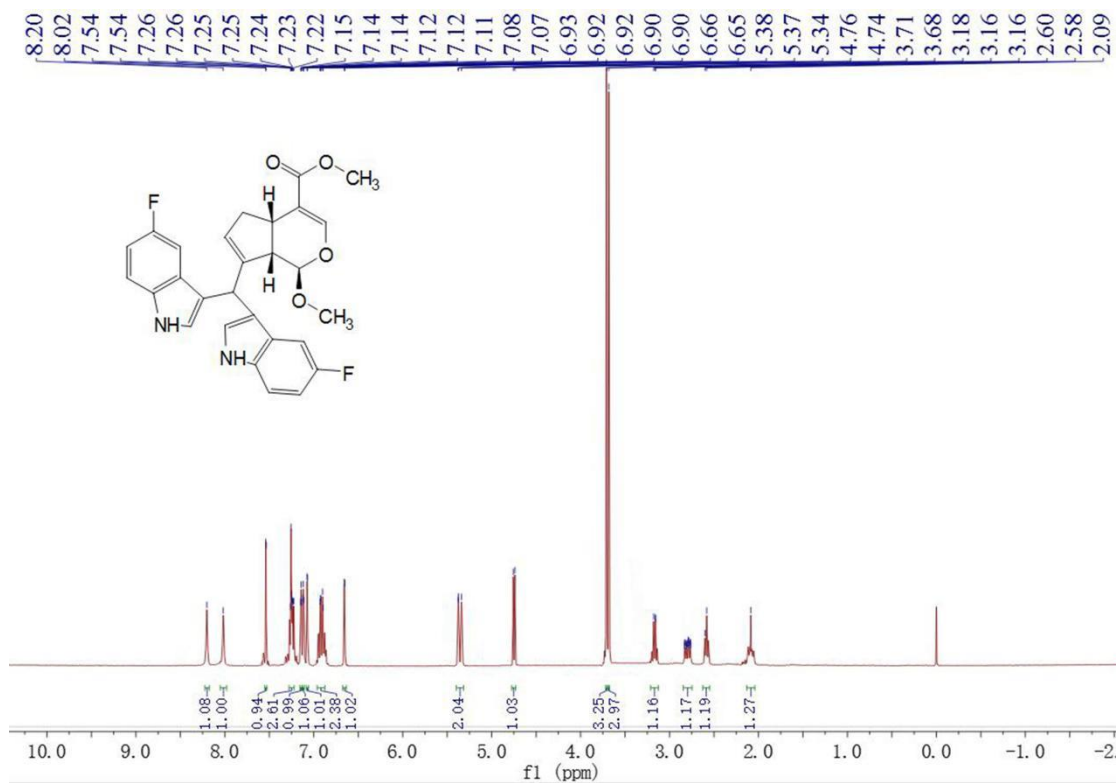 $^{13}\text{C}$ -NMR of compound **26**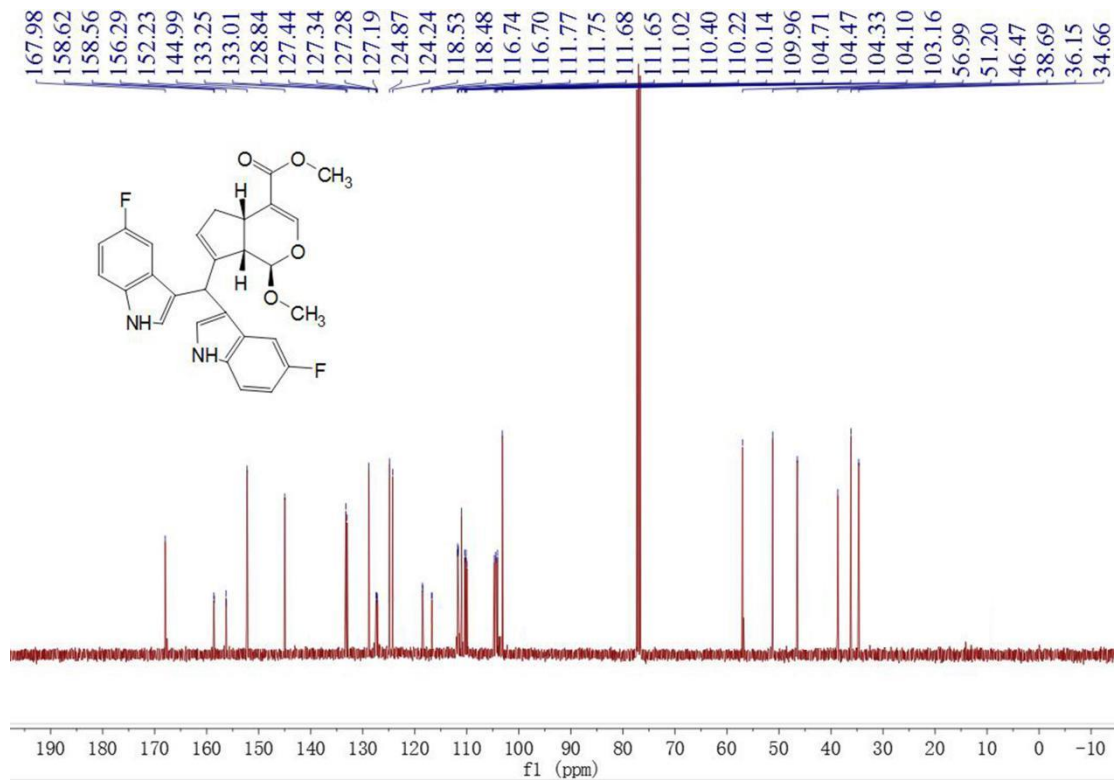

## HR-EI-MS of compound 26

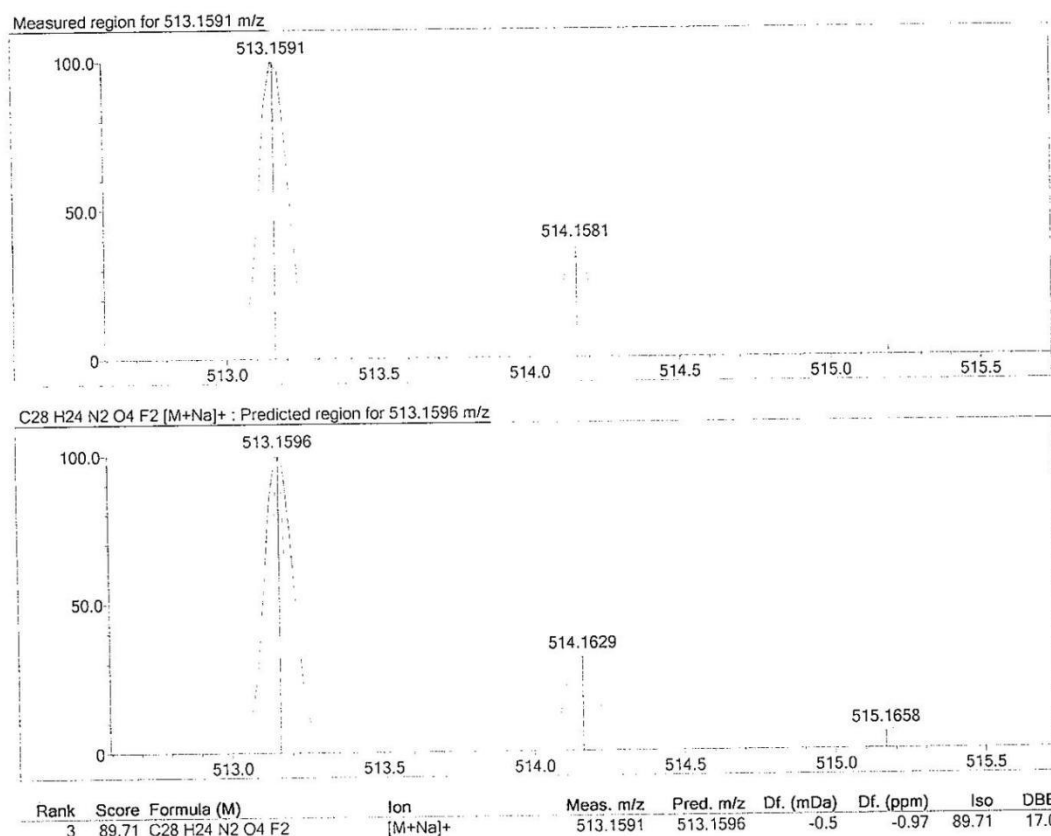

## <sup>1</sup>H-NMR of compound 27

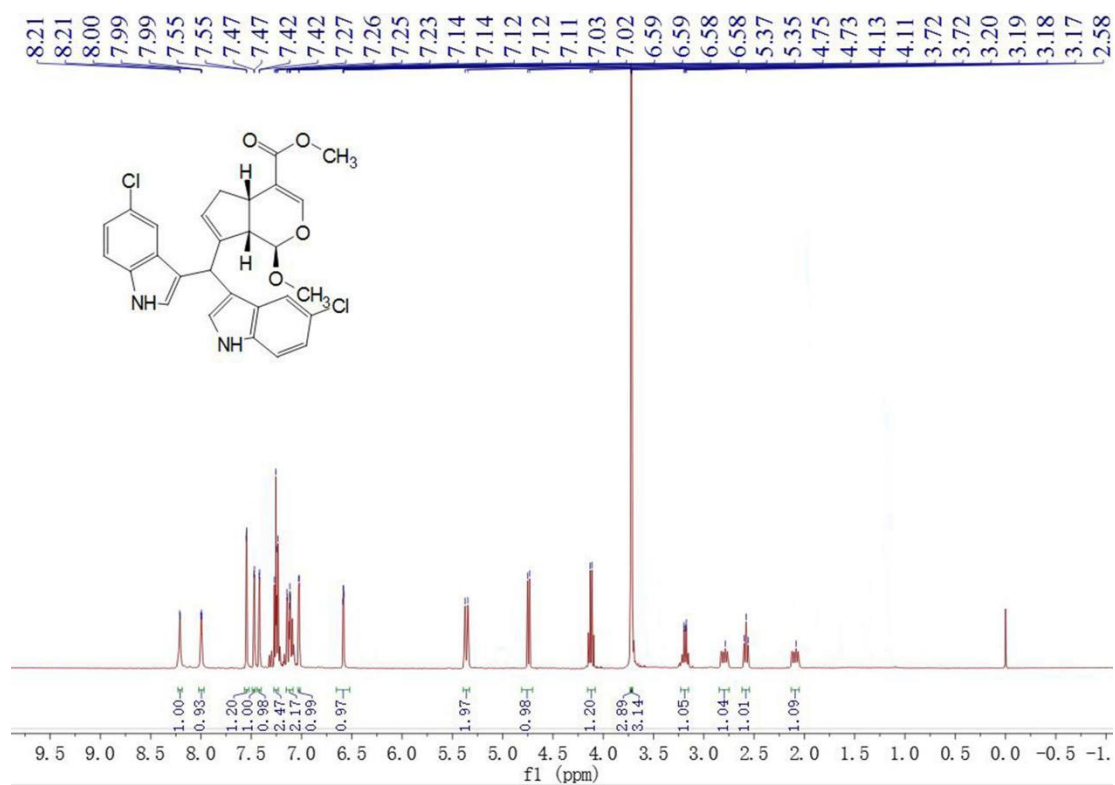

# <sup>13</sup>C-NMR of compound **27**

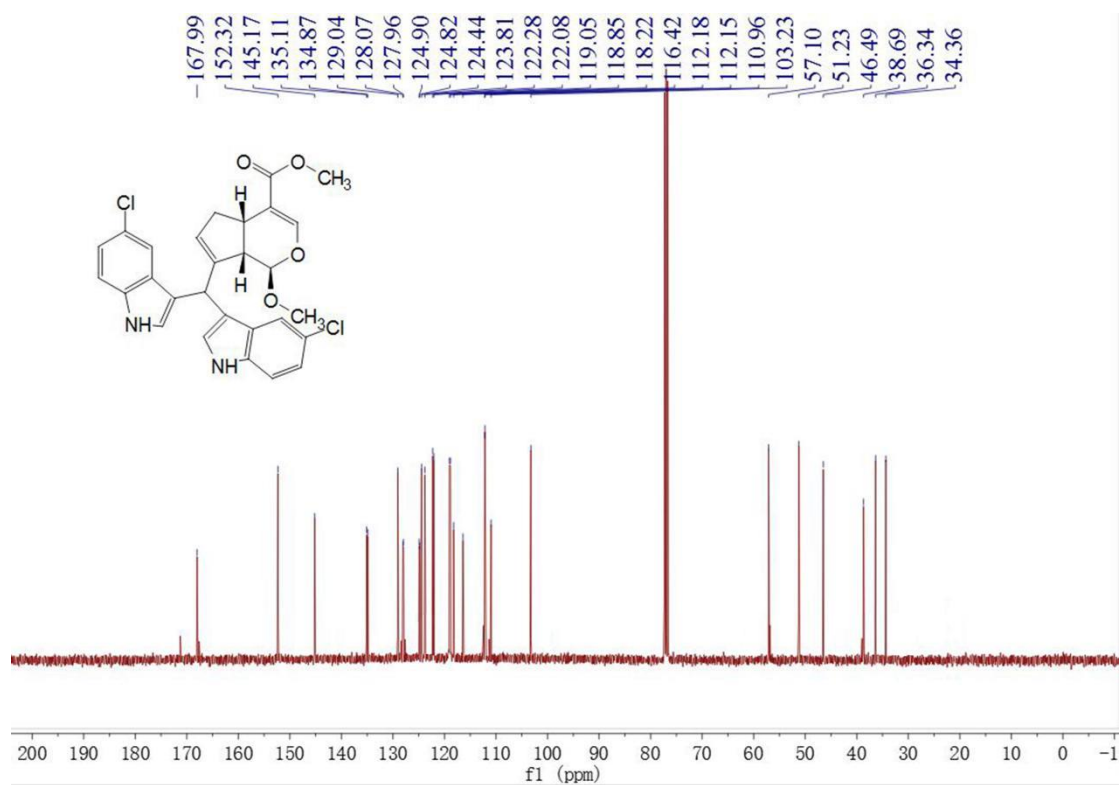

## HR-EI-MS of compound **27**

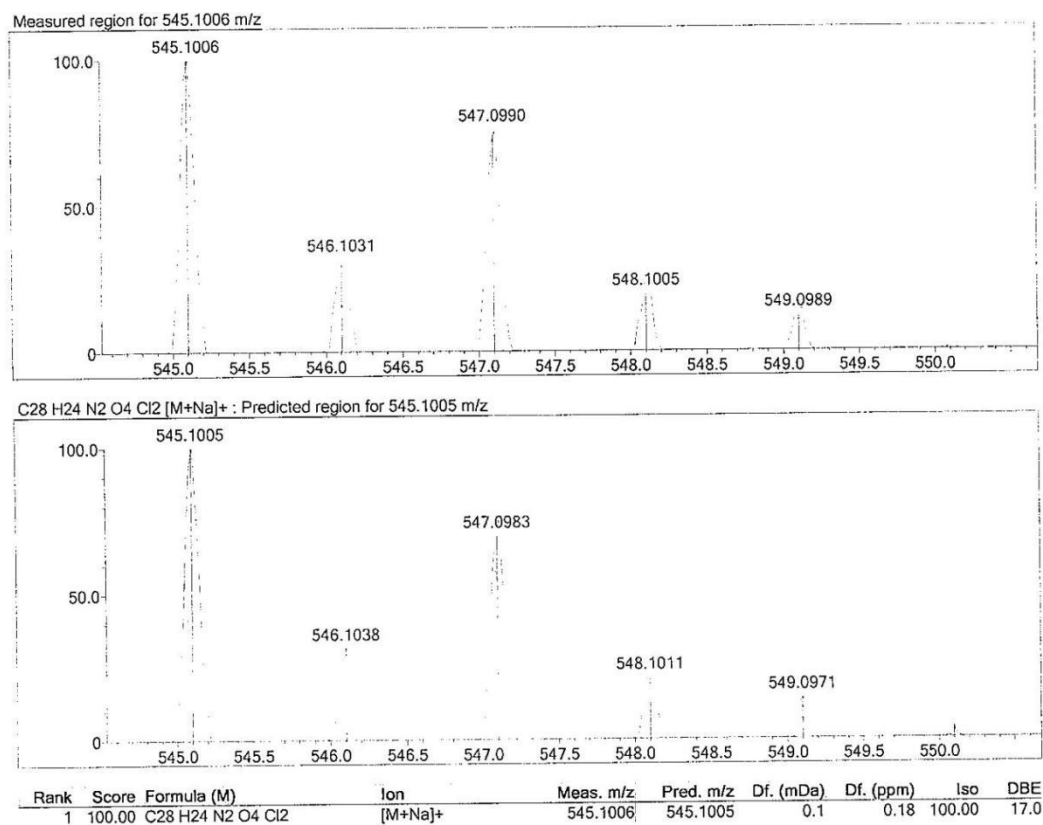

<sup>1</sup>H-NMR of compound **28**

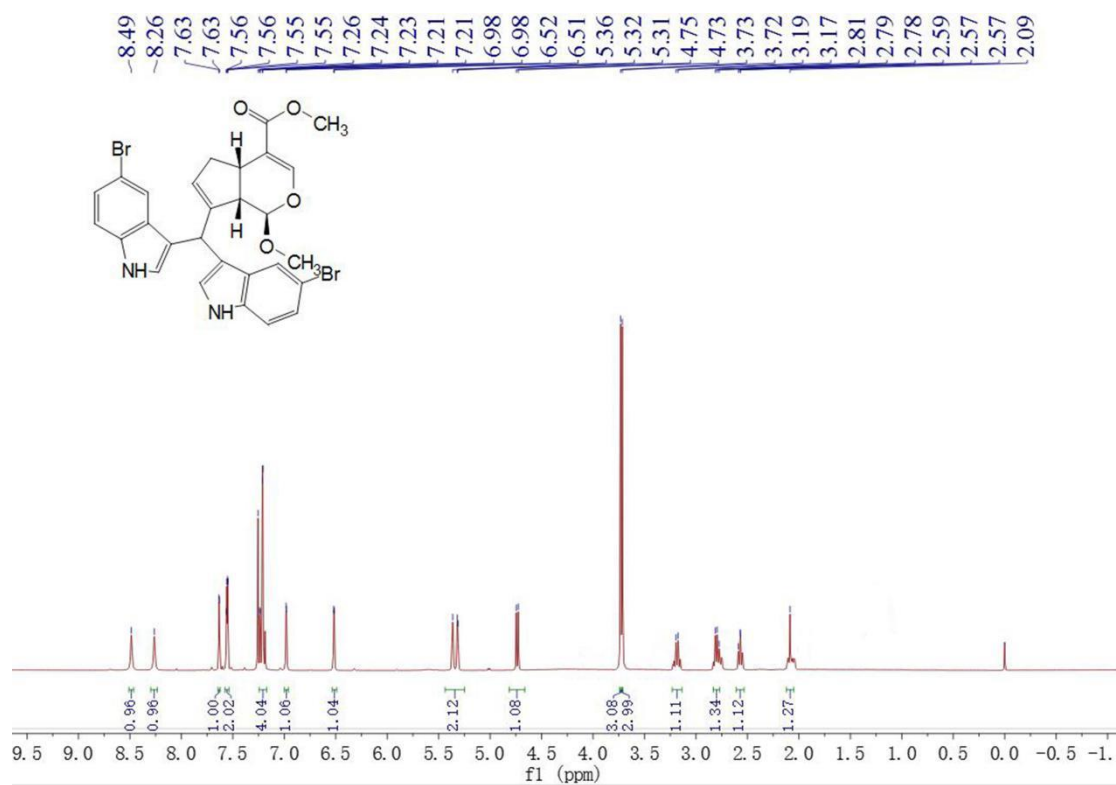

<sup>13</sup>C-NMR of compound **28**

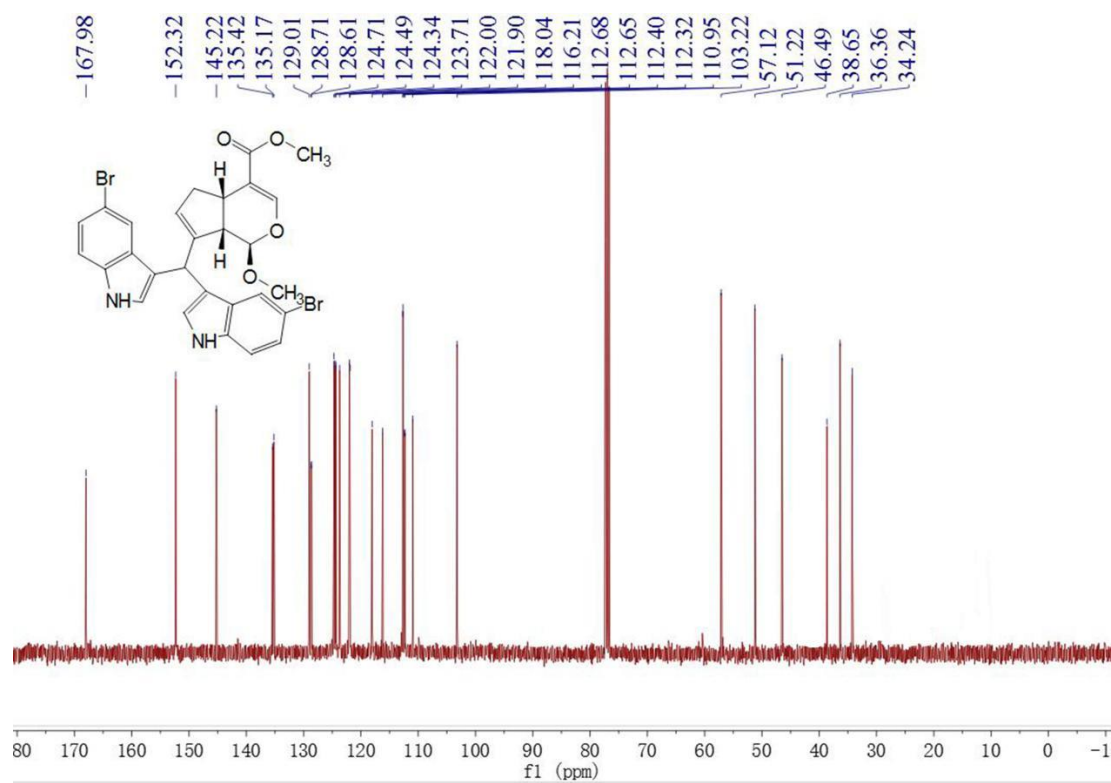



## HR-EI-MS of compound **28**

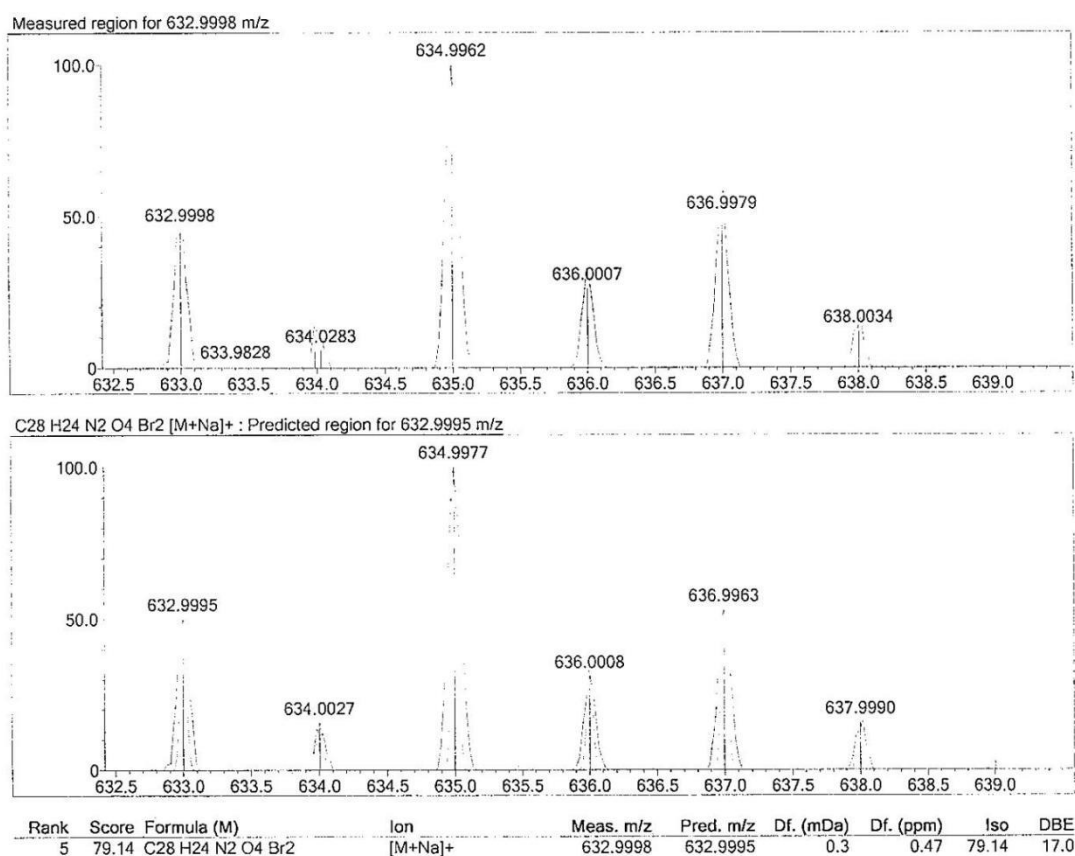

## <sup>1</sup>H-NMR of compound **29**

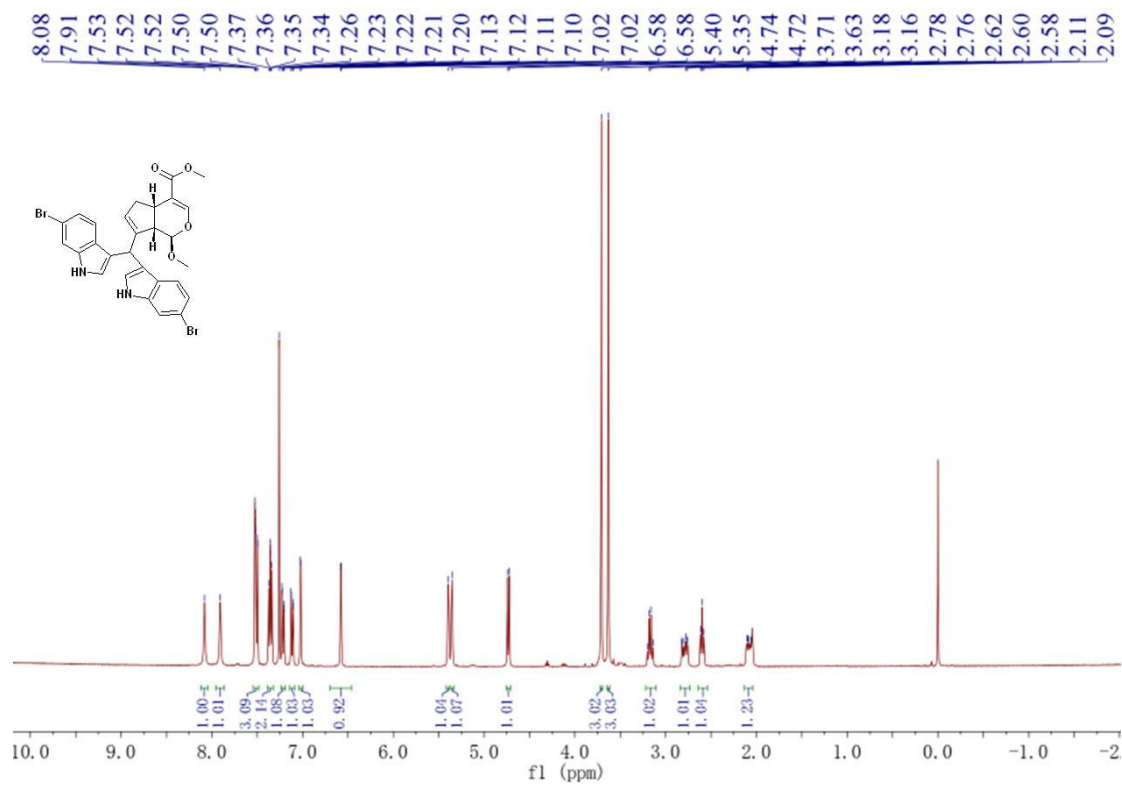

# <sup>13</sup>C-NMR of compound **29**

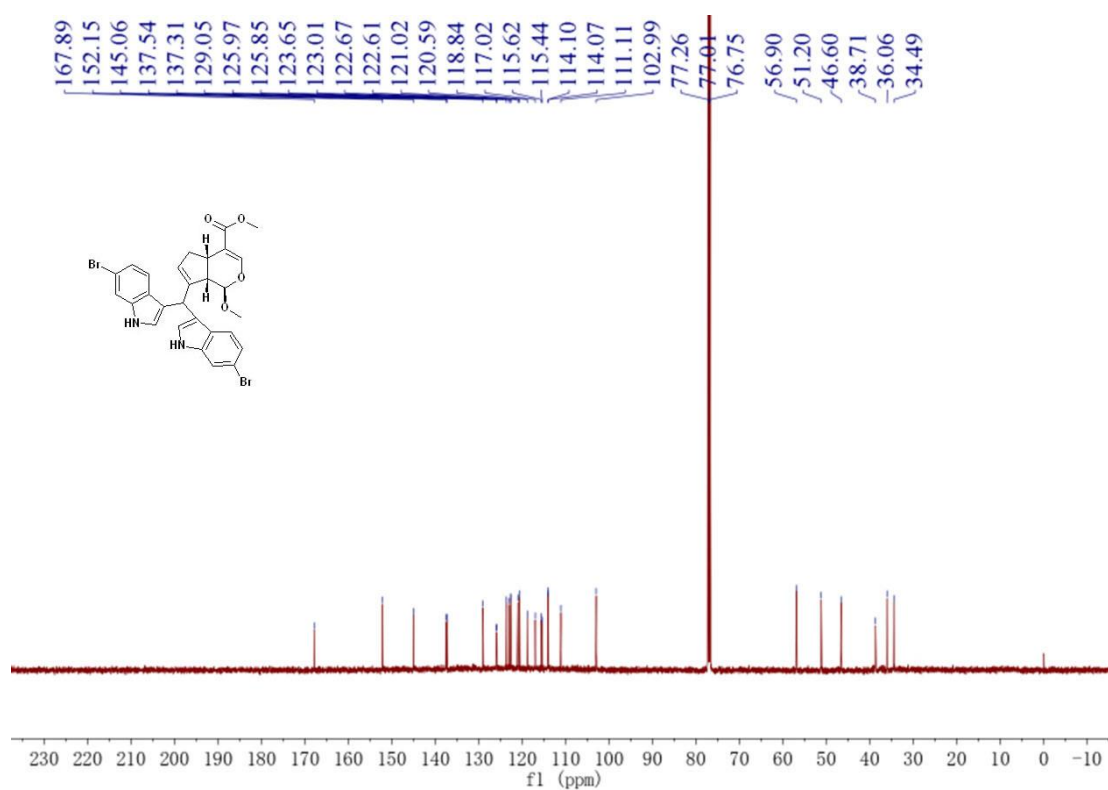

## HR-EI-MS of compound **29**

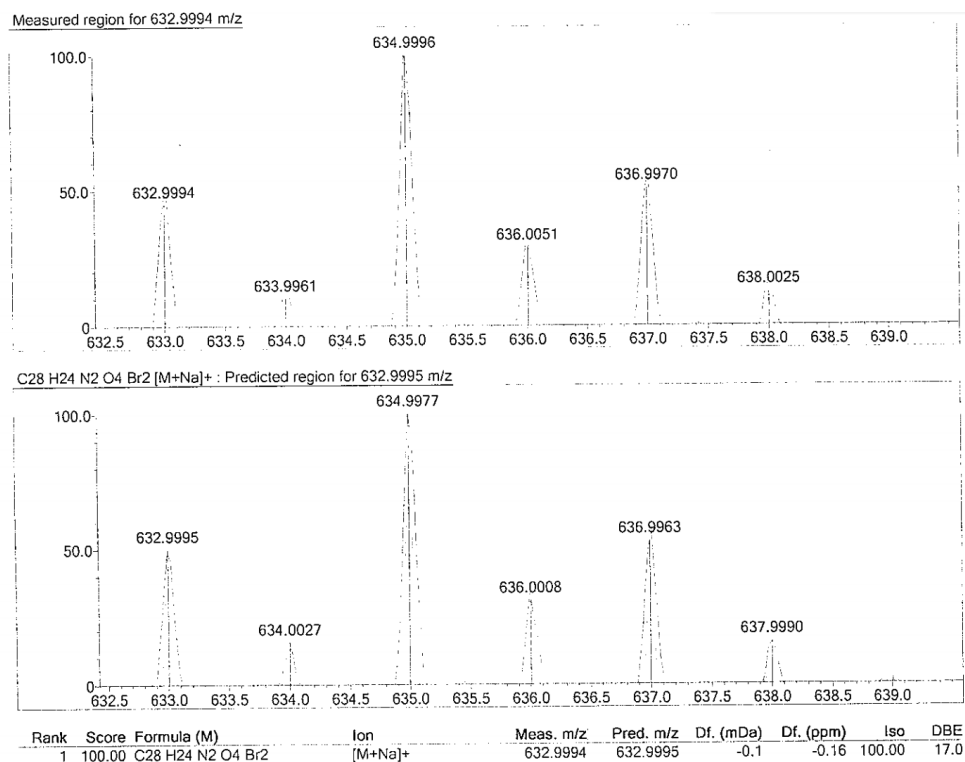



<sup>1</sup>H-NMR of compound **30**

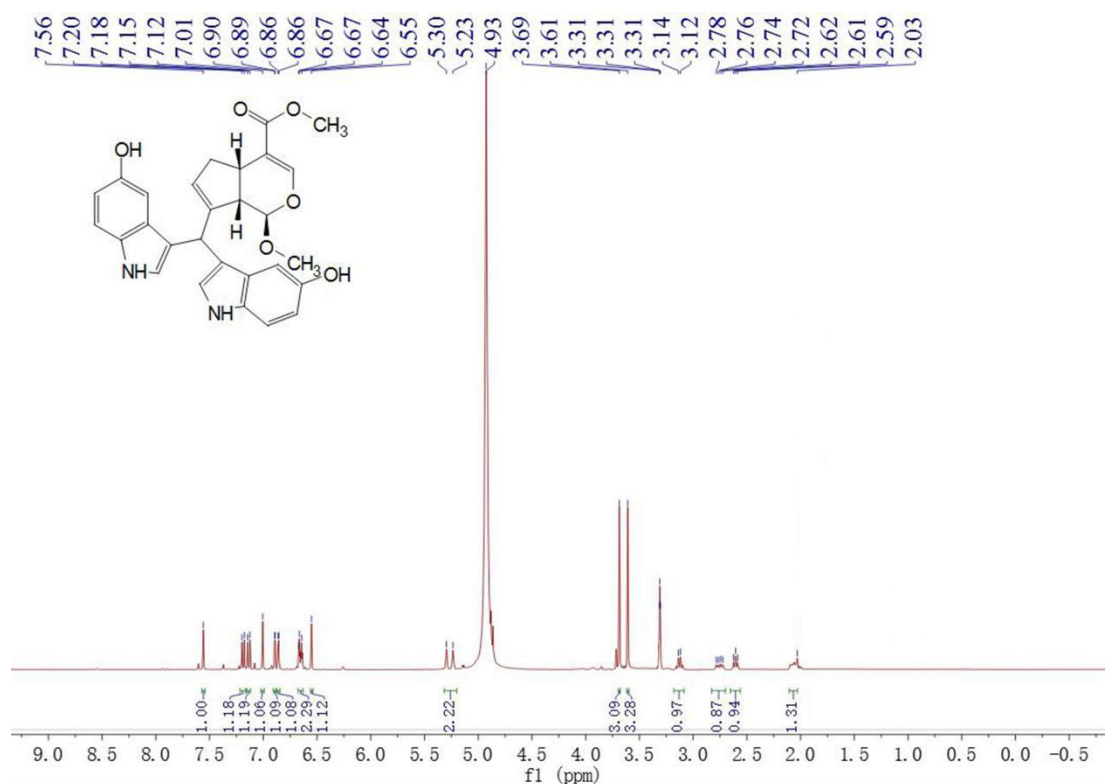

<sup>13</sup>C-NMR of compound **30**

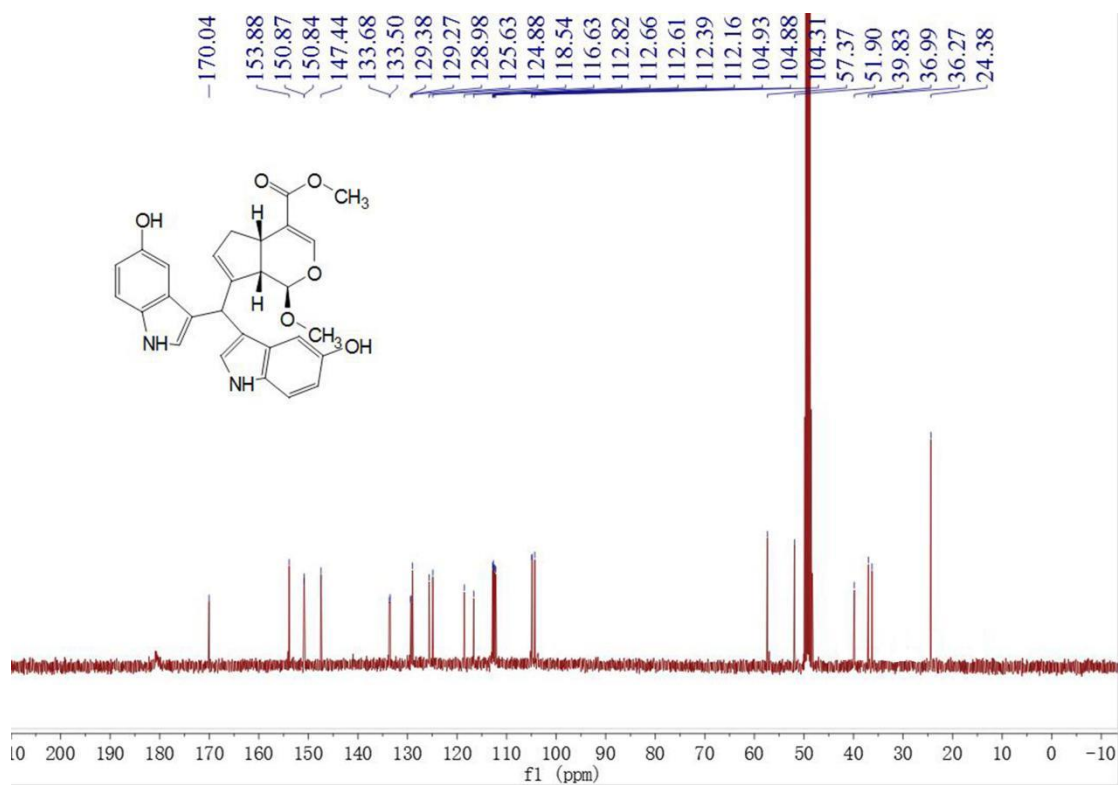

# HR-EI-MS of compound 30

Formula Predictor Report - F21.lcd

Page 1 of 1

Data File: E:\DATA\2018\0206\F21.lcd

| Elmt | Val. | Min | Max | Use Adduct |
|------|------|-----|-----|------|------|-----|-----|------|------|-----|-----|------|------|-----|-----|------------|
| H    | 1    | 0   | 100 | O    | 2    | 0   | 50  | Si   | 4    | 0   | 0   | Br   | 1    | 0   | 0   | Na         |
| C    | 4    | 0   | 100 | F    | 1    | 0   | 0   | S    | 2    | 0   | 0   | I    | 3    | 0   | 0   |            |
| N    | 3    | 0   | 10  | Na   | 1    | 0   | 0   | Cl   | 1    | 0   | 0   |      |      |     |     |            |

Error Margin (ppm): 5  
 HC Ratio: unlimited  
 Max Isotopes: all  
 MSn Iso RI (%): 75.00

DBE Range: -2.0 - 100.0  
 Apply N Rule: yes  
 Isotope RI (%): 1.00  
 MSn Logic Mode: AND

Electron Ions: both  
 Use MSn Info: yes  
 Isotope Res: 10000  
 Max Results: 10

Event#: 1 MS(E+) Ret. Time : 0.360 -> 0.680 Scan#: 55 -> 103

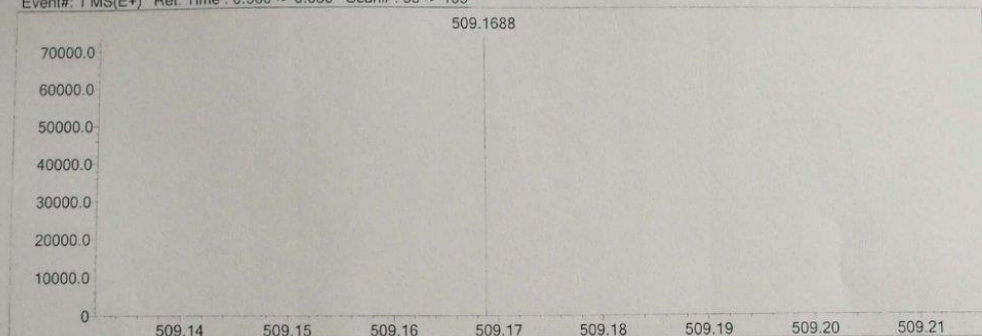

Measured region for 509.1688 m/z

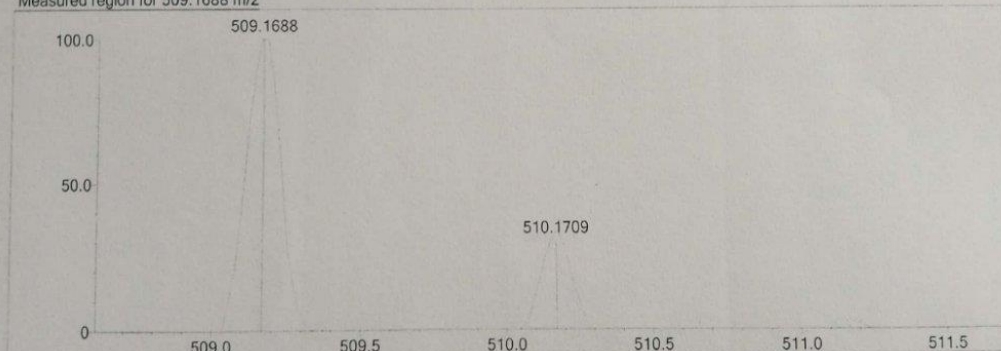

C28 H26 N2 O6 [M+Na]<sup>+</sup> : Predicted region for 509.1683 m/z

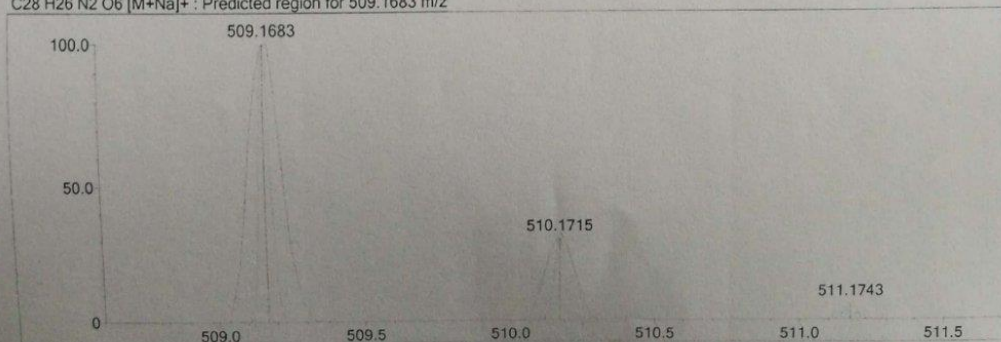

| Formula (M)   | Ion                 | Meas. m/z | Pred. m/z | Df. (mDa) | Df. (ppm) | DBE  |
|---------------|---------------------|-----------|-----------|-----------|-----------|------|
| C28 H26 N2 O6 | [M+Na] <sup>+</sup> | 509.1688  | 509.1683  | 0.5       | 0.98      | 17.0 |

<sup>1</sup>H-NMR of compound **31**

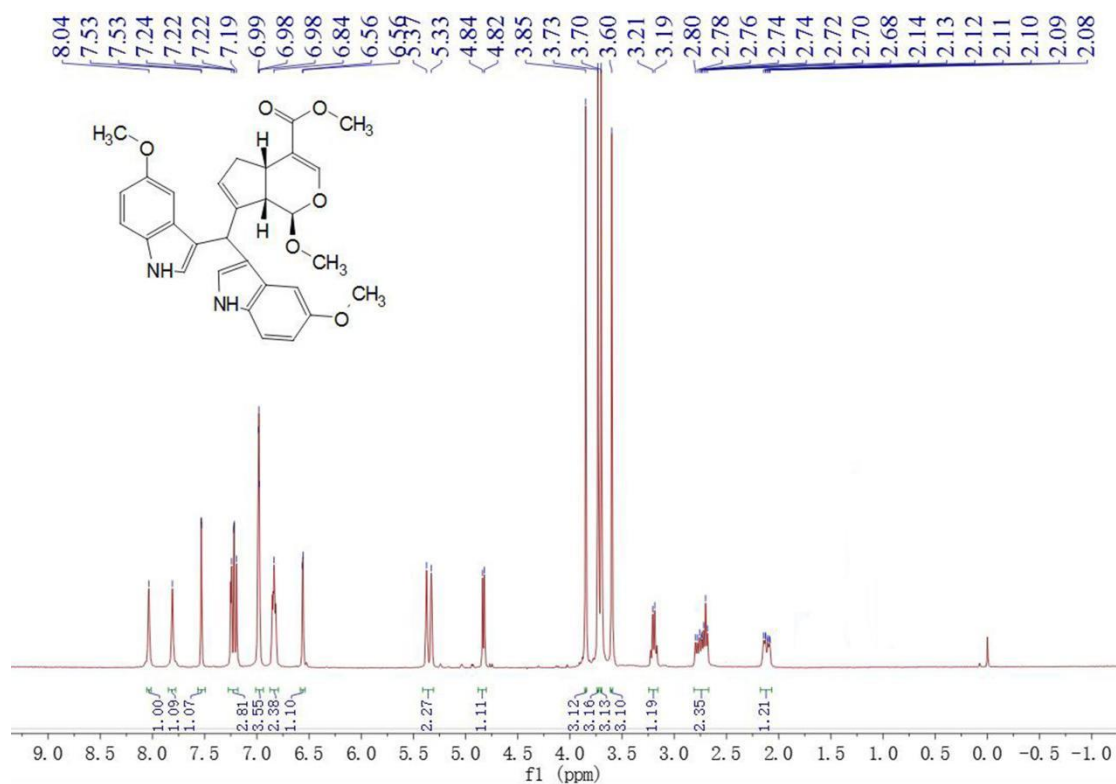

<sup>13</sup>C-NMR of compound **31**

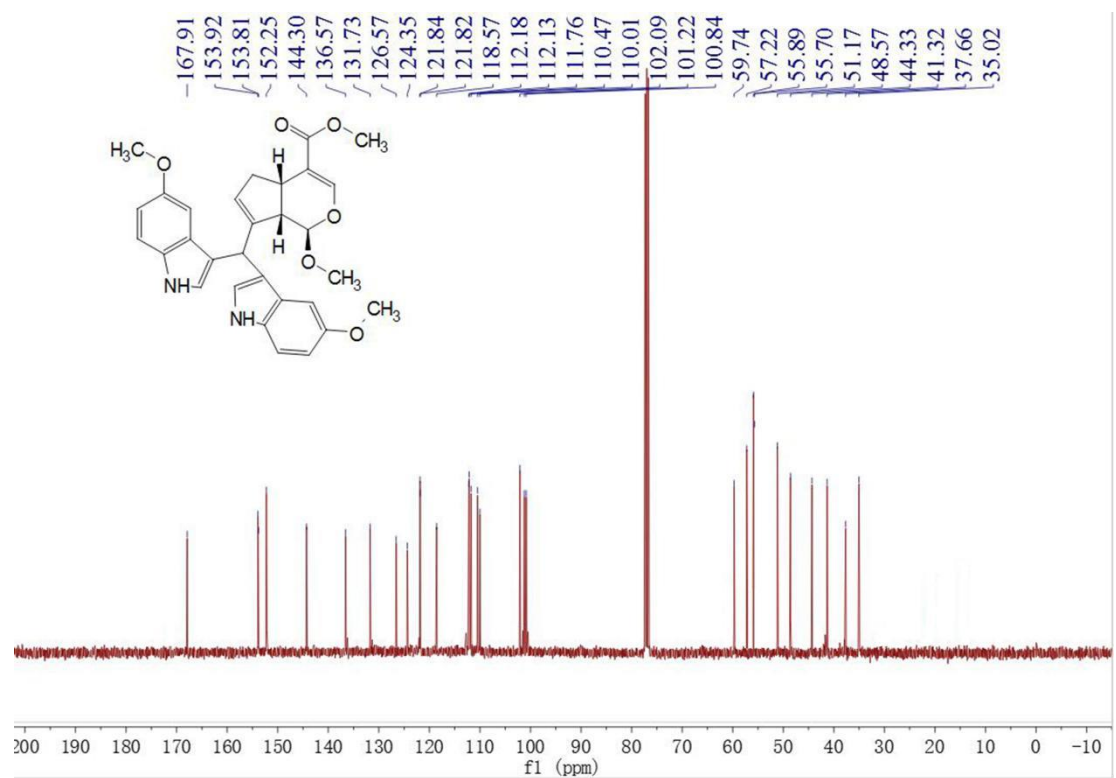

## HR-EI-MS of compound **31**

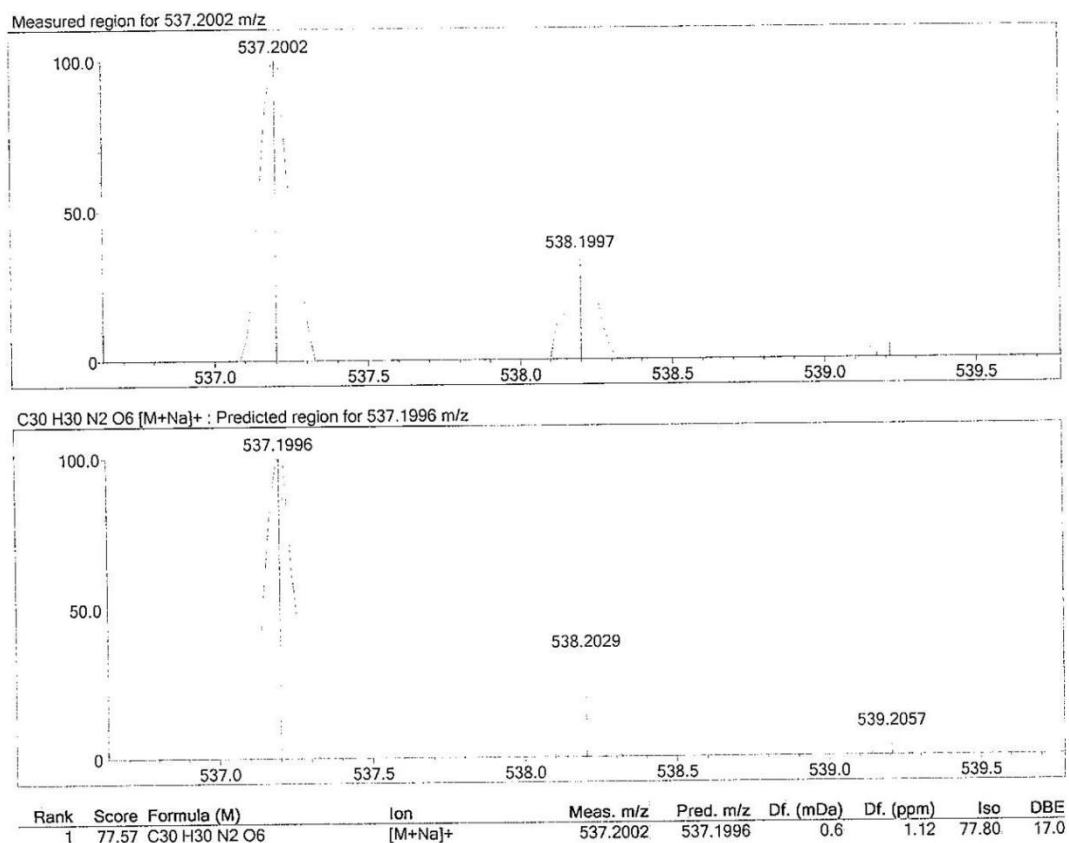

## <sup>1</sup>H-NMR of compound **32**

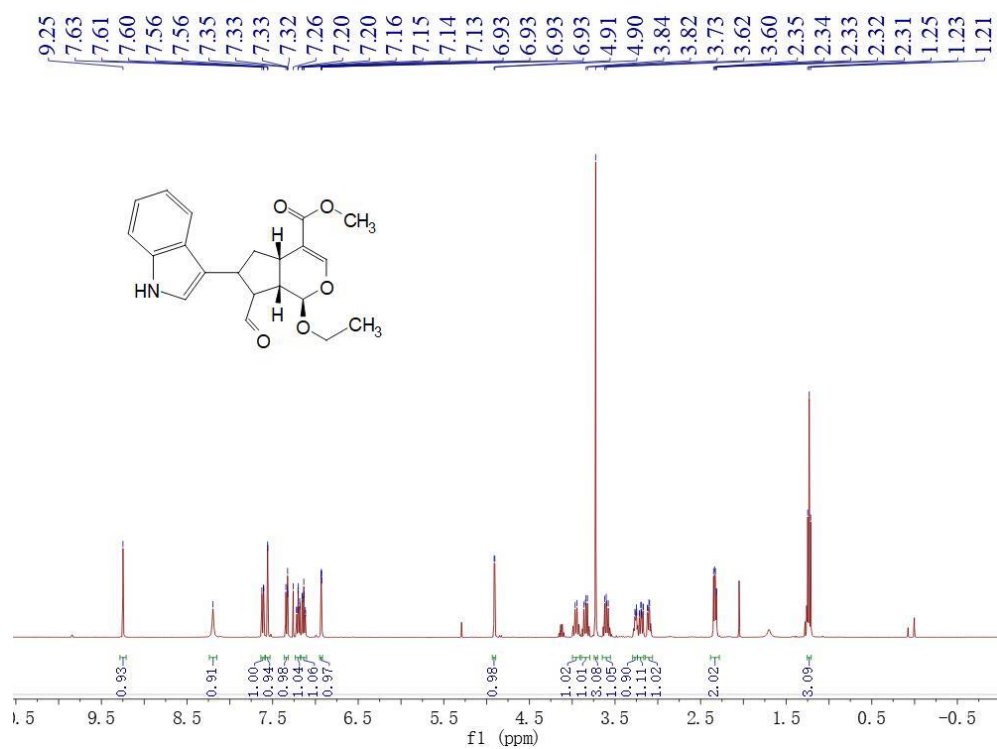

$^{13}\text{C}$ -NMR of compound **32**

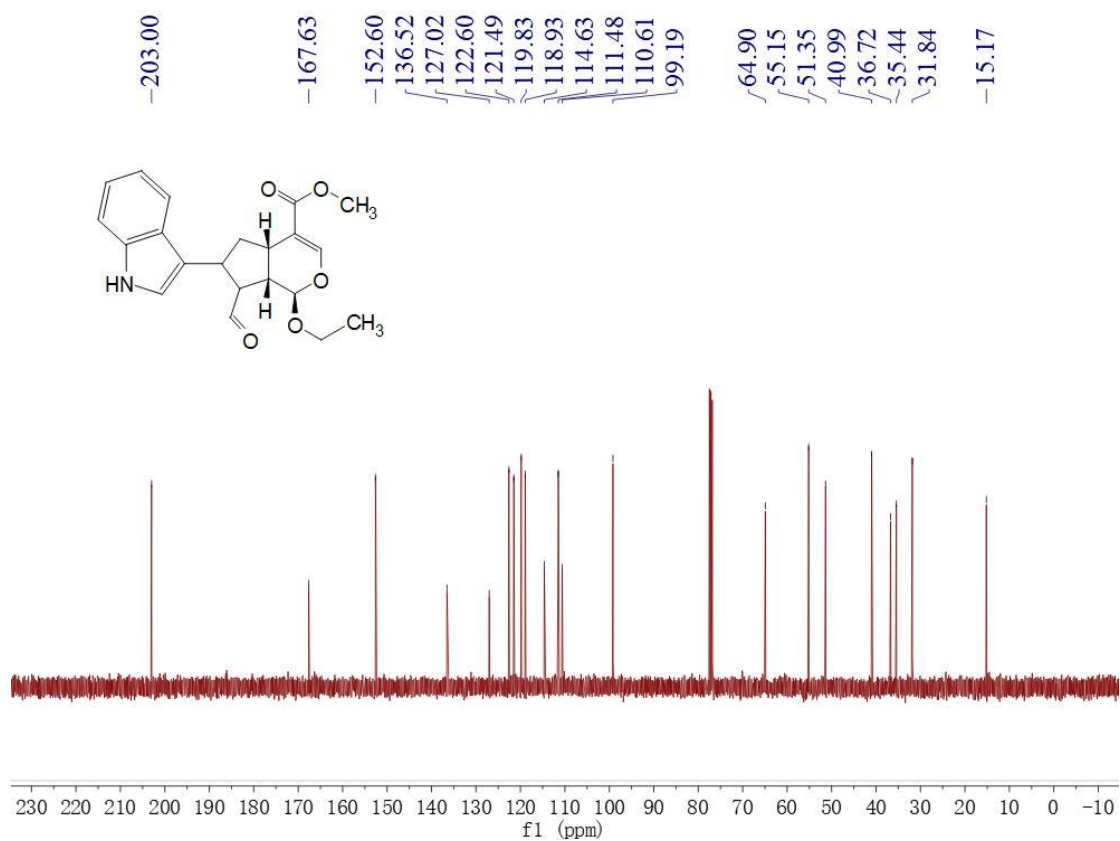

HSQC of compound **32**

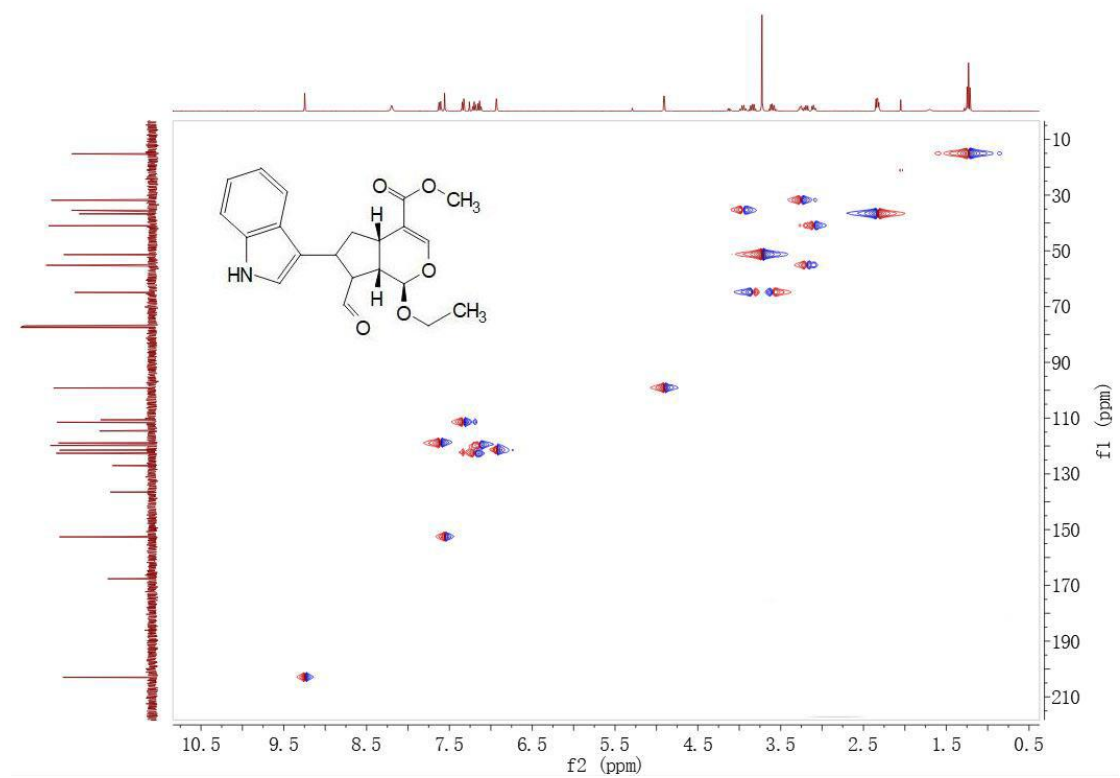



# HMBC of compound **32**

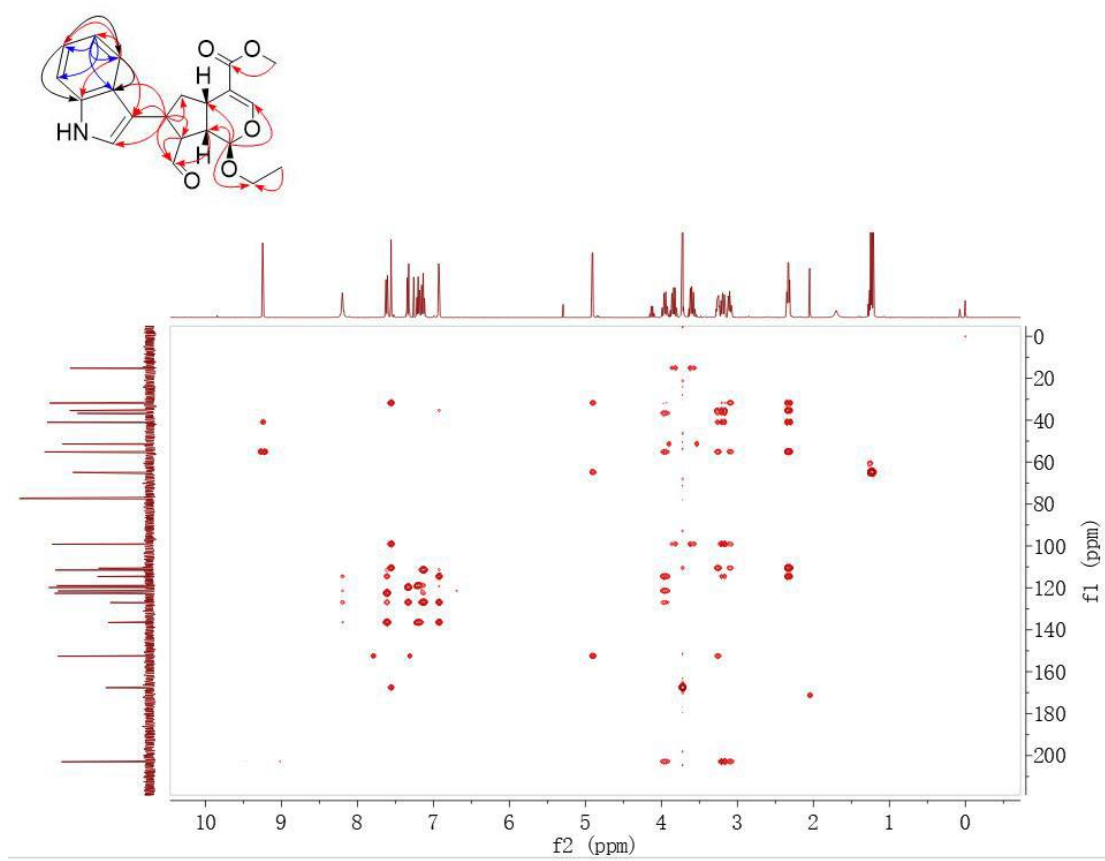

# H-H COSY of compound **32**

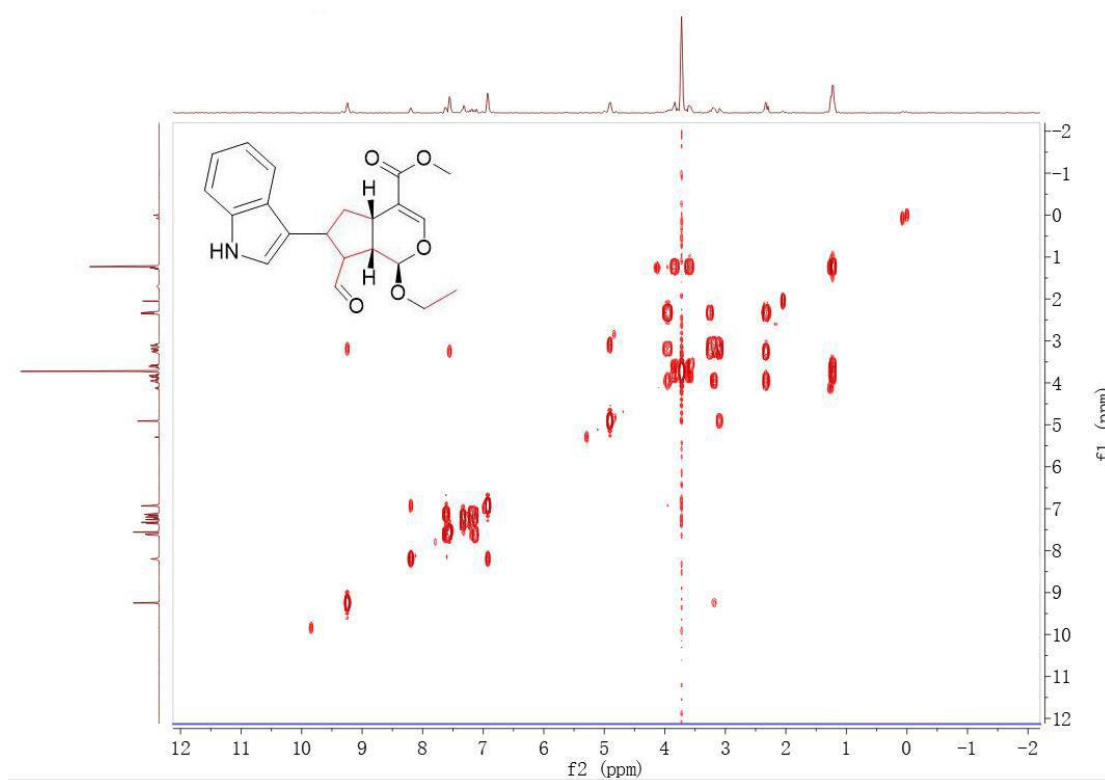

## ROESY of compound **32**

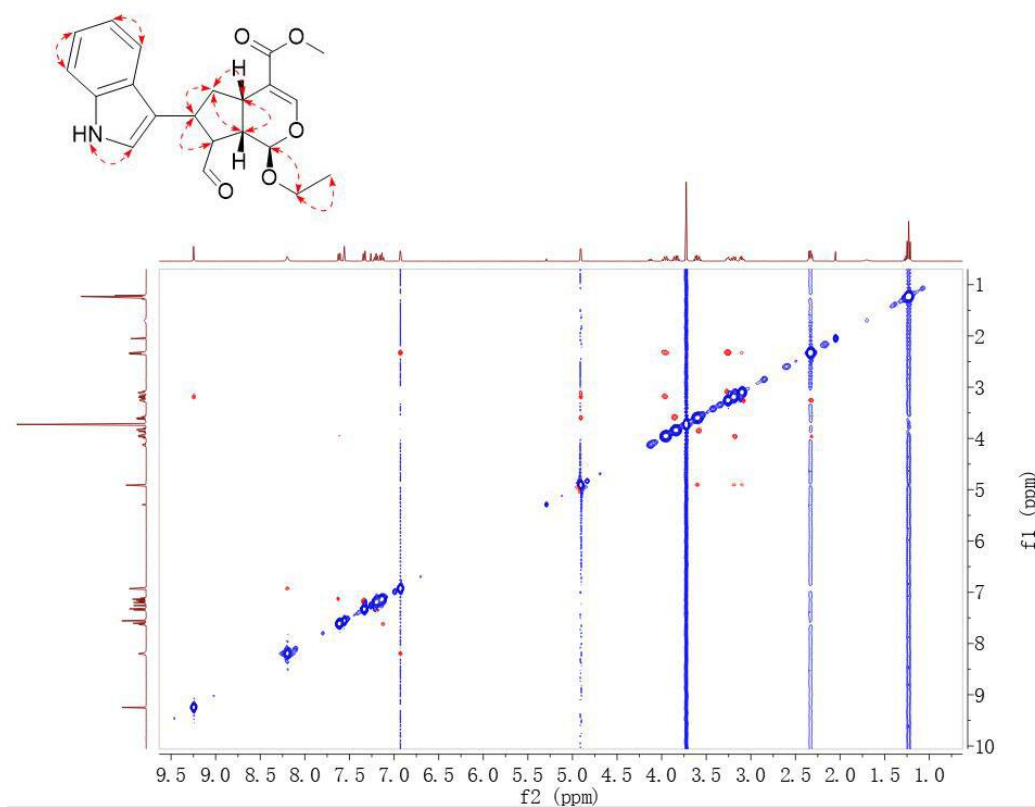

## HR-ESI-MS of compound **32**

### User Spectra

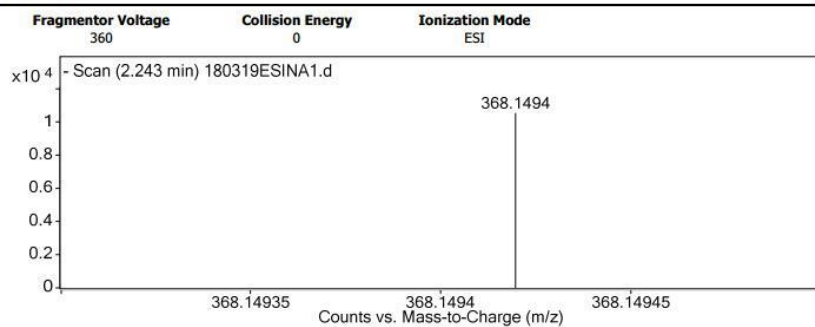

### Peak List

| <i>m/z</i> | <i>z</i> | Abund     |
|------------|----------|-----------|
| 101.0211   | 1        | 361176.84 |
| 116.9073   |          | 106036.91 |
| 118.9044   |          | 101976.38 |
| 123.1034   | 1        | 280366.63 |
| 126.9049   |          | 74298.16  |
| 127.0538   | 1        | 121464.89 |
| 127.0981   | 1        | 287931.06 |
| 152.8841   |          | 125120.5  |
| 154.8811   |          | 157801.22 |
| 186.9071   | 1        | 82006.05  |

### Formula Calculator Element Limits

| Element | Min | Max |
|---------|-----|-----|
| C       | 0   | 200 |
| H       | 0   | 400 |
| O       | 0   | 10  |
| N       | 1   | 1   |

### Formula Calculator Results

| Formula      | CalculatedMass | Mz       | Diff.(mDa) | Diff. (ppm) | DBE  |
|--------------|----------------|----------|------------|-------------|------|
| C21 H22 N O5 | 368.1498       | 368.1494 | 0.4        | 1.1         | 11.5 |

<sup>1</sup>H-NMR of compound **33**

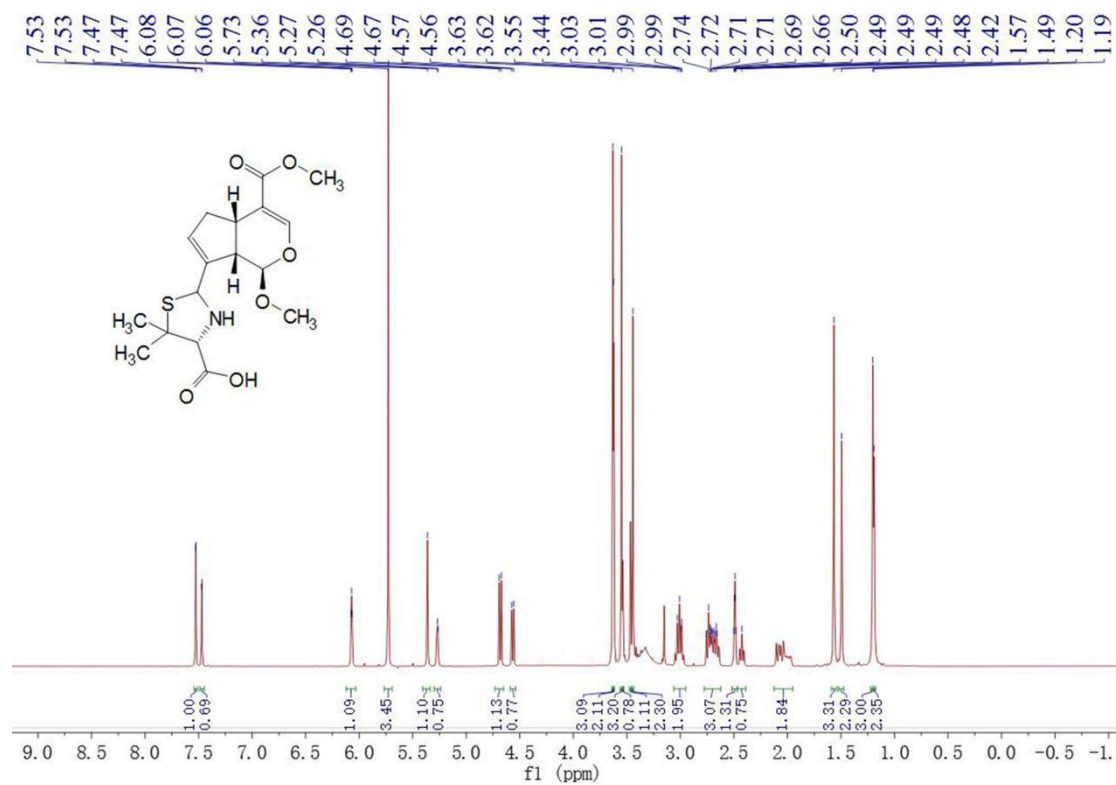

<sup>13</sup>C-NMR of compound **33**

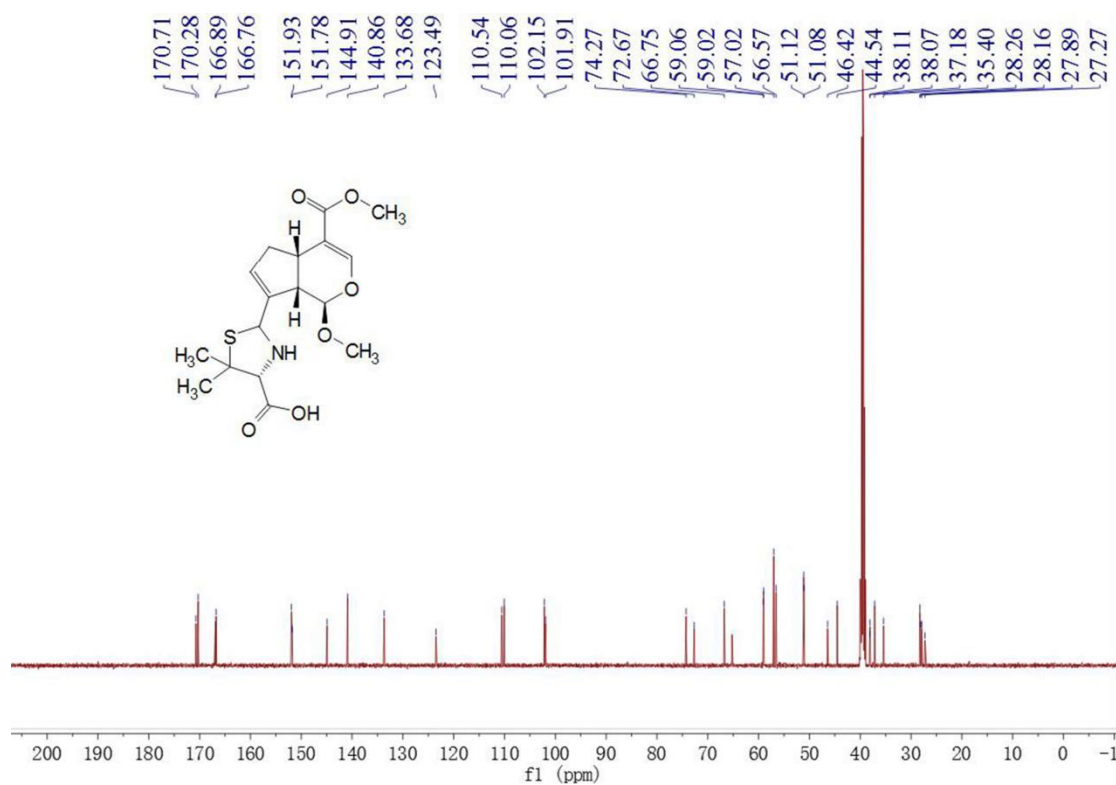



## HR-EI-MS of compound **33**

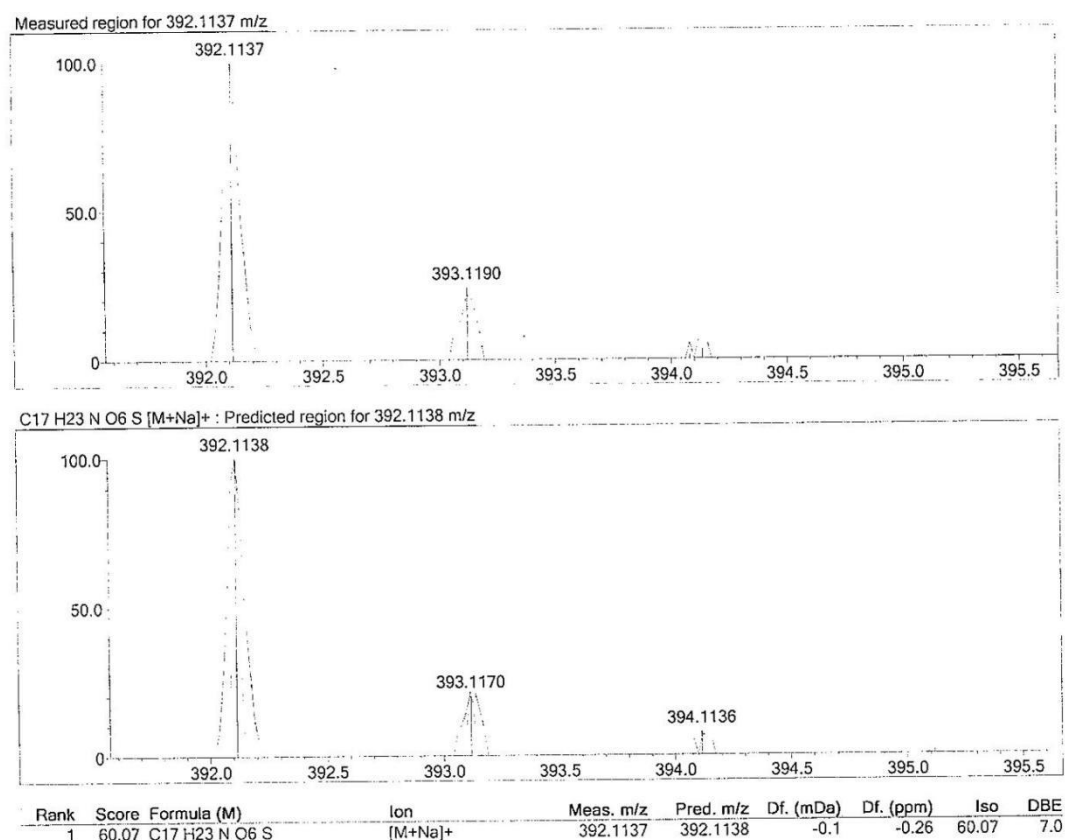

## <sup>1</sup>H-NMR of compound **34**

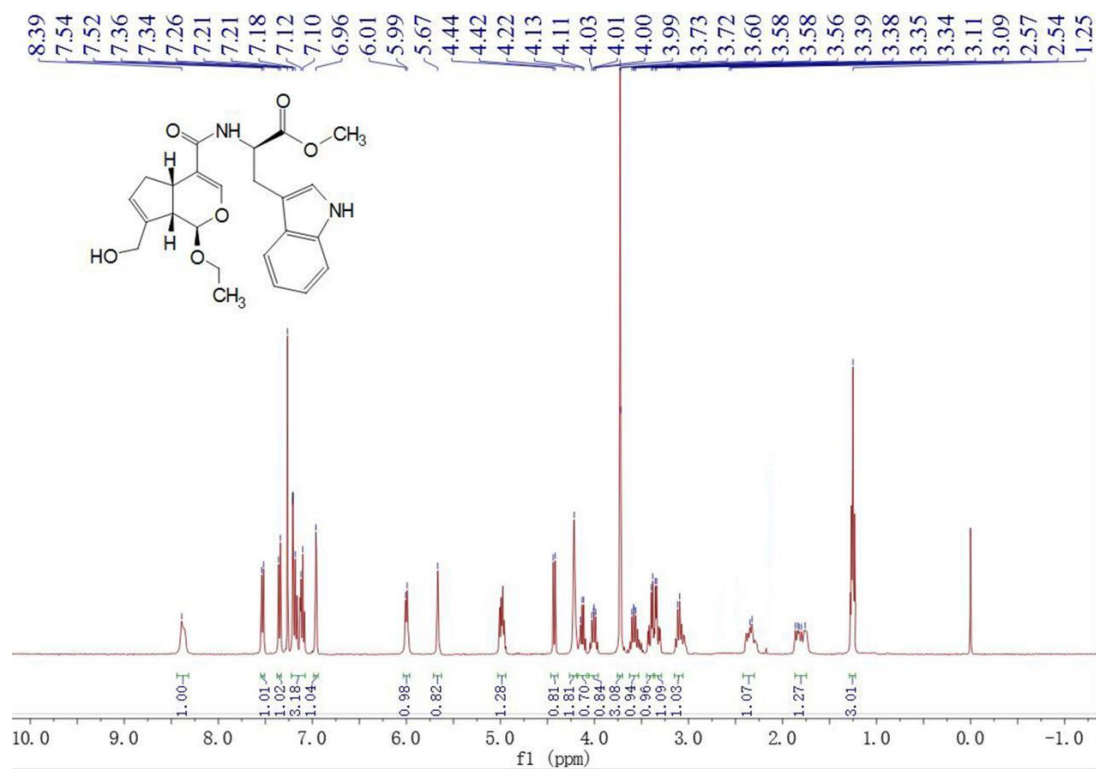

# <sup>13</sup>C-NMR of compound **34**

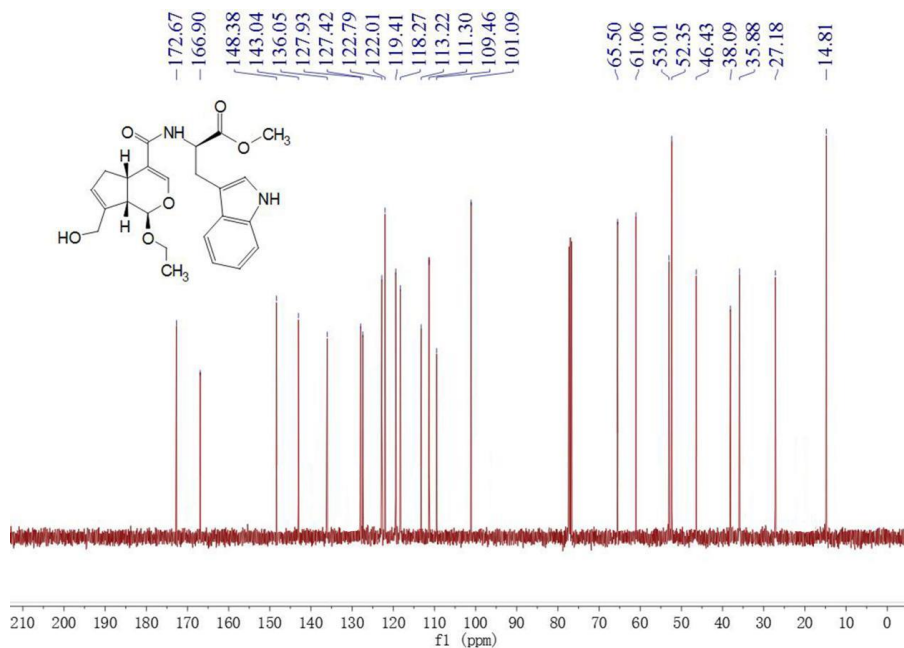

## HR-EI-MS of compound **34**

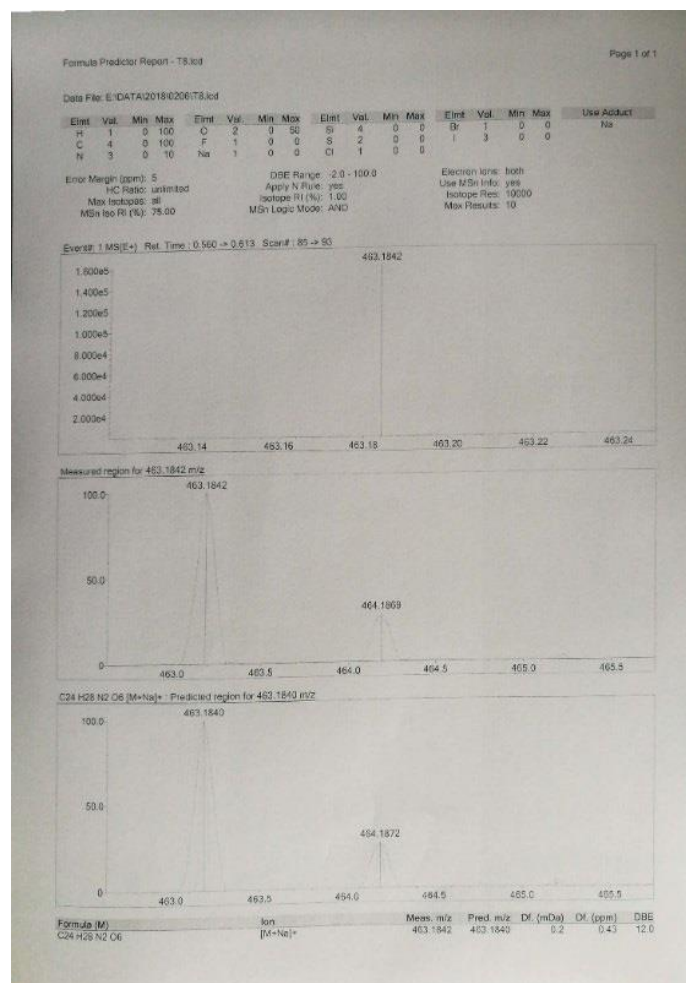

Supplement: c8ob00677f1.pdf [file c8ob00677f1.pdf]
